# Supplementary material for: Structural characterization and functional assessment of exchange–correlation functionals in van der Waals TMDs AB2 (A = Mo, W; B = S, Se, Te)
Source: Royal Society of Chemistry journal article supplement (doi:10.1039/d4nj03862b), 2024-01-01
Supplement: d4nj03862b17.pdf [file d4nj03862b17.pdf]

## Supporting Information

### Structural Characterization and Functional Assessment of Exchange-Correlation

#### Functionals in van der Waals TMDs AB<sub>2</sub> (A = Mo, W; B = S, Se, Te)

Sushant Kumar Behera, Praveen C Ramamurthy\*

*Organic Nano Electronic Group, Department of Materials Engineering, Indian Institute of Science, Bangalore -560012, India.*

\*Email: [onegroupb203@gmail.com](mailto:onegroupb203@gmail.com)

**Table S1:** This table shows the 06 TMDs materials with their structure, space group information that are considered for the simulation.

| Group | System            | Phases              |                            |                                                                                     |                             |                            |                                                                                       |
|-------|-------------------|---------------------|----------------------------|-------------------------------------------------------------------------------------|-----------------------------|----------------------------|---------------------------------------------------------------------------------------|
|       |                   | 1T                  |                            |                                                                                     | 2H                          |                            |                                                                                       |
|       |                   | Space group         | No. of atoms per unit cell | Structure                                                                           | Space group                 | No. of atoms per unit cell | Structure                                                                             |
| I     | MoS <sub>2</sub>  | P $\bar{3}m1$ (164) | 3                          | 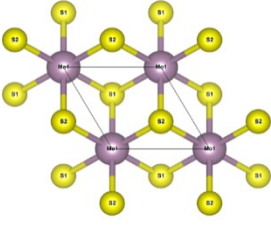 | P6 <sub>3</sub> /m mc (194) | 6                          |  |
|       | MoSe <sub>2</sub> | P $\bar{3}m1$ (164) | 6                          |  | P6 <sub>3</sub> /m mc (194) | 6                          |  |
|       | MoTe <sub>2</sub> | P $\bar{3}m1$ (164) | 6                          |  | P6 <sub>3</sub> /m mc (194) | 6                          |  |

| Functional | System            | Phase | a(Å)  |       | c(Å)   |        | A-B (Å) |       | Angle (°) |        | vdW gap (Å) |        |
|------------|-------------------|-------|-------|-------|--------|--------|---------|-------|-----------|--------|-------------|--------|
|            |                   |       | Cal.  | Expt. | Cal.   | Expt.  | Cal.    | Expt. | Cal.      | Expt.  | Cal.        | Expt.  |
| LDA        | MoS <sub>2</sub>  | 2H    | 3.124 | 3.192 | 12.058 | 13.378 | 2.383   | 2.417 | 81.622    | 80.641 | 3.437       | 4.009  |
|            |                   | 1T    | 3.132 | 3.199 | 5.829  | 6.493  | 2.400   | 2.434 | 98.530    | 97.851 | 3.228       | 3.800  |
|            | MoSe <sub>2</sub> | 2H    | 3.249 | 3.322 | 12.741 | 13.542 | 2.505   | 2.533 | 83.005    | 81.585 | 3.580       | 3.956  |
|            |                   | 1T    | 3.247 | 3.321 | 21.780 | 22.893 | 2.502   | 2.531 | 83.010    | 81.557 | 12.248      | 12.952 |
|            | MoTe <sub>2</sub> | 2H    | 3.471 | 3.565 | 13.743 | 14.647 | 2.691   | 2.727 | 83.727    | 82.002 | 3.843       | 4.273  |
|            |                   | 1T    | 3.468 | 3.560 | 23.057 | 24.811 | 2.687   | 2.724 | 83.762    | 82.090 | 12.757      | 13.866 |
|            | WS <sub>2</sub>   | 2H    | 3.125 | 3.184 | 12.159 | 12.978 | 2.387   | 2.411 | 81.786    | 80.630 | 3.463       | 3.838  |
|            |                   | 1T    | 3.124 | 3.183 | 22.442 | 23.668 | 2.387   | 2.410 | 81.776    | 80.618 | 3.455       | 3.848  |
|            | WSe <sub>2</sub>  | 2H    | 3.249 | 3.319 | 12.823 | 13.737 | 2.510   | 2.537 | 83.282    | 81.863 | 3.602       | 4.029  |
|            |                   | 1T    | 3.305 | 3.317 | 23.982 | 24.068 | 2.467   | 2.536 | 81.266    | 81.912 | 14.588      | 14.062 |
|            | WTe <sub>2</sub>  | 2H    | 3.473 | 3.561 | 13.825 | 14.847 | 2.697   | 2.728 | 83.951    | 82.199 | 3.865       | 4.352  |
|            |                   | 1T    | 3.167 | 3.560 | 24.217 | 24.728 | 2.192   | 2.729 | 81.585    | 82.177 | 12.994      | 13.858 |

|    |                  |                        |   |                                                                                     |                                   |   |                                                                                       |
|----|------------------|------------------------|---|-------------------------------------------------------------------------------------|-----------------------------------|---|---------------------------------------------------------------------------------------|
| II | WS <sub>2</sub>  | P $\bar{3}m1$<br>(164) | 6 | 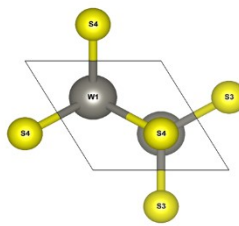   | P6 <sub>3</sub> /m<br>mc<br>(194) | 6 |    |
|    | WSe <sub>2</sub> | P $\bar{3}m1$<br>(164) | 6 |  | P6 <sub>3</sub> /m<br>mc<br>(194) | 6 |  |
|    | WTe <sub>2</sub> | P $\bar{3}m1$<br>(164) | 6 |  | P6 <sub>3</sub> /m<br>mc<br>(194) | 6 |  |

Details of the geometry optimization for all the 06 systems are tabulated below for 09 XC functional (04 functional+05 vdW-DFs).

**Table S2:** Details of the geometry optimization for all the 06 systems are tabulated below for LDA XC functional.

**Table S3:** Details of the geometry optimization for all the 06 systems are tabulated below for PBE XC functional.

| Functional | System            | Phase | a(Å)  |       | c(Å)   |        | A-B (Å) |       | Angle (°) |        | vdW gap (Å) |        |
|------------|-------------------|-------|-------|-------|--------|--------|---------|-------|-----------|--------|-------------|--------|
|            |                   |       | Cal.  | Expt. | Cal.   | Expt.  | Cal.    | Expt. | Cal.      | Expt.  | Cal.        | Expt.  |
| PBE        | MoS <sub>2</sub>  | 2H    | 3.183 | 3.192 | 14.736 | 13.378 | 2.413   | 2.417 | 80.769    | 80.641 | 4.631       | 4.009  |
|            |                   | 1T    | 3.278 | 3.199 | 6.002  | 6.493  | 2.890   | 2.434 | 98.121    | 97.851 | 3.887       | 3.800  |
|            | MoSe <sub>2</sub> | 2H    | 3.318 | 3.322 | 15.087 | 13.542 | 2.540   | 2.533 | 82.110    | 81.585 | 4.627       | 3.956  |
|            |                   | 1T    | 3.318 | 3.321 | 24.866 | 22.893 | 2.540   | 2.531 | 82.111    | 81.557 | 14.141      | 12.952 |
|            | MoTe <sub>2</sub> | 2H    | 3.731 | 3.565 | 14.886 | 14.647 | 2.810   | 2.727 | 82.510    | 82.002 | 4.030       | 4.273  |
|            |                   | 1T    | 3.550 | 3.560 | 25.160 | 24.811 | 2.731   | 2.724 | 82.756    | 82.090 | 14.043      | 13.866 |
|            | WS <sub>2</sub>   | 2H    | 3.182 | 3.184 | 14.508 | 12.978 | 2.416   | 2.411 | 81.012    | 80.630 | 4.507       | 3.838  |
|            |                   | 1T    | 3.182 | 3.183 | 26.194 | 23.668 | 2.418   | 2.410 | 81.086    | 80.618 | 4.619       | 3.848  |
|            | WSe <sub>2</sub>  | 2H    | 3.316 | 3.319 | 15.184 | 13.737 | 2.545   | 2.537 | 82.425    | 81.863 | 4.655       | 4.029  |
|            |                   | 1T    | 3.316 | 3.317 | 25.913 | 24.068 | 2.545   | 2.536 | 82.446    | 81.912 | 15.226      | 14.062 |
|            | WTe <sub>2</sub>  | 2H    | 3.553 | 3.561 | 15.382 | 14.847 | 2.736   | 2.728 | 82.894    | 82.199 | 4.552       | 4.352  |
|            |                   | 1T    | 3.554 | 3.560 | 24.906 | 24.728 | 2.737   | 2.729 | 82.853    | 82.177 | 13.944      | 13.858 |

**Table S4:** Details of the geometry optimization for all the 06 systems are tabulated below for PBESol XC functional.

| Functional | System            | Phase | a(Å)  |       | c(Å)   |        | A-B (Å) |       | Angle (°) |        | vdW gap (Å) |        |
|------------|-------------------|-------|-------|-------|--------|--------|---------|-------|-----------|--------|-------------|--------|
|            |                   |       | Cal.  | Expt. | Cal.   | Expt.  | Cal.    | Expt. | Cal.      | Expt.  | Cal.        | Expt.  |
| PBESol     | MoS <sub>2</sub>  | 2H    | 3.141 | 3.192 | 12.598 | 13.378 | 2.393   | 2.417 | 81.447    | 80.641 | 3.661       | 4.009  |
|            |                   | 1T    | 3.124 | 3.199 | 6.231  | 6.493  | 2.411   | 2.434 | 99.271    | 97.851 | 3.525       | 3.800  |
|            | MoSe <sub>2</sub> | 2H    | 3.269 | 3.322 | 13.122 | 13.542 | 2.517   | 2.533 | 82.848    | 81.585 | 3.738       | 3.956  |
|            |                   | 1T    | 3.268 | 3.321 | 22.280 | 22.893 | 2.515   | 2.531 | 82.854    | 81.557 | 12.549      | 12.952 |
|            | MoTe <sub>2</sub> | 2H    | 3.421 | 3.565 | 14.552 | 14.647 | 2.801   | 2.727 | 81.972    | 82.002 | 4.007       | 4.273  |
|            |                   | 1T    | 3.489 | 3.560 | 23.377 | 24.811 | 2.702   | 2.724 | 83.654    | 82.090 | 12.946      | 13.866 |
|            | WS <sub>2</sub>   | 2H    | 3.142 | 3.184 | 12.709 | 12.978 | 2.397   | 2.411 | 81.666    | 80.630 | 3.689       | 3.838  |
|            |                   | 1T    | 3.142 | 3.183 | 23.201 | 23.668 | 2.398   | 2.410 | 81.658    | 80.618 | 3.674       | 3.848  |
|            | WSe <sub>2</sub>  | 2H    | 3.268 | 3.319 | 13.223 | 13.737 | 2.522   | 2.537 | 83.168    | 81.863 | 3.768       | 4.029  |
|            |                   | 1T    | 3.315 | 3.317 | 24.122 | 24.068 | 2.547   | 2.536 | 81.998    | 81.912 | 14.251      | 14.062 |
|            | WTe <sub>2</sub>  | 2H    | 3.558 | 3.561 | 14.488 | 14.847 | 2.732   | 2.728 | 82.355    | 82.199 | 4.421       | 4.352  |
|            |                   | 1T    | 3.491 | 3.560 | 23.665 | 24.728 | 2.711   | 2.729 | 83.880    | 82.177 | 13.164      | 13.858 |

**Table S5:** Details of the geometry optimization for all the 06 systems are tabulated below for SCAN XC functional.

| Functional | System            | Phase | a(Å)  |       | c(Å)   |        | A-B (Å) |       | Angle (°) |        | vdW gap (Å) |        |
|------------|-------------------|-------|-------|-------|--------|--------|---------|-------|-----------|--------|-------------|--------|
|            |                   |       | Cal.  | Expt. | Cal.   | Expt.  | Cal.    | Expt. | Cal.      | Expt.  | Cal.        | Expt.  |
| SCAN       | MoS <sub>2</sub>  | 2H    | 3.168 | 3.192 | 13.154 | 13.378 | 2.404   | 2.417 | 80.916    | 80.641 | 3.911       | 4.009  |
|            |                   | 1T    | 3.203 | 3.199 | 6.370  | 6.493  | 2.420   | 2.434 | 97.122    | 97.851 | 3.737       | 3.800  |
|            | MoSe <sub>2</sub> | 2H    | 3.301 | 3.322 | 13.328 | 13.542 | 2.525   | 2.533 | 81.995    | 81.585 | 3.854       | 3.956  |
|            |                   | 1T    | 3.300 | 3.321 | 22.642 | 22.893 | 2.523   | 2.531 | 82.020    | 81.557 | 12.782      | 12.952 |
|            | MoTe <sub>2</sub> | 2H    | 3.514 | 3.565 | 14.593 | 14.647 | 2.708   | 2.727 | 82.956    | 82.002 | 4.228       | 4.273  |
|            |                   | 1T    | 3.513 | 3.560 | 24.296 | 24.811 | 2.706   | 2.724 | 82.958    | 82.090 | 13.568      | 13.866 |
|            | WS <sub>2</sub>   | 2H    | 3.157 | 3.184 | 12.760 | 12.978 | 2.398   | 2.411 | 81.085    | 80.630 | 3.736       | 3.838  |
|            |                   | 1T    | 3.157 | 3.183 | 24.210 | 23.668 | 2.397   | 2.410 | 81.008    | 80.618 | 3.982       | 3.848  |
|            | WSe <sub>2</sub>  | 2H    | 3.290 | 3.319 | 13.828 | 13.737 | 2.519   | 2.537 | 82.145    | 81.863 | 4.072       | 4.029  |
|            |                   | 1T    | 3.455 | 3.317 | 24.420 | 24.068 | 2.664   | 2.536 | 82.078    | 81.912 | 14.428      | 14.062 |
|            | WTe <sub>2</sub>  | 2H    | 3.510 | 3.561 | 14.606 | 14.847 | 2.704   | 2.728 | 82.959    | 82.199 | 4.236       | 4.352  |
|            |                   | 1T    | 3.398 | 3.560 | 25.021 | 24.728 | 2.748   | 2.729 | 83.649    | 82.177 | 13.962      | 13.858 |

**Table S6:** Details of the geometry optimization for all the 06 systems are tabulated below for optB88-vdW vdW-DF functional.

| Functional | System            | Phase | a(Å)  |       | c(Å)   |        | A-B (Å) |       | Angle (°) |        | vdW gap (Å) |        |
|------------|-------------------|-------|-------|-------|--------|--------|---------|-------|-----------|--------|-------------|--------|
|            |                   |       | Cal.  | Expt. | Cal.   | Expt.  | Cal.    | Expt. | Cal.      | Expt.  | Cal.        | Expt.  |
| optB88-vdW | MoS <sub>2</sub>  | 2H    | 3.219 | 3.192 | 12.877 | 13.378 | 2.554   | 2.417 | 80.021    | 80.641 | 3.998       | 4.009  |
|            |                   | 1T    | 3.221 | 3.199 | 6.057  | 6.493  | 2.438   | 2.434 | 97.329    | 97.851 | 3.447       | 3.800  |
|            | MoSe <sub>2</sub> | 2H    | 3.330 | 3.322 | 13.166 | 13.542 | 2.551   | 2.533 | 82.194    | 81.585 | 3.756       | 3.956  |
|            |                   | 1T    | 3.327 | 3.321 | 22.436 | 22.893 | 2.549   | 2.531 | 82.242    | 81.557 | 12.649      | 12.952 |
|            | MoTe <sub>2</sub> | 2H    | 3.568 | 3.565 | 14.233 | 14.647 | 2.742   | 2.727 | 82.618    | 82.002 | 4.057       | 4.273  |
|            |                   | 1T    | 3.564 | 3.560 | 23.751 | 24.811 | 2.740   | 2.724 | 82.701    | 82.090 | 13.175      | 13.866 |
|            | WS <sub>2</sub>   | 2H    | 3.191 | 3.184 | 12.528 | 12.978 | 2.425   | 2.411 | 81.131    | 80.630 | 3.613       | 3.838  |
|            |                   | 1T    | 3.190 | 3.183 | 22.883 | 23.668 | 2.424   | 2.410 | 81.154    | 80.618 | 3.618       | 3.848  |
|            | WSe <sub>2</sub>  | 2H    | 3.328 | 3.319 | 13.227 | 13.737 | 2.555   | 2.537 | 82.502    | 81.863 | 3.770       | 4.029  |
|            |                   | 1T    | 3.325 | 3.317 | 23.495 | 24.068 | 2.553   | 2.536 | 82.551    | 81.912 | 13.650      | 14.062 |
|            | WTe <sub>2</sub>  | 2H    | 3.512 | 3.561 | 14.224 | 14.847 | 2.790   | 2.728 | 82.466    | 82.199 | 4.044       | 4.352  |
|            |                   | 1T    | 3.567 | 3.560 | 23.921 | 24.728 | 2.747   | 2.729 | 82.834    | 82.177 | 13.311      | 13.858 |

**Table S7:** Details of the geometry optimization for all the 06 systems are tabulated below for optPBE-vdW vdW-DF functional.

| Functional | System            | Phase | a(Å)  |       | c(Å)   |        | A-B (Å) |       | Angle (°) |        | vdW gap (Å) |        |
|------------|-------------------|-------|-------|-------|--------|--------|---------|-------|-----------|--------|-------------|--------|
|            |                   |       | Cal.  | Expt. | Cal.   | Expt.  | Cal.    | Expt. | Cal.      | Expt.  | Cal.        | Expt.  |
| optPBE-vdW | MoS <sub>2</sub>  | 2H    | 3.202 | 3.192 | 12.744 | 13.378 | 2.427   | 2.417 | 80.787    | 80.641 | 3.717       | 4.009  |
|            |                   | 1T    | 3.226 | 3.199 | 6.235  | 6.493  | 2.443   | 2.434 | 97.380    | 97.851 | 3.592       | 3.800  |
|            | MoSe <sub>2</sub> | 2H    | 3.341 | 3.322 | 13.442 | 13.542 | 2.557   | 2.533 | 82.044    | 81.585 | 3.878       | 3.956  |
|            |                   | 1T    | 3.339 | 3.321 | 23.099 | 22.893 | 2.555   | 2.531 | 82.055    | 81.557 | 13.050      | 12.952 |
|            | MoTe <sub>2</sub> | 2H    | 3.502 | 3.565 | 14.332 | 14.647 | 2.769   | 2.727 | 82.003    | 82.002 | 4.054       | 4.273  |
|            |                   | 1T    | 3.577 | 3.560 | 24.096 | 24.811 | 2.749   | 2.724 | 82.555    | 82.090 | 13.383      | 13.866 |
|            | WS <sub>2</sub>   | 2H    | 3.200 | 3.184 | 12.791 | 12.978 | 2.430   | 2.411 | 81.012    | 80.630 | 3.728       | 3.838  |
|            |                   | 1T    | 3.198 | 3.183 | 23.407 | 23.668 | 2.429   | 2.410 | 81.058    | 80.618 | 3.728       | 3.848  |
|            | WSe <sub>2</sub>  | 2H    | 3.338 | 3.319 | 13.505 | 13.737 | 2.561   | 2.537 | 82.383    | 81.863 | 3.889       | 4.029  |
|            |                   | 1T    | 3.317 | 3.317 | 24.068 | 24.068 | 2.534   | 2.536 | 81.932    | 81.912 | 14.061      | 14.062 |
|            | WTe <sub>2</sub>  | 2H    | 3.558 | 3.561 | 14.690 | 14.847 | 2.774   | 2.728 | 81.803    | 82.199 | 4.554       | 4.352  |
|            |                   | 1T    | 3.579 | 3.560 | 24.282 | 24.728 | 2.752   | 2.729 | 82.696    | 82.177 | 13.541      | 13.858 |

**Table S8:** Details of the geometry optimization for all the 06 systems are tabulated below for vdW-DF2 vdW-DF functional.

| Functional | System            | Phase | a(Å)  |       | c(Å)   |        | A-B (Å) |       | Angle (°) |        | vdW gap (Å) |        |
|------------|-------------------|-------|-------|-------|--------|--------|---------|-------|-----------|--------|-------------|--------|
|            |                   |       | Cal.  | Expt. | Cal.   | Expt.  | Cal.    | Expt. | Cal.      | Expt.  | Cal.        | Expt.  |
| vdW-DF2    | MoS <sub>2</sub>  | 2H    | 3.218 | 3.192 | 13.012 | 13.378 | 2.505   | 2.417 | 80.811    | 80.641 | 4.078       | 4.009  |
|            |                   | 1T    | 3.353 | 3.199 | 6.192  | 6.493  | 2.486   | 2.434 | 95.192    | 97.851 | 3.631       | 3.800  |
|            | MoSe <sub>2</sub> | 2H    | 3.443 | 3.322 | 13.726 | 13.542 | 2.611   | 2.533 | 80.847    | 81.585 | 4.004       | 3.956  |
|            |                   | 1T    | 3.440 | 3.321 | 23.219 | 22.893 | 2.609   | 2.531 | 80.914    | 81.557 | 13.109      | 12.952 |
|            | MoTe <sub>2</sub> | 2H    | 3.452 | 3.565 | 14.076 | 14.647 | 2.665   | 2.727 | 82.303    | 82.002 | 3.997       | 4.273  |
|            |                   | 1T    | 3.708 | 3.560 | 24.627 | 24.811 | 2.813   | 2.724 | 80.943    | 82.090 | 13.708      | 13.866 |
|            | WS <sub>2</sub>   | 2H    | 3.278 | 3.184 | 12.916 | 12.978 | 2.470   | 2.411 | 79.980    | 80.630 | 3.785       | 3.838  |
|            |                   | 1T    | 3.276 | 3.183 | 23.588 | 23.668 | 2.469   | 2.410 | 80.001    | 80.618 | 3.788       | 3.848  |
|            | WSe <sub>2</sub>  | 2H    | 3.436 | 3.319 | 13.725 | 13.737 | 2.613   | 2.537 | 81.177    | 81.863 | 3.991       | 4.029  |
|            |                   | 1T    | 3.434 | 3.317 | 24.307 | 24.068 | 2.612   | 2.536 | 81.219    | 81.912 | 14.175      | 14.062 |
|            | WTe <sub>2</sub>  | 2H    | 3.711 | 3.561 | 15.002 | 14.847 | 2.816   | 2.728 | 81.909    | 82.199 | 4.403       | 4.352  |
|            |                   | 1T    | 3.709 | 3.560 | 24.779 | 24.728 | 2.815   | 2.729 | 81.971    | 82.177 | 13.844      | 13.858 |

**Table S9:** Details of the geometry optimization for all the 06 systems are tabulated below for rev-vdW-DF2 vdW-DF functional.

| Functional  | System            | Phase | a(Å)  |       | c(Å)   |        | A-B (Å) |       | Angle (°) |        | vdW gap (Å) |        |
|-------------|-------------------|-------|-------|-------|--------|--------|---------|-------|-----------|--------|-------------|--------|
|             |                   |       | Cal.  | Expt. | Cal.   | Expt.  | Cal.    | Expt. | Cal.      | Expt.  | Cal.        | Expt.  |
| rev-vdW-DF2 | MoS <sub>2</sub>  | 2H    | 3.210 | 3.192 | 12.775 | 13.378 | 2.610   | 2.417 | 81.809    | 80.641 | 3.765       | 4.009  |
|             |                   | 1T    | 3.177 | 3.199 | 6.037  | 6.493  | 2.428   | 2.434 | 98.269    | 97.851 | 3.394       | 3.800  |
|             | MoSe <sub>2</sub> | 2H    | 3.300 | 3.322 | 13.021 | 13.542 | 2.538   | 2.533 | 82.695    | 81.585 | 3.688       | 3.956  |
|             |                   | 1T    | 3.298 | 3.321 | 22.201 | 22.893 | 2.536   | 2.531 | 82.706    | 81.557 | 12.488      | 12.952 |
|             | MoTe <sub>2</sub> | 2H    | 3.531 | 3.565 | 14.005 | 14.647 | 2.728   | 2.727 | 83.299    | 82.002 | 3.964       | 4.273  |
|             |                   | 1T    | 3.527 | 3.560 | 23.507 | 24.811 | 2.724   | 2.724 | 83.329    | 82.090 | 13.019      | 13.866 |
|             | WS <sub>2</sub>   | 2H    | 3.167 | 3.184 | 12.414 | 12.978 | 2.415   | 2.411 | 81.578    | 80.630 | 3.556       | 3.838  |
|             |                   | 1T    | 3.166 | 3.183 | 22.834 | 23.668 | 2.415   | 2.410 | 81.577    | 80.618 | 3.560       | 3.848  |
|             | WSe <sub>2</sub>  | 2H    | 3.298 | 3.319 | 13.087 | 13.737 | 2.543   | 2.537 | 83.032    | 81.863 | 3.701       | 4.029  |
|             |                   | 1T    | 3.297 | 3.317 | 23.324 | 24.068 | 2.541   | 2.536 | 83.025    | 81.912 | 13.552      | 14.062 |
|             | WTe <sub>2</sub>  | 2H    | 3.531 | 3.561 | 14.104 | 14.847 | 2.733   | 2.728 | 83.525    | 82.199 | 3.974       | 4.352  |
|             |                   | 1T    | 3.323 | 3.560 | 24.199 | 24.728 | 2.443   | 2.729 | 82.458    | 82.177 | 13.221      | 13.858 |

**Table S10:** Details of the geometry optimization for all the 06 systems are tabulated below for SCAN+rVV10 vdW-DF functional.

| Functional | System            | Phase | a(Å)  |       | c(Å)   |        | A-B (Å) |       | Angle (°) |        | vdW gap (Å) |        |
|------------|-------------------|-------|-------|-------|--------|--------|---------|-------|-----------|--------|-------------|--------|
|            |                   |       | Cal.  | Expt. | Cal.   | Expt.  | Cal.    | Expt. | Cal.      | Expt.  | Cal.        | Expt.  |
| SCAN+rVV10 | MoS <sub>2</sub>  | 2H    | 3.506 | 3.192 | 12.998 | 13.378 | 2.554   | 2.417 | 80.987    | 80.641 | 3.779       | 4.009  |
|            |                   | 1T    | 3.204 | 3.199 | 5.958  | 6.493  | 2.417   | 2.434 | 96.950    | 97.851 | 3.395       | 3.800  |
|            | MoSe <sub>2</sub> | 2H    | 3.292 | 3.322 | 13.118 | 13.542 | 2.522   | 2.533 | 82.213    | 81.585 | 3.758       | 3.956  |
|            |                   | 1T    | 3.291 | 3.321 | 20.722 | 22.893 | 2.522   | 2.531 | 82.23     | 81.557 | 11.056      | 12.952 |
|            | MoTe <sub>2</sub> | 2H    | 3.500 | 3.565 | 14.030 | 14.647 | 2.705   | 2.727 | 83.324    | 82.002 | 3.972       | 4.273  |
|            |                   | 1T    | 3.498 | 3.560 | 23.124 | 24.811 | 2.703   | 2.724 | 83.334    | 82.090 | 12.699      | 13.866 |
|            | WS <sub>2</sub>   | 2H    | 3.148 | 3.184 | 12.646 | 12.978 | 2.394   | 2.411 | 81.245    | 80.630 | 3.684       | 3.838  |
|            |                   | 1T    | 3.149 | 3.183 | 24.039 | 23.668 | 2.394   | 2.410 | 81.172    | 80.618 | 3.933       | 3.848  |
|            | WSe <sub>2</sub>  | 2H    | 3.278 | 3.319 | 13.144 | 13.737 | 2.517   | 2.537 | 82.512    | 81.863 | 3.761       | 4.029  |
|            |                   | 1T    | 3.278 | 3.317 | 22.594 | 24.068 | 2.517   | 2.536 | 82.505    | 81.912 | 12.881      | 14.062 |
|            | WTe <sub>2</sub>  | 2H    | 3.494 | 3.561 | 14.043 | 14.847 | 2.702   | 2.728 | 83.423    | 82.199 | 3.973       | 4.352  |
|            |                   | 1T    | 3.226 | 3.560 | 24.641 | 24.728 | 2.965   | 2.729 | 82.571    | 82.177 | 13.993      | 13.858 |

**Table S11:** Details of the energy values and the 1T-2H difference for all the 06 systems for 09 XC functional (04 functional+05 vdW-DFs).

| Functional | Serial | System            | 1T (eV/atom) | 2H (eV/atom) | 1T-2H (eV/atom) |
|------------|--------|-------------------|--------------|--------------|-----------------|
| LDA        | I      | MoS <sub>2</sub>  | -7.8897      | -8.1642      | 0.2745          |
|            |        | MoSe <sub>2</sub> | -7.5424      | -7.5632      | 0.0208          |
|            |        | MoTe <sub>2</sub> | -6.8752      | -6.9017      | 0.0265          |
|            | II     | WS <sub>2</sub>   | -8.7639      | -8.7819      | 0.0180          |
|            |        | WSe <sub>2</sub>  | -8.0907      | -8.1106      | 0.0199          |
|            |        | WTe <sub>2</sub>  | -7.3419      | -7.3680      | 0.0261          |
| PBE        | I      | MoS <sub>2</sub>  | -6.9893      | -7.2679      | 0.2786          |
|            |        | MoSe <sub>2</sub> | -6.6583      | -6.6590      | 0.0007          |
|            |        | MoTe <sub>2</sub> | -6.0125      | -6.0148      | 0.0023          |
|            | II     | WS <sub>2</sub>   | -7.9072      | -7.9082      | 0.0010          |

|                  |    |                   |          |          |        |
|------------------|----|-------------------|----------|----------|--------|
| PBESol           |    | WSe <sub>2</sub>  | -7.2247  | -7.2252  | 0.0005 |
|                  |    | WTe <sub>2</sub>  | -6.4949  | -6.4974  | 0.0025 |
|                  | I  | MoS <sub>2</sub>  | -18.6625 | -18.9551 | 0.2926 |
|                  |    | MoSe <sub>2</sub> | -25.6873 | -25.6962 | 0.0089 |
|                  |    | MoTe <sub>2</sub> | -36.7242 | -36.7364 | 0.0122 |
|                  | II | WS <sub>2</sub>   | -30.5459 | -30.5540 | 0.0081 |
| WSe <sub>2</sub> |    | -37.2012          | -37.2099 | 0.0087   |        |
| WTe <sub>2</sub> |    | -48.1406          | -48.1528 | 0.0122   |        |
| SCAN             | I  | MoS <sub>2</sub>  | -18.6625 | -18.9551 | 0.2926 |
|                  |    | MoSe <sub>2</sub> | -25.6873 | -25.6962 | 0.0089 |
|                  |    | MoTe <sub>2</sub> | -36.7242 | -36.7364 | 0.0122 |
|                  | II | WS <sub>2</sub>   | -30.5459 | -30.5540 | 0.0081 |
|                  |    | WSe <sub>2</sub>  | -37.2010 | -37.2099 | 0.0089 |
|                  |    | WTe <sub>2</sub>  | -48.1406 | -48.1528 | 0.0122 |
| optB88-vdW       | I  | MoS <sub>2</sub>  | -5.1351  | -5.3994  | 0.2643 |
|                  |    | MoSe <sub>2</sub> | -4.6545  | -4.6946  | 0.0401 |
|                  |    | MoTe <sub>2</sub> | -3.7995  | -3.8447  | 0.0452 |
|                  | II | WS <sub>2</sub>   | -6.0246  | -6.0627  | 0.0381 |
|                  |    | WSe <sub>2</sub>  | -5.2459  | -5.2861  | 0.0402 |
|                  |    | WTe <sub>2</sub>  | -4.3123  | -4.3576  | 0.0453 |
| optPBE-vdW       | I  | MoS <sub>2</sub>  | -4.9774  | -5.2435  | 0.2661 |
|                  |    | MoSe <sub>2</sub> | -4.4947  | -4.5303  | 0.0356 |
|                  |    | MoTe <sub>2</sub> | -3.6417  | -3.6812  | 0.0395 |
|                  | II | WS <sub>2</sub>   | -5.8835  | -5.9182  | 0.0347 |
|                  |    | WSe <sub>2</sub>  | -5.0966  | -5.1322  | 0.0356 |
|                  |    | WTe <sub>2</sub>  | -4.1637  | -4.2034  | 0.0397 |
| vdW-DF2          | I  | MoS <sub>2</sub>  | -4.5613  | -4.8015  | 0.2402 |
|                  |    | MoSe <sub>2</sub> | -4.0355  | -4.0671  | 0.0316 |
|                  |    | MoTe <sub>2</sub> | -3.1872  | -3.2213  | 0.0341 |
|                  | II | WS <sub>2</sub>   | -5.3948  | -5.4257  | 0.0309 |
|                  |    | WSe <sub>2</sub>  | -4.5826  | -4.6143  | 0.0317 |
|                  |    | WTe <sub>2</sub>  | -3.6589  | -3.6871  | 0.0282 |
| rev-vdW-DF2      | I  | MoS <sub>2</sub>  | -5.4962  | -5.7657  | 0.2695 |
|                  |    | MoSe <sub>2</sub> | -5.0331  | -5.0702  | 0.0371 |
|                  |    | MoTe <sub>2</sub> | -4.1986  | -4.2422  | 0.0436 |
|                  | II | WS <sub>2</sub>   | -6.4082  | -6.4431  | 0.0349 |
|                  |    | WSe <sub>2</sub>  | -5.6389  | -5.6761  | 0.0372 |
|                  |    | WTe <sub>2</sub>  | -4.7241  | -4.7678  | 0.0437 |
| SCAN+rVV10       | I  | MoS <sub>2</sub>  | -18.5763 | -18.8713 | 0.2950 |
|                  |    | MoSe <sub>2</sub> | -25.5722 | -25.6034 | 0.0312 |
|                  |    | MoTe <sub>2</sub> | -36.5923 | -36.6297 | 0.0374 |
|                  | II | WS <sub>2</sub>   | -30.4357 | -30.4687 | 0.0330 |
|                  |    | WSe <sub>2</sub>  | -37.0886 | -37.1197 | 0.0311 |
|                  |    | WTe <sub>2</sub>  | -48.0154 | -48.0155 | 0.0001 |



## Electronic Band structures:

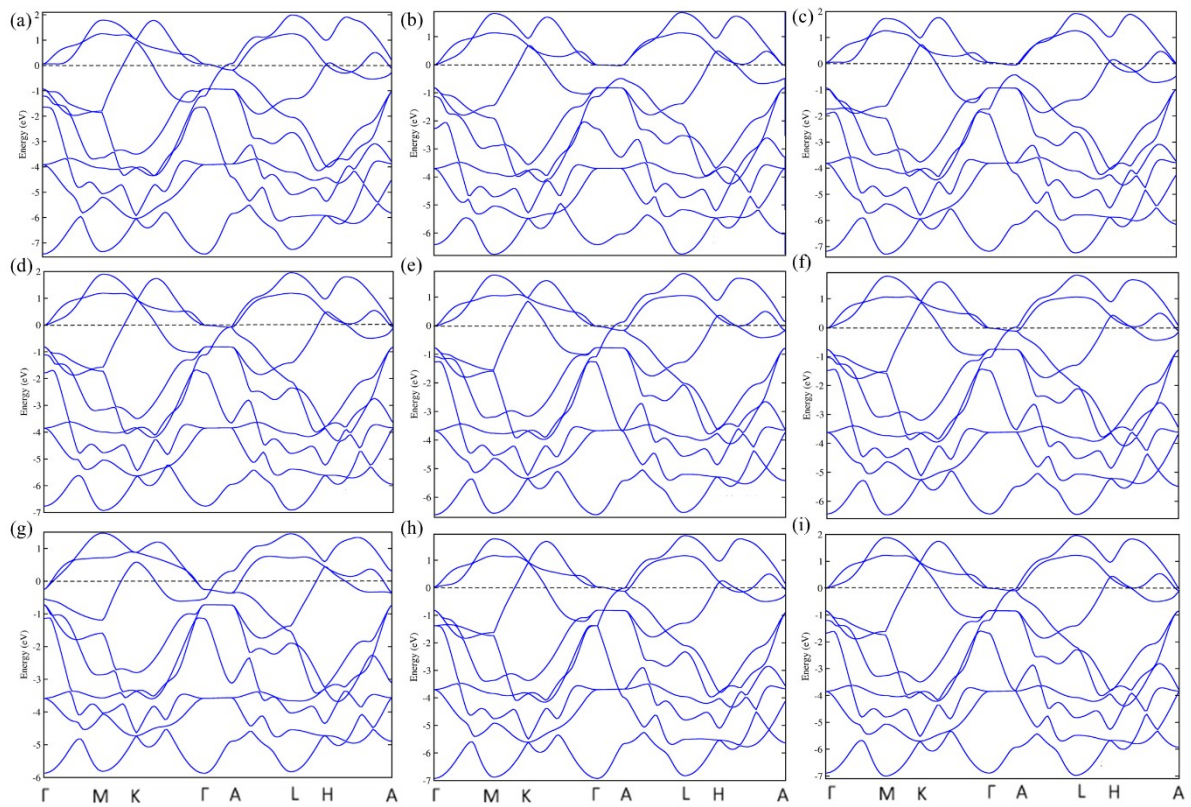

**Figure S1:** Band structures of 1T phase of MoS<sub>2</sub> for all 09 XC functional (a) LDA, (b) PBE, (c) PBESol, (d) SCAN, (e) optB88-vdW, (f) optPBE-vdW, (g) vdW-DF2, (h) rev-vdW-DF2 and (i) SCAN+rVV10.



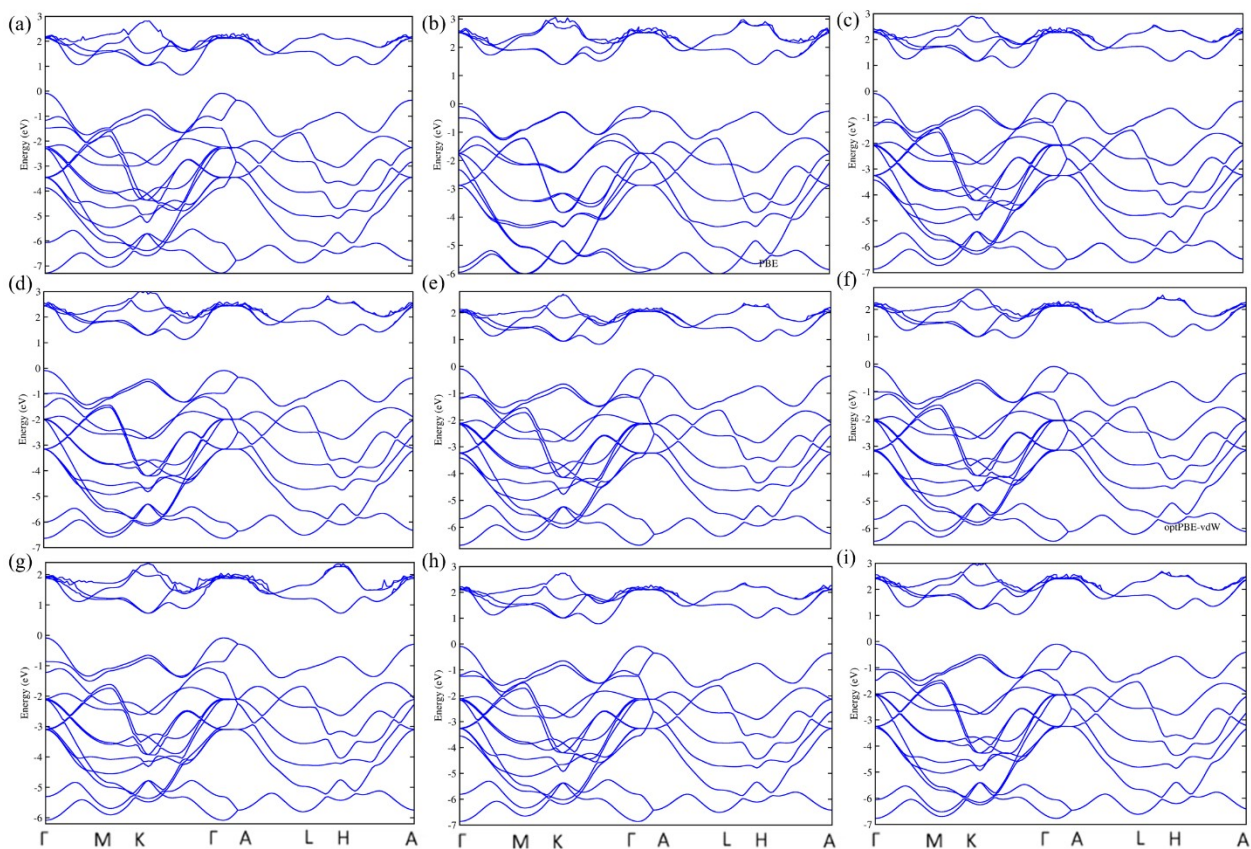

**Figure S2:** Band structures of 2H phase of MoS<sub>2</sub> for all 09 XC functional (a) LDA, (b) PBE, (c) PBEsol, (d) SCAN, (e) optB88-vdW, (f) optPBE-vdW, (g) vdW-DF2, (h) rev-vdW-DF2 and (i) SCAN+rVV10.

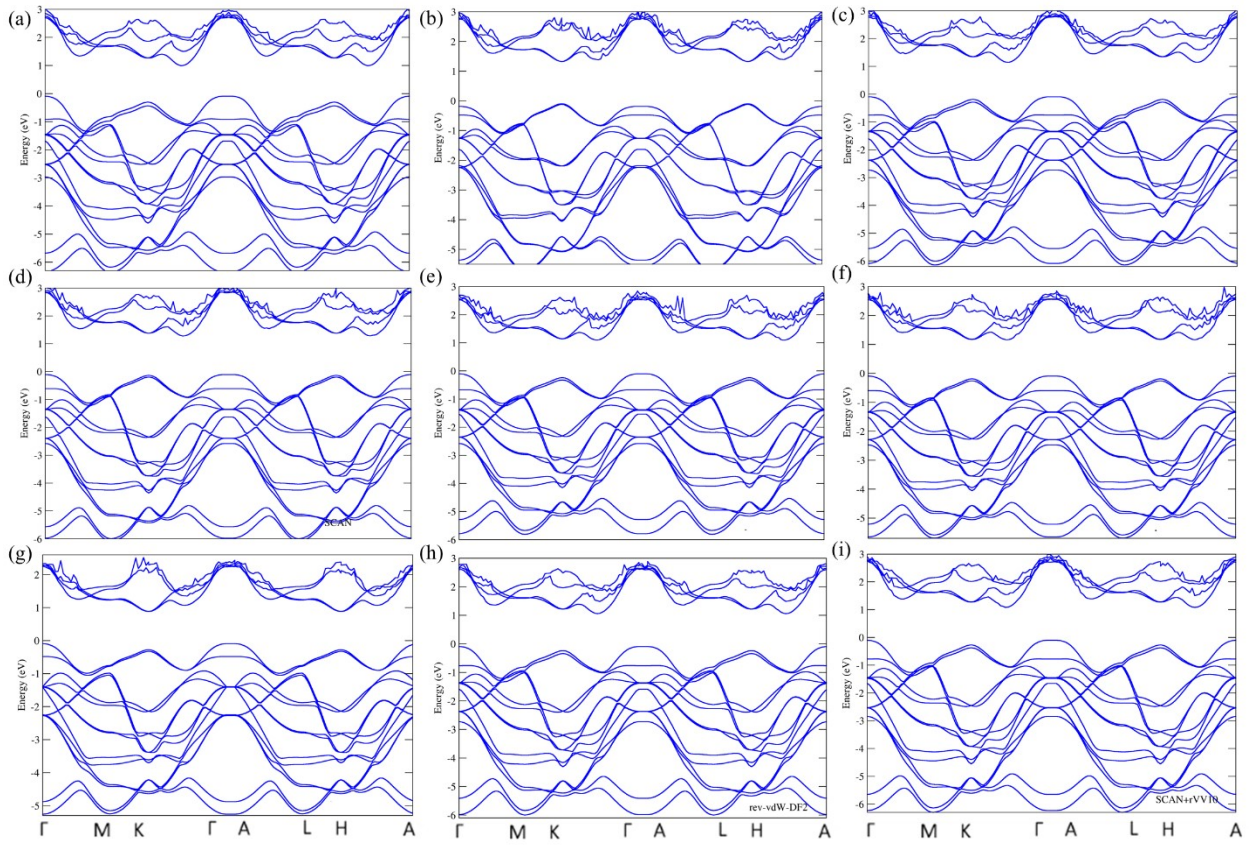

**Figure S3:** Band structures of 1T phase of MoSe<sub>2</sub> for all 09 XC functional (a) LDA, (b) PBE, (c) PBEsol, (d) SCAN, (e) optB88-vdW, (f) optPBE-vdW, (g) vdW-DF2, (h) rev-vdW-DF2 and (i) SCAN+rVV10.

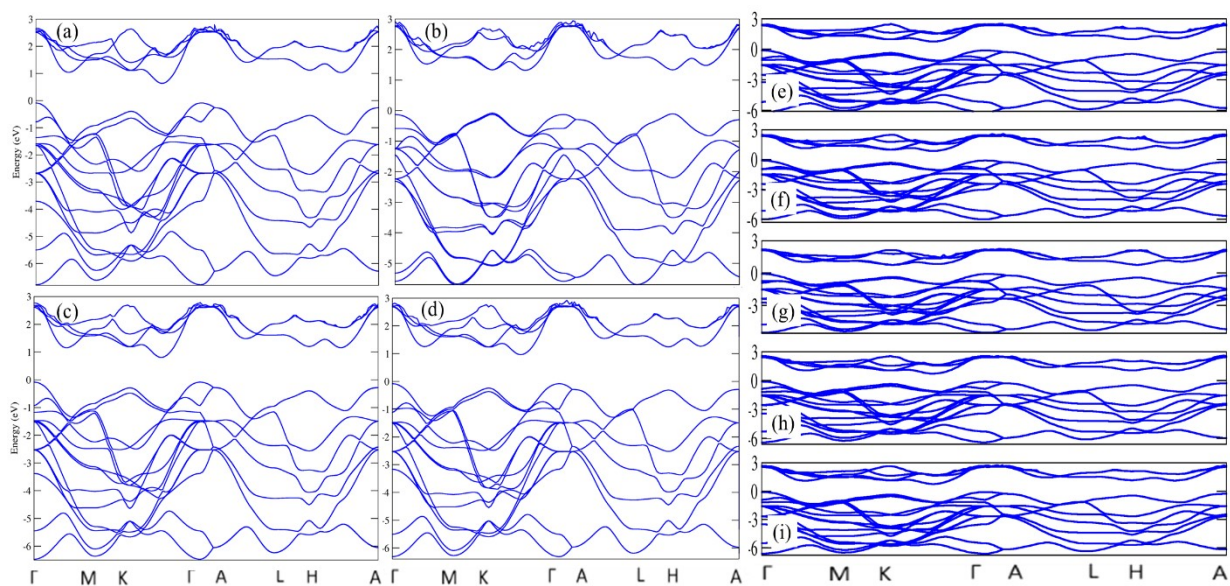

**Figure S4:** Band structures of 2H phase of MoSe<sub>2</sub> for all 09 XC functional (a) LDA, (b) PBE, (c) PBEsol, (d) SCAN, (e) optB88-vdW, (f) optPBE-vdW, (g) vdW-DF2, (h) rev-vdW-DF2 and (i) SCAN+rVV10.

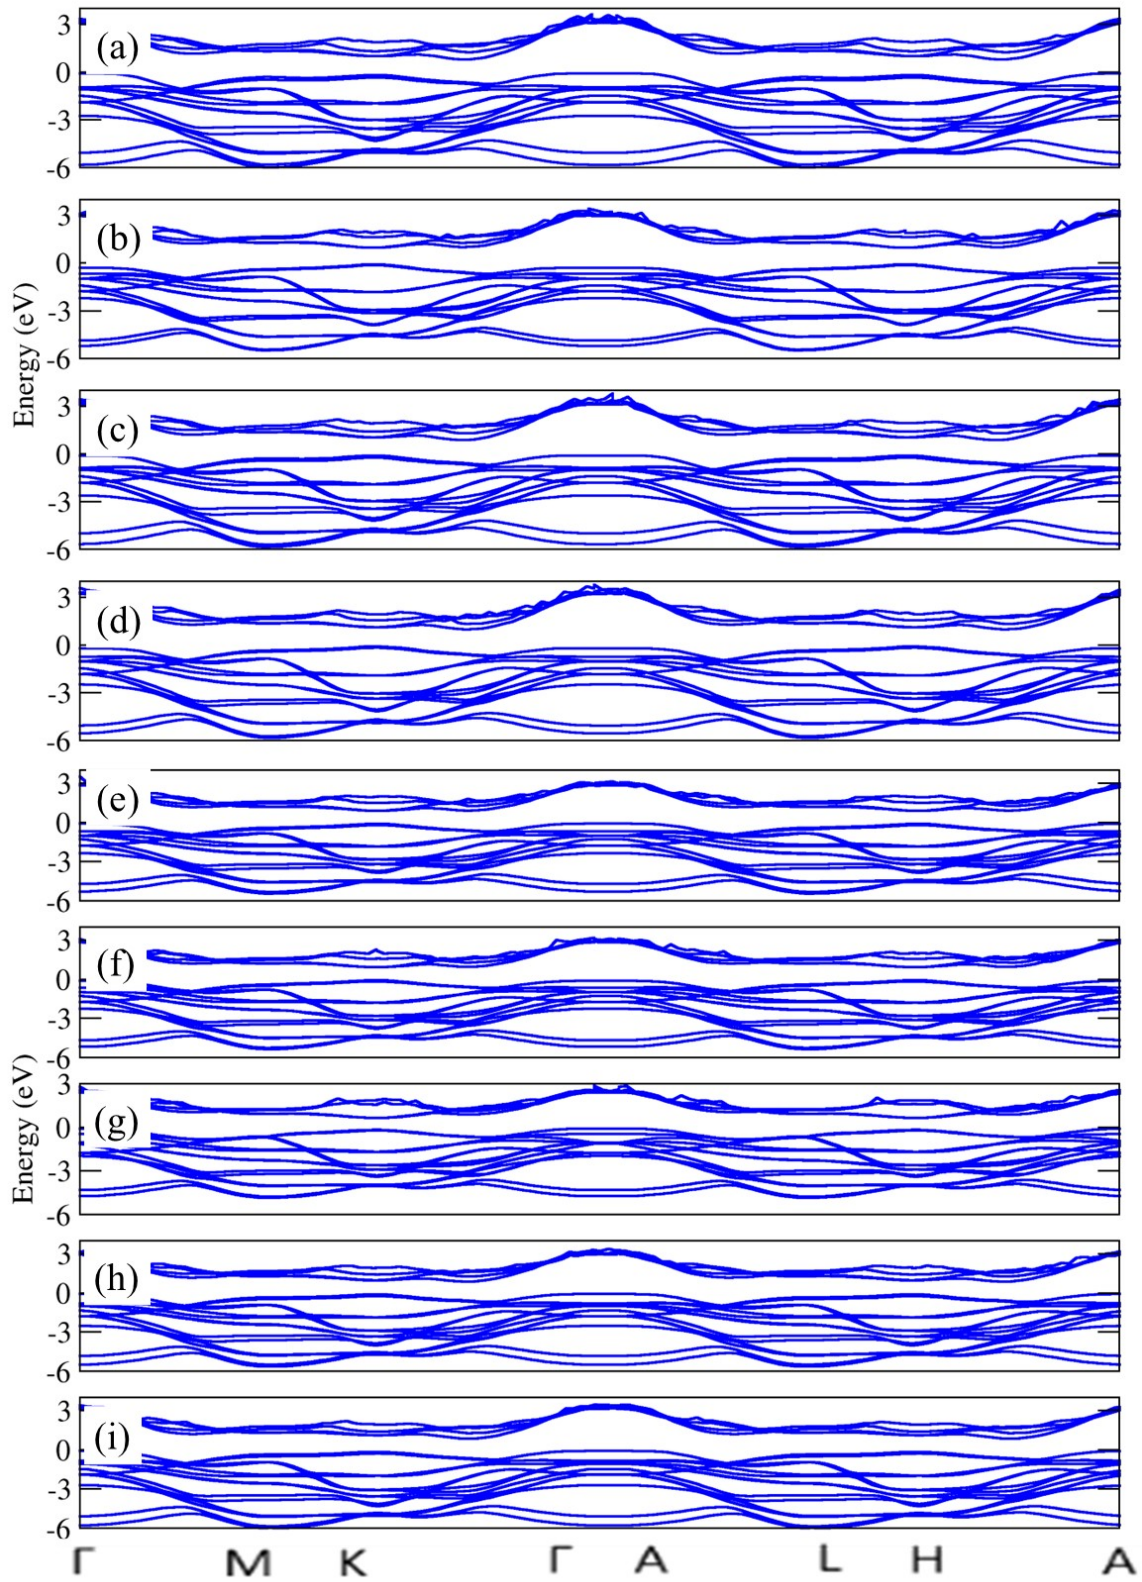

**Figure S5:** Band structures of 1T phase of MoTe<sub>2</sub> for all 09 XC functional ((a) LDA, (b) PBE, (c) PBEsol, (d) SCAN, (e) optB88-vdW, (f) optPBE-vdW, (g) vdW-DF2, (h) rev-vdW-DF2 and (i) SCAN+rVV10).

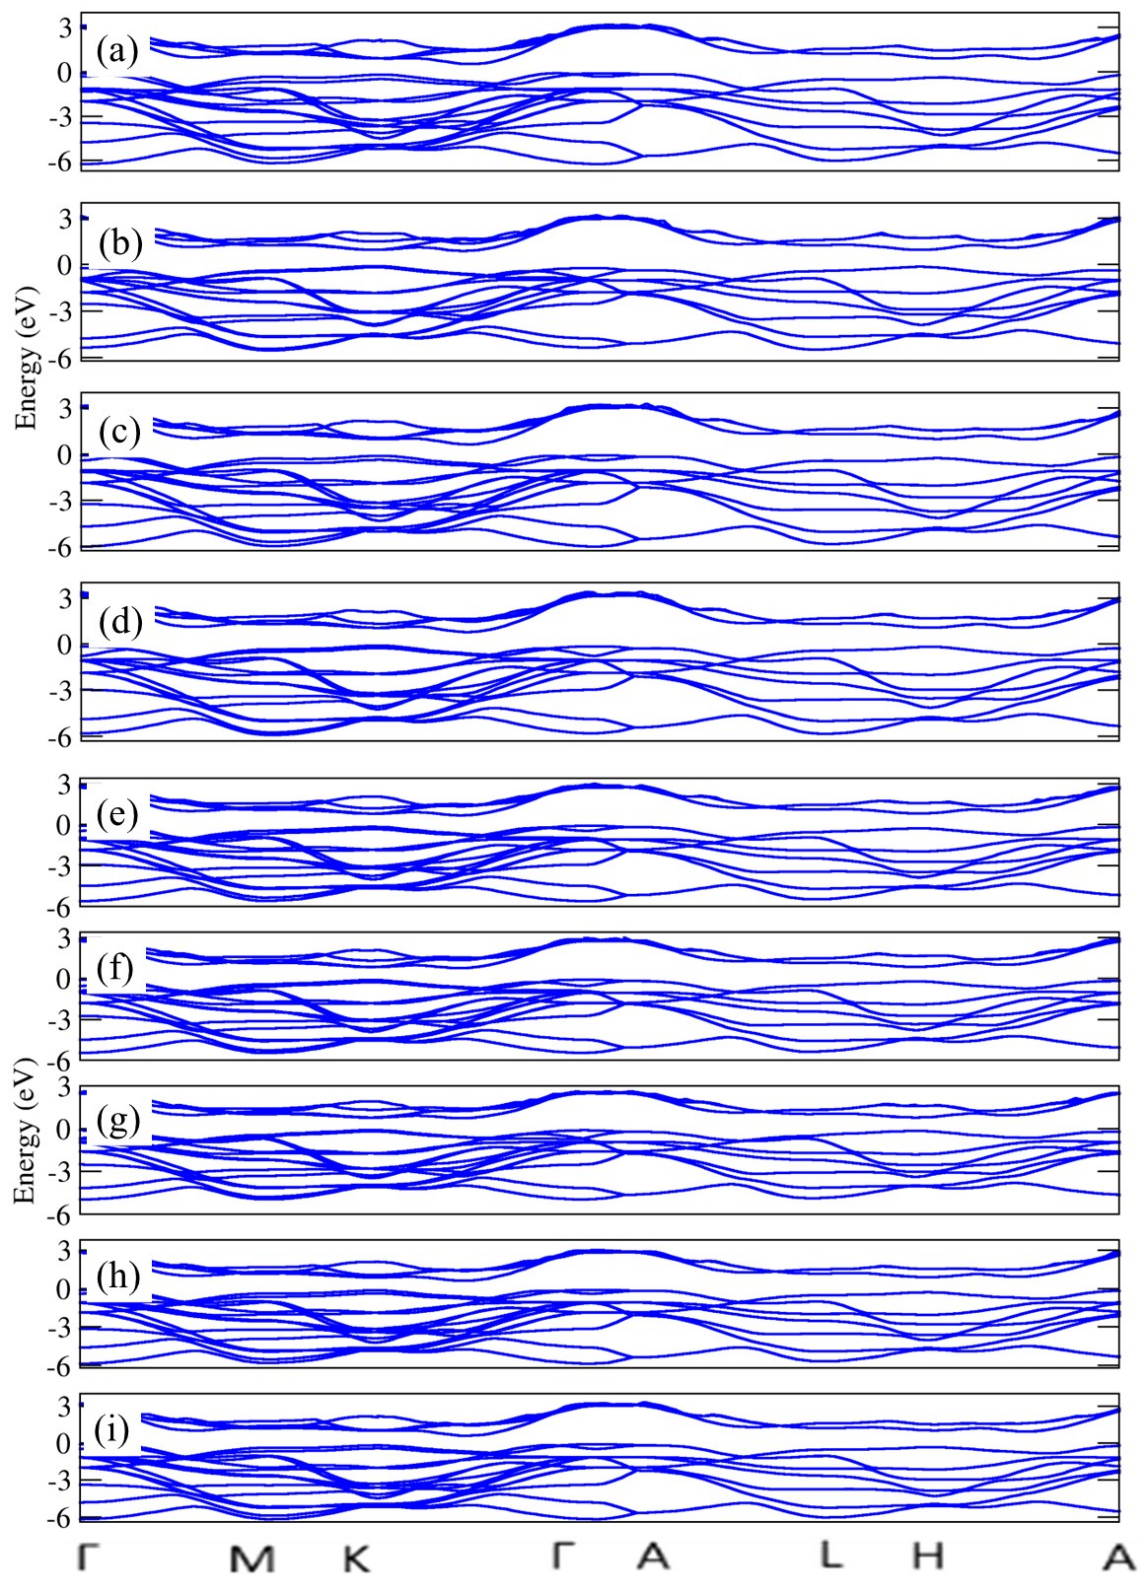

**Figure S6:** Band structures of 2H phase of  $\text{MoTe}_2$  for all 09 XC functional (a) LDA, (b) PBE, (c) PBESol, (d) SCAN, (e) optB88-vdW, (f) optPBE-vdW, (g) vdW-DF2, (h) rev-vdW-DF2 and (i) SCAN+rVV10.

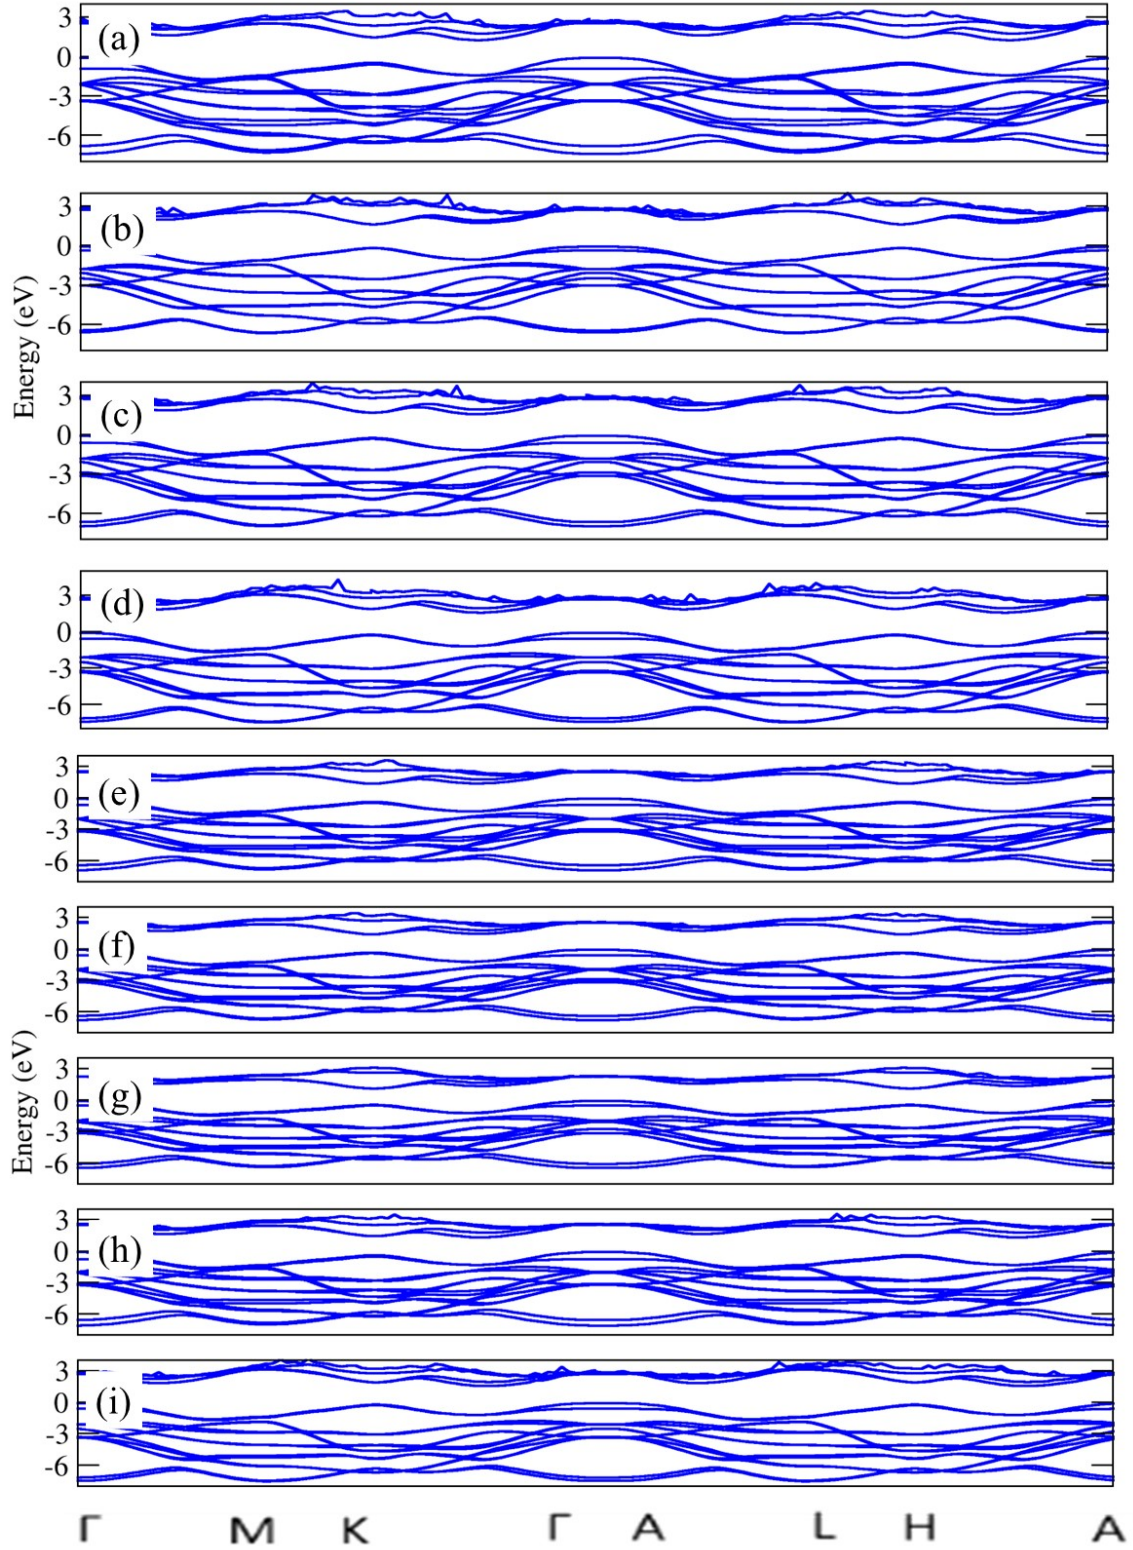

**Figure S7:** Band structures of 1T phase of  $\text{WS}_2$  for all 09 XC functional (a) LDA, (b) PBE, (c) PBESol, (d) SCAN, (e) optB88-vdW, (f) optPBE-vdW, (g) vdW-DF2, (h) rev-vdW-DF2 and (i) SCAN+rVV10.

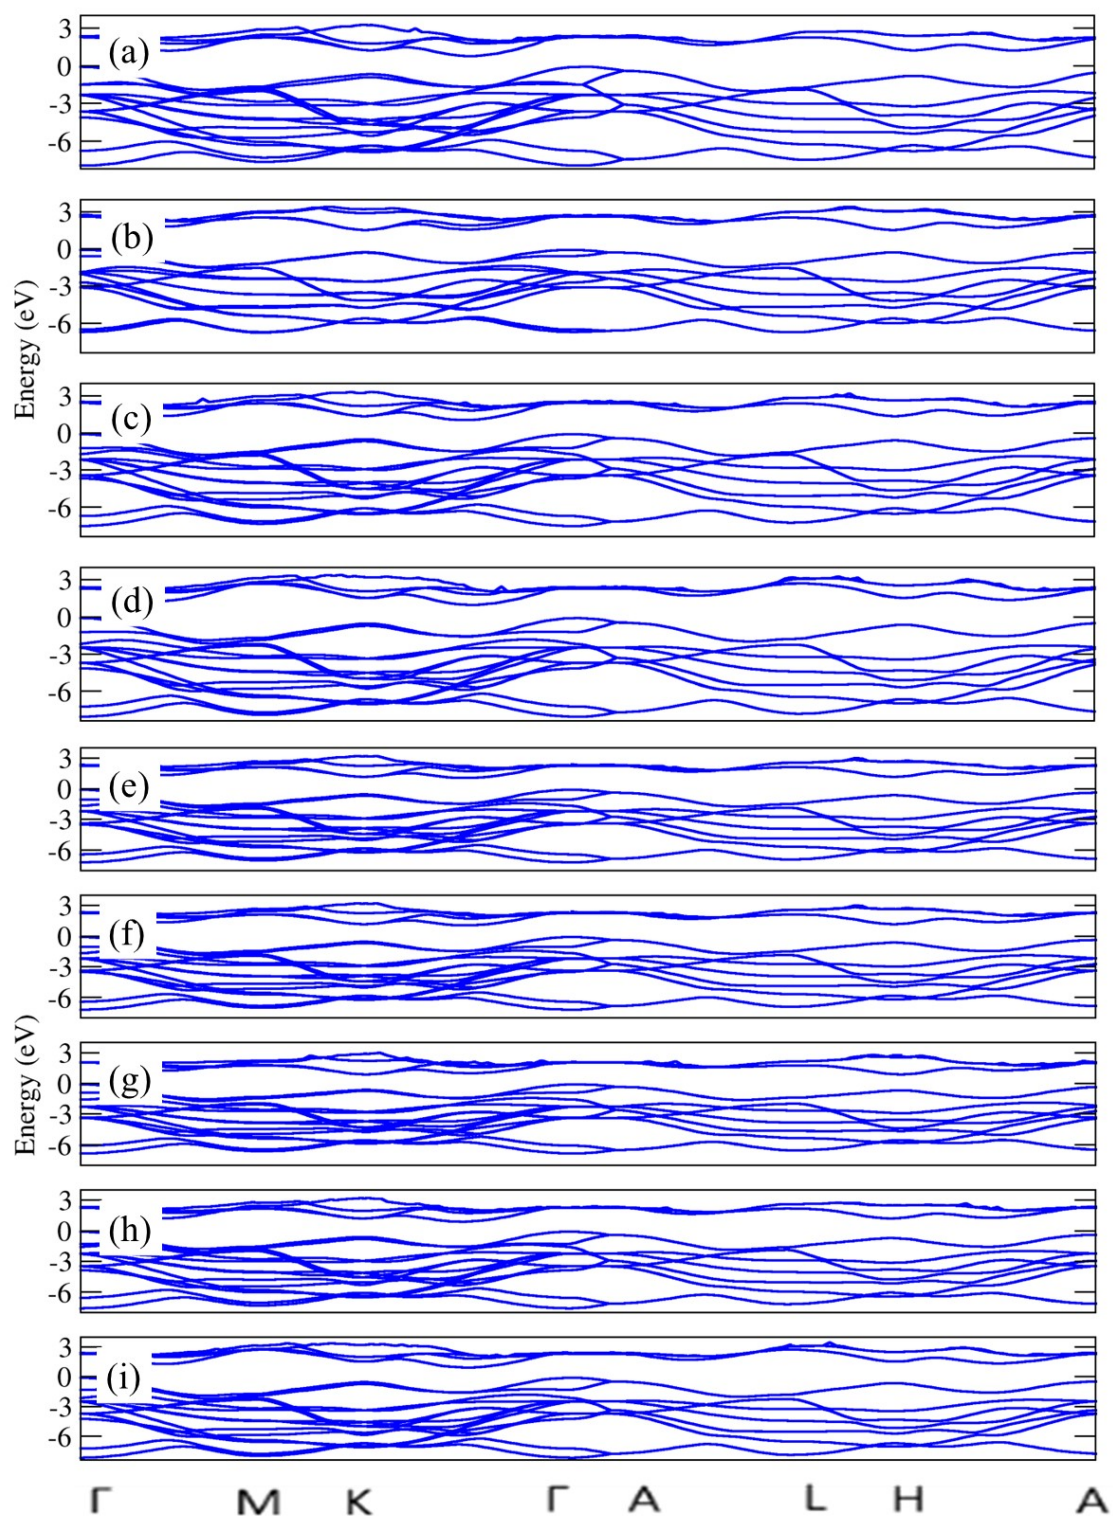

**Figure S8:** Band structures of 2H phase of  $\text{WS}_2$  for all 09 XC functional (a) LDA, (b) PBE, (c) PBESol, (d) SCAN, (e) optB88-vdW, (f) optPBE-vdW, (g) vdW-DF2, (h) rev-vdW-DF2 and (i) SCAN+rVV10.

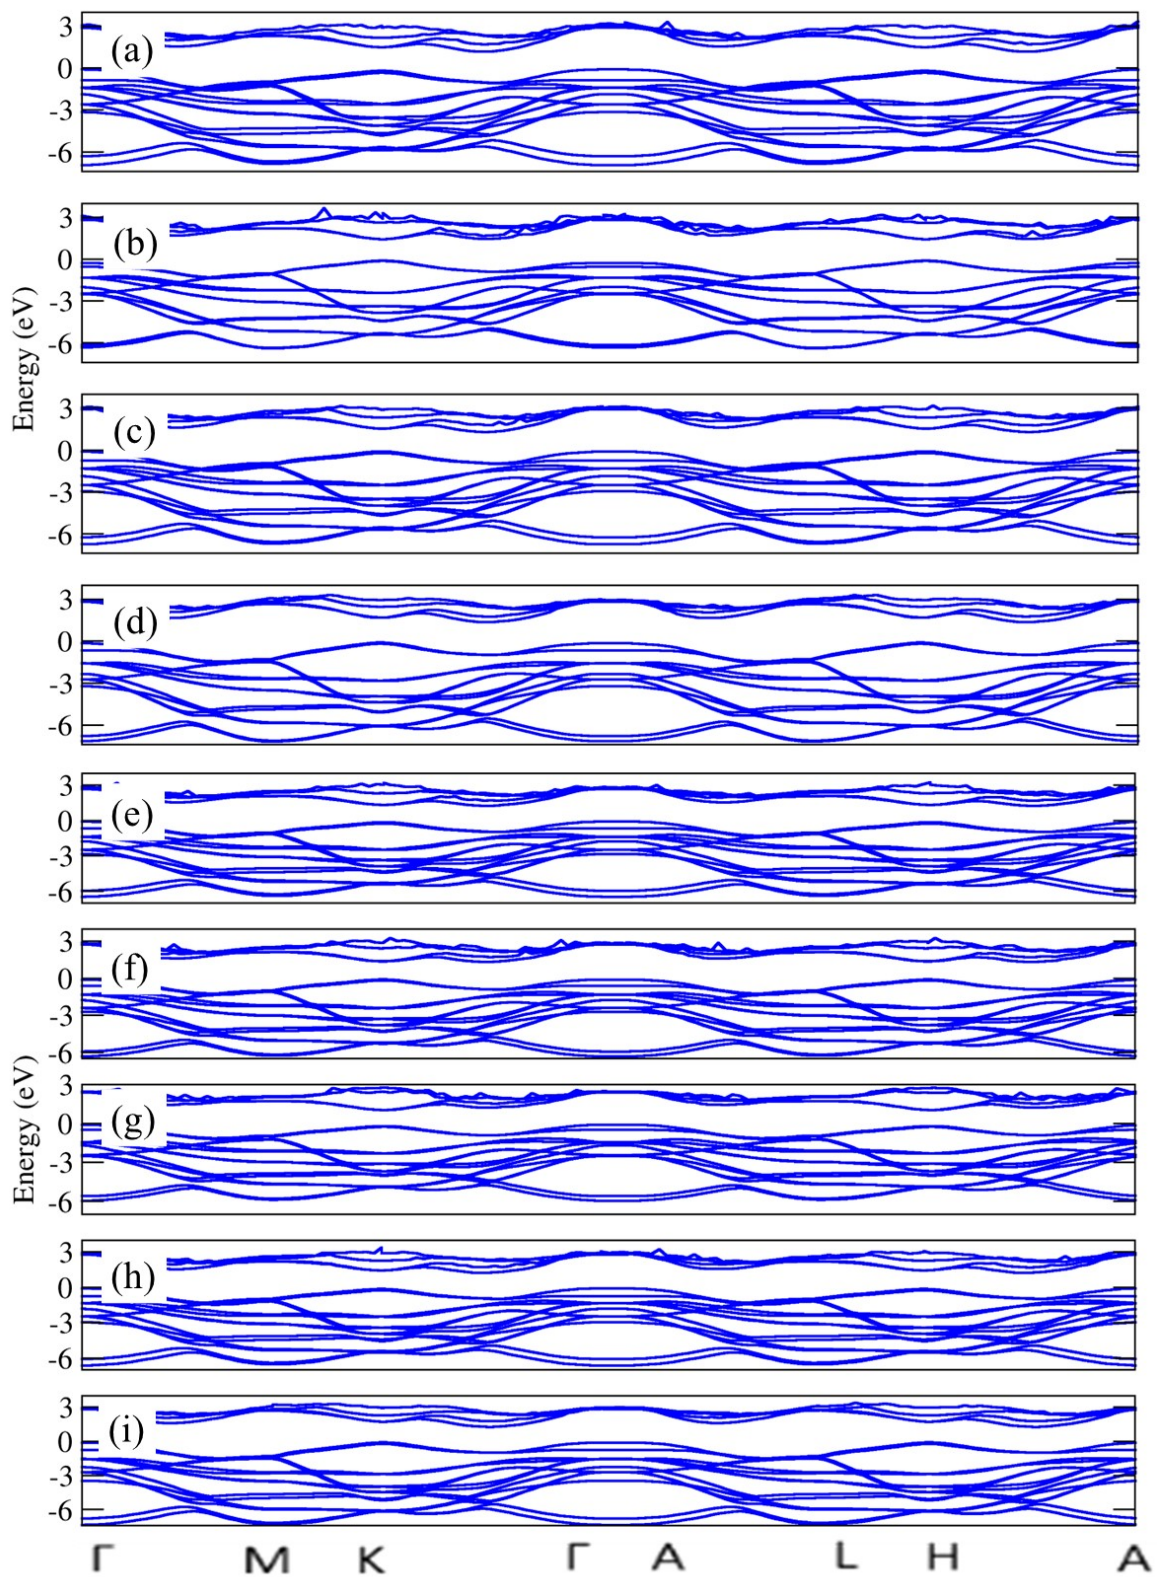

**Figure S9:** Band structures of 1T phase of  $\text{WSe}_2$  for all 09 XC functional (a) LDA, (b) PBE, (c) PBEsol, (d) SCAN, (e) optB88-vdW, (f) optPBE-vdW, (g) vdW-DF2, (h) rev-vdW-DF2 and (i) SCAN+rVV10.



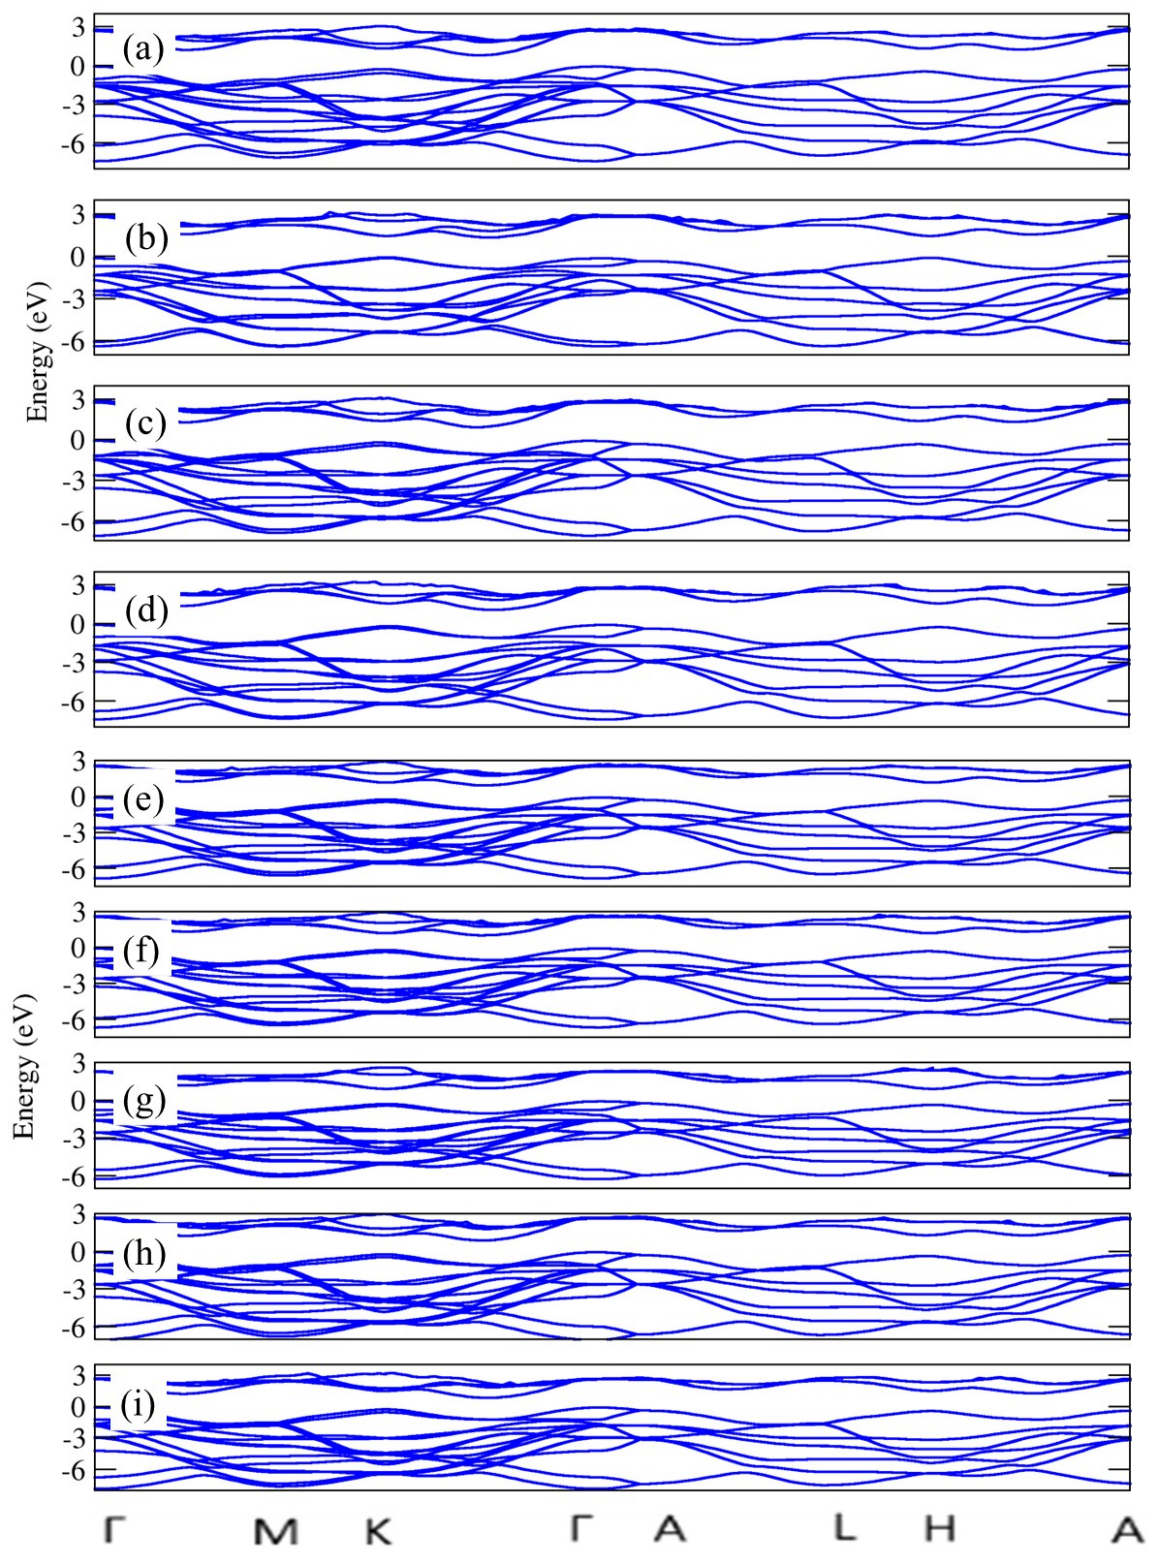

**Figure S10:** Band structures of 2H phase of WSe<sub>2</sub> for all 09 XC functional (a) LDA, (b) PBE, (c) PBESol, (d) SCAN, (e) optB88-vdW, (f) optPBE-vdW, (g) vdW-DF2, (h) rev-vdW-DF2 and (i) SCAN+rVV10.

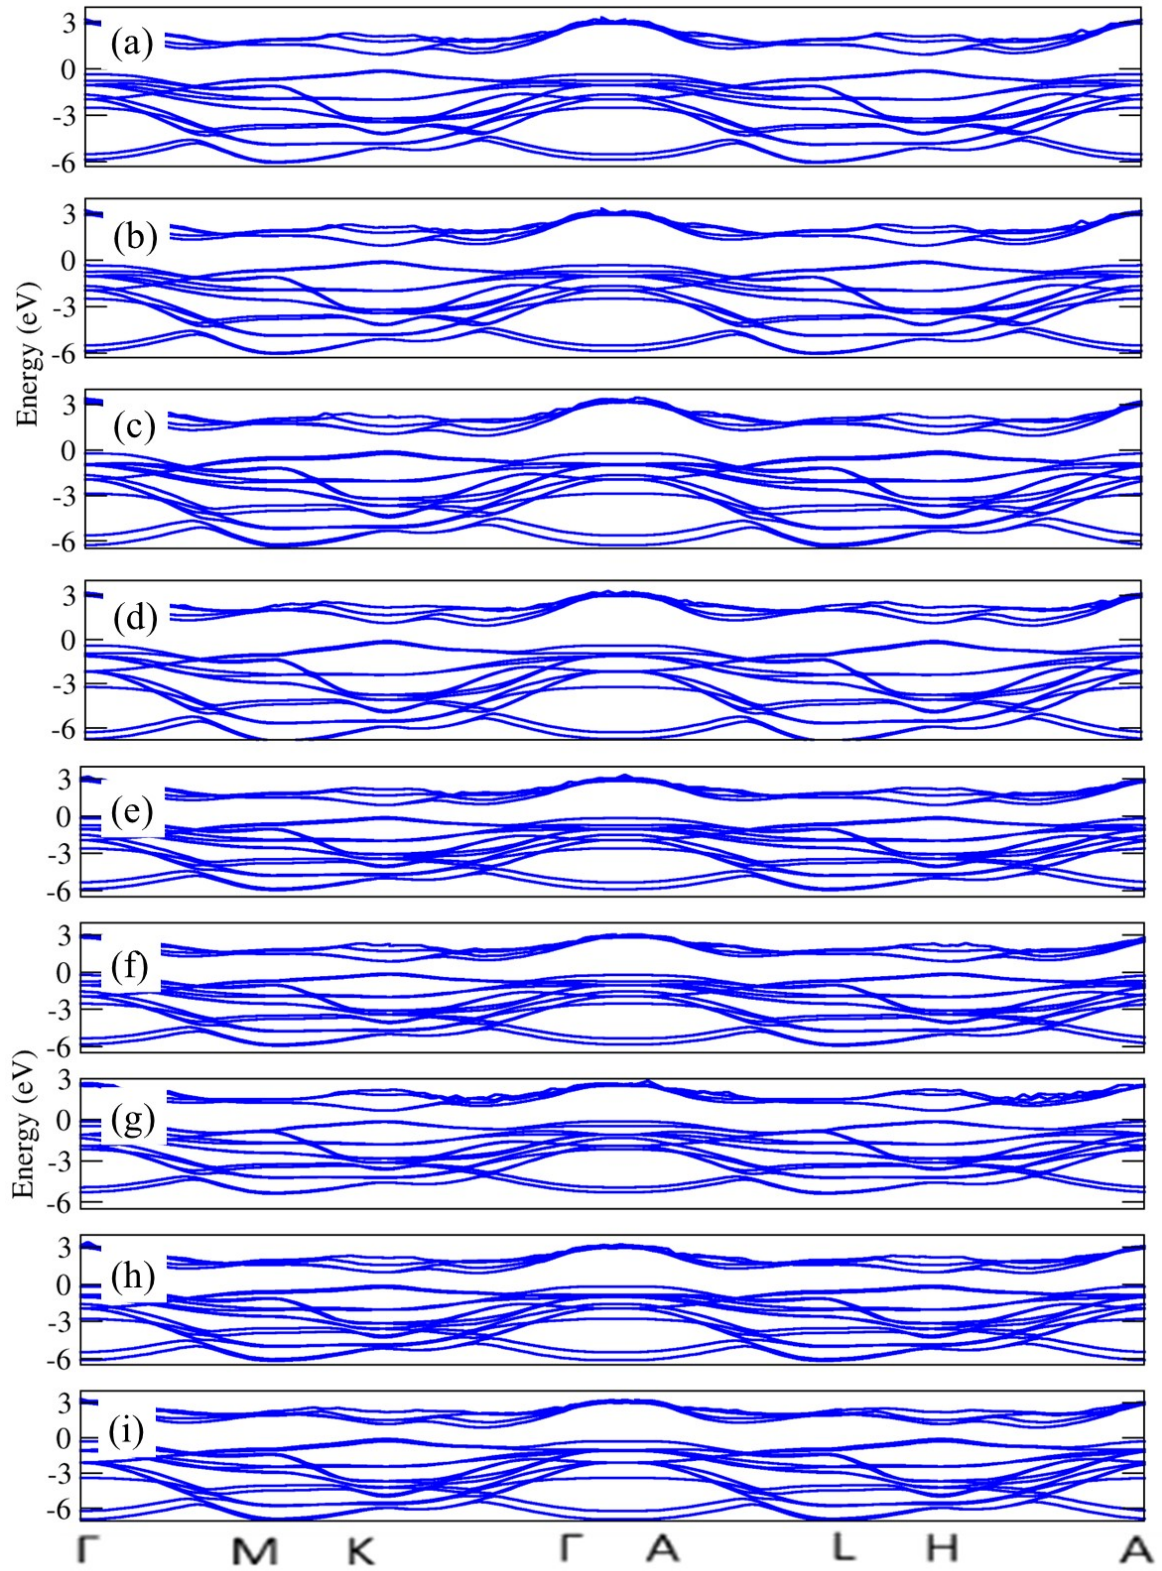

**Figure S11:** Band structures of 1T phase of  $\text{WTe}_2$  for all 09 XC functional (a) LDA, (b) PBE, (c) PBESol, (d) SCAN, (e) optB88-vdW, (f) optPBE-vdW, (g) vdW-DF2, (h) rev-vdW-DF2 and (i) SCAN+rVV10.

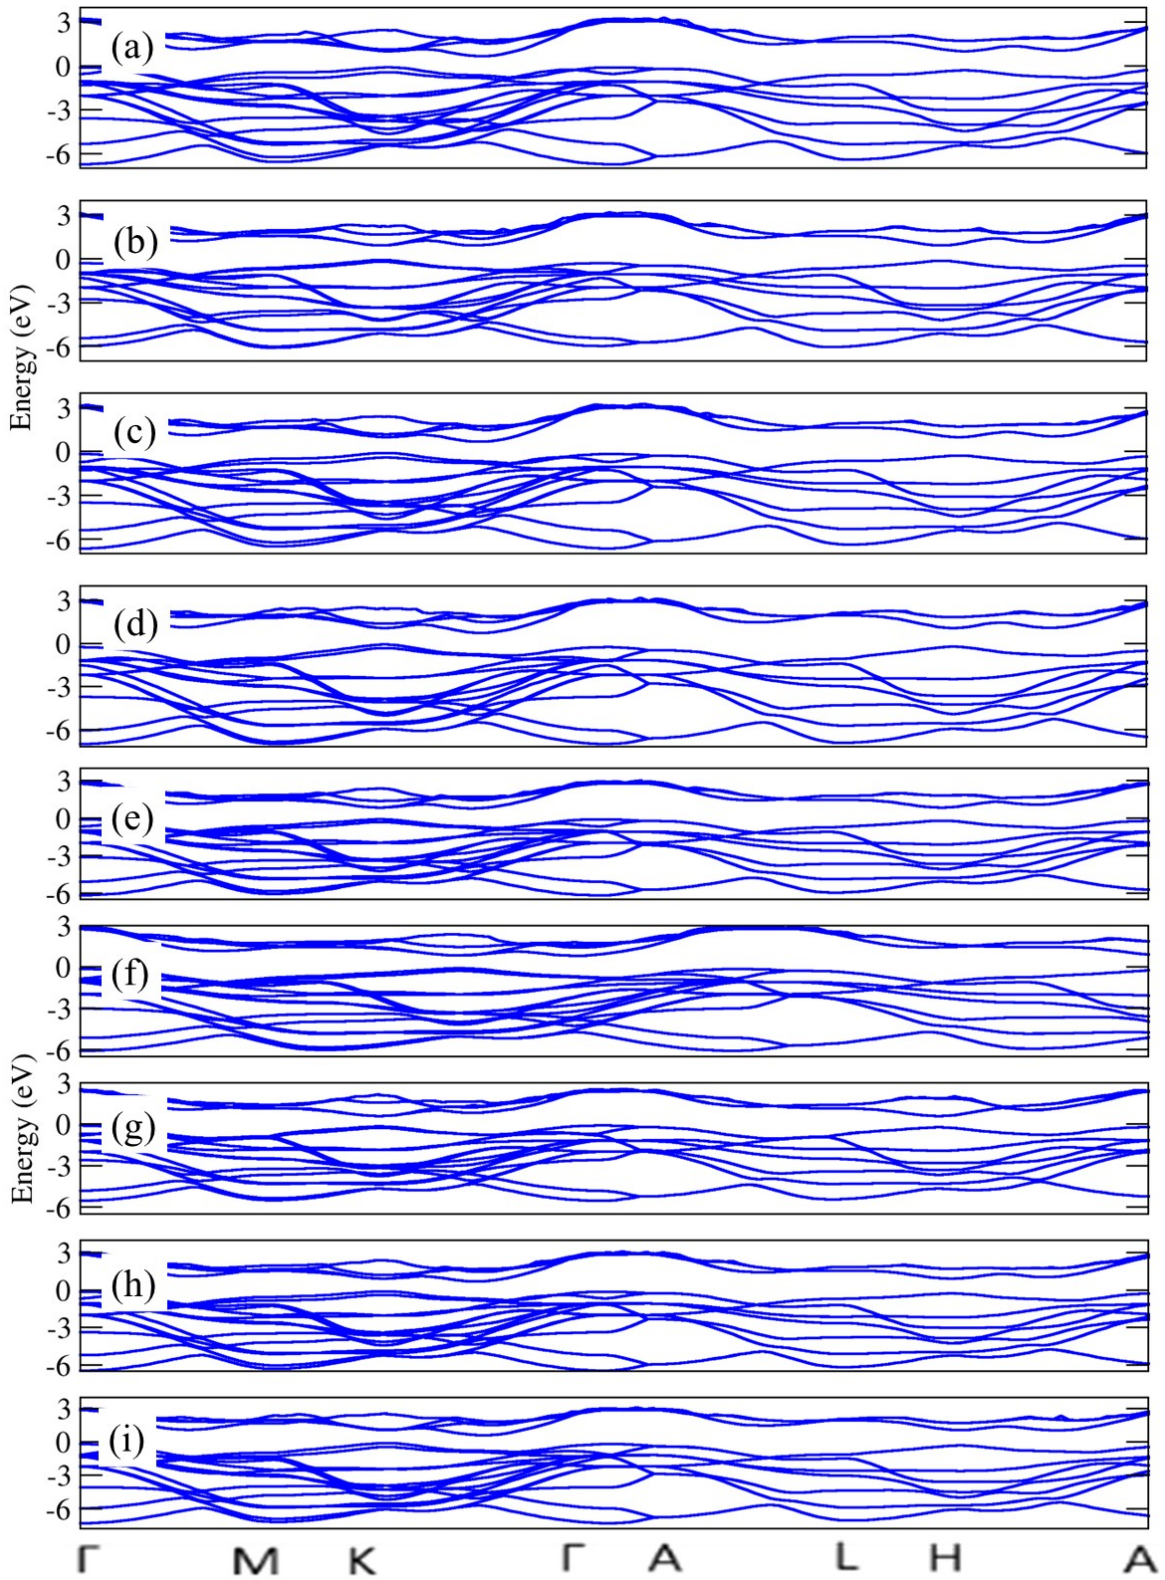

**Figure S12:** Band structures of 2H phase of  $\text{WTe}_2$  for all 09 XC functional (a) LDA, (b) PBE, (c) PBESol, (d) SCAN, (e) optB88-vdW, (f) optPBE-vdW, (g) vdW-DF2, (h) rev-vdW-DF2 and (i) SCAN+rVV10.

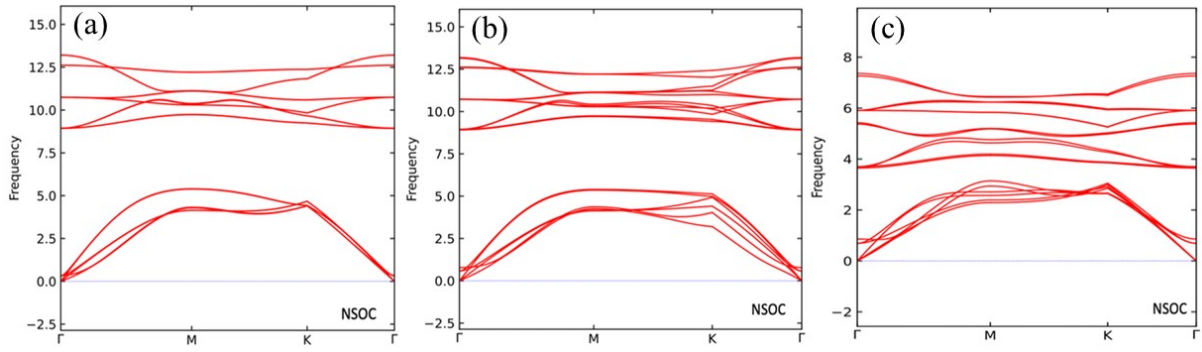

**Figure S13:** Phonon dispersion plot for 1T phase of  $\text{WS}_2$  (a), 2H phase of  $\text{WS}_2$  (b), and 2H phase of  $\text{WTe}_2$  (c) for PBESol XC functional in absence of SOC.

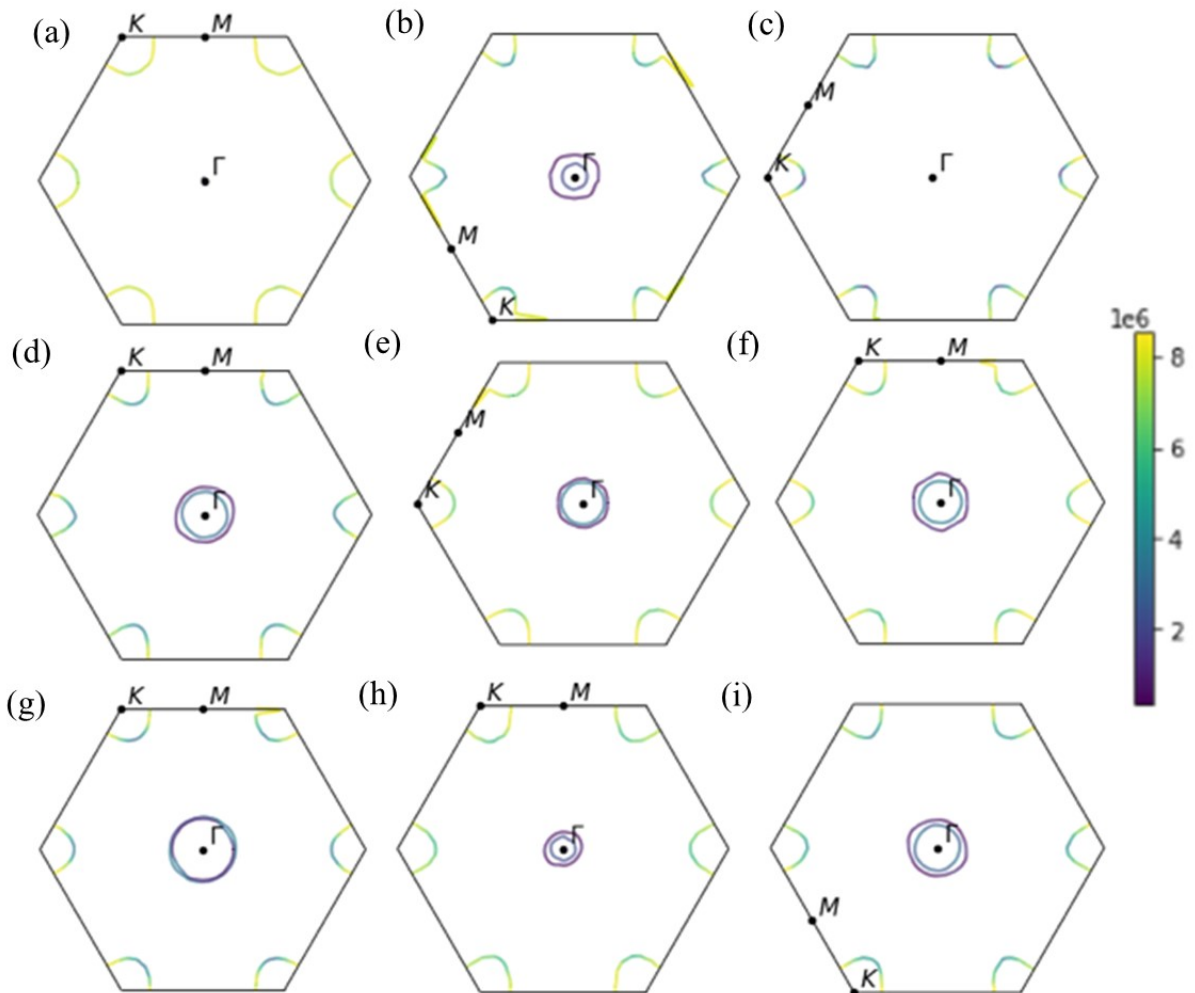

**Figure S14:** Fermi surface plots for 1T phase of  $\text{MoS}_2$  all 09 XC functional (a) LDA, (b) PBE, (c) PBESol, (d) SCAN, (e) optB88-vdW, (f) optPBE-vdW, (g) vdW-DF2, (h) rev-vdW-DF2 and (i) SCAN+rVV10 in absence of SOC.

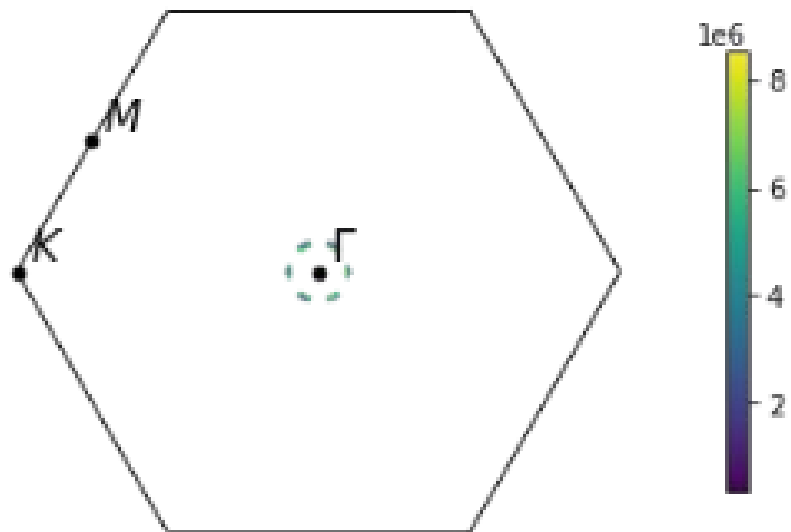

**Figure S15:** Fermi surface plots for 1T phase of WTe<sub>2</sub> for PBESol XC functional in absence of SOC.
