# Supplementary figures and images for: Structural characterization and functional assessment of exchange–correlation functionals in van der Waals TMDs AB2 (A = Mo, W; B = S, Se, Te)
Source: Royal Society of Chemistry journal article supplement (doi:10.1039/d4nj03862b), 2024-01-01

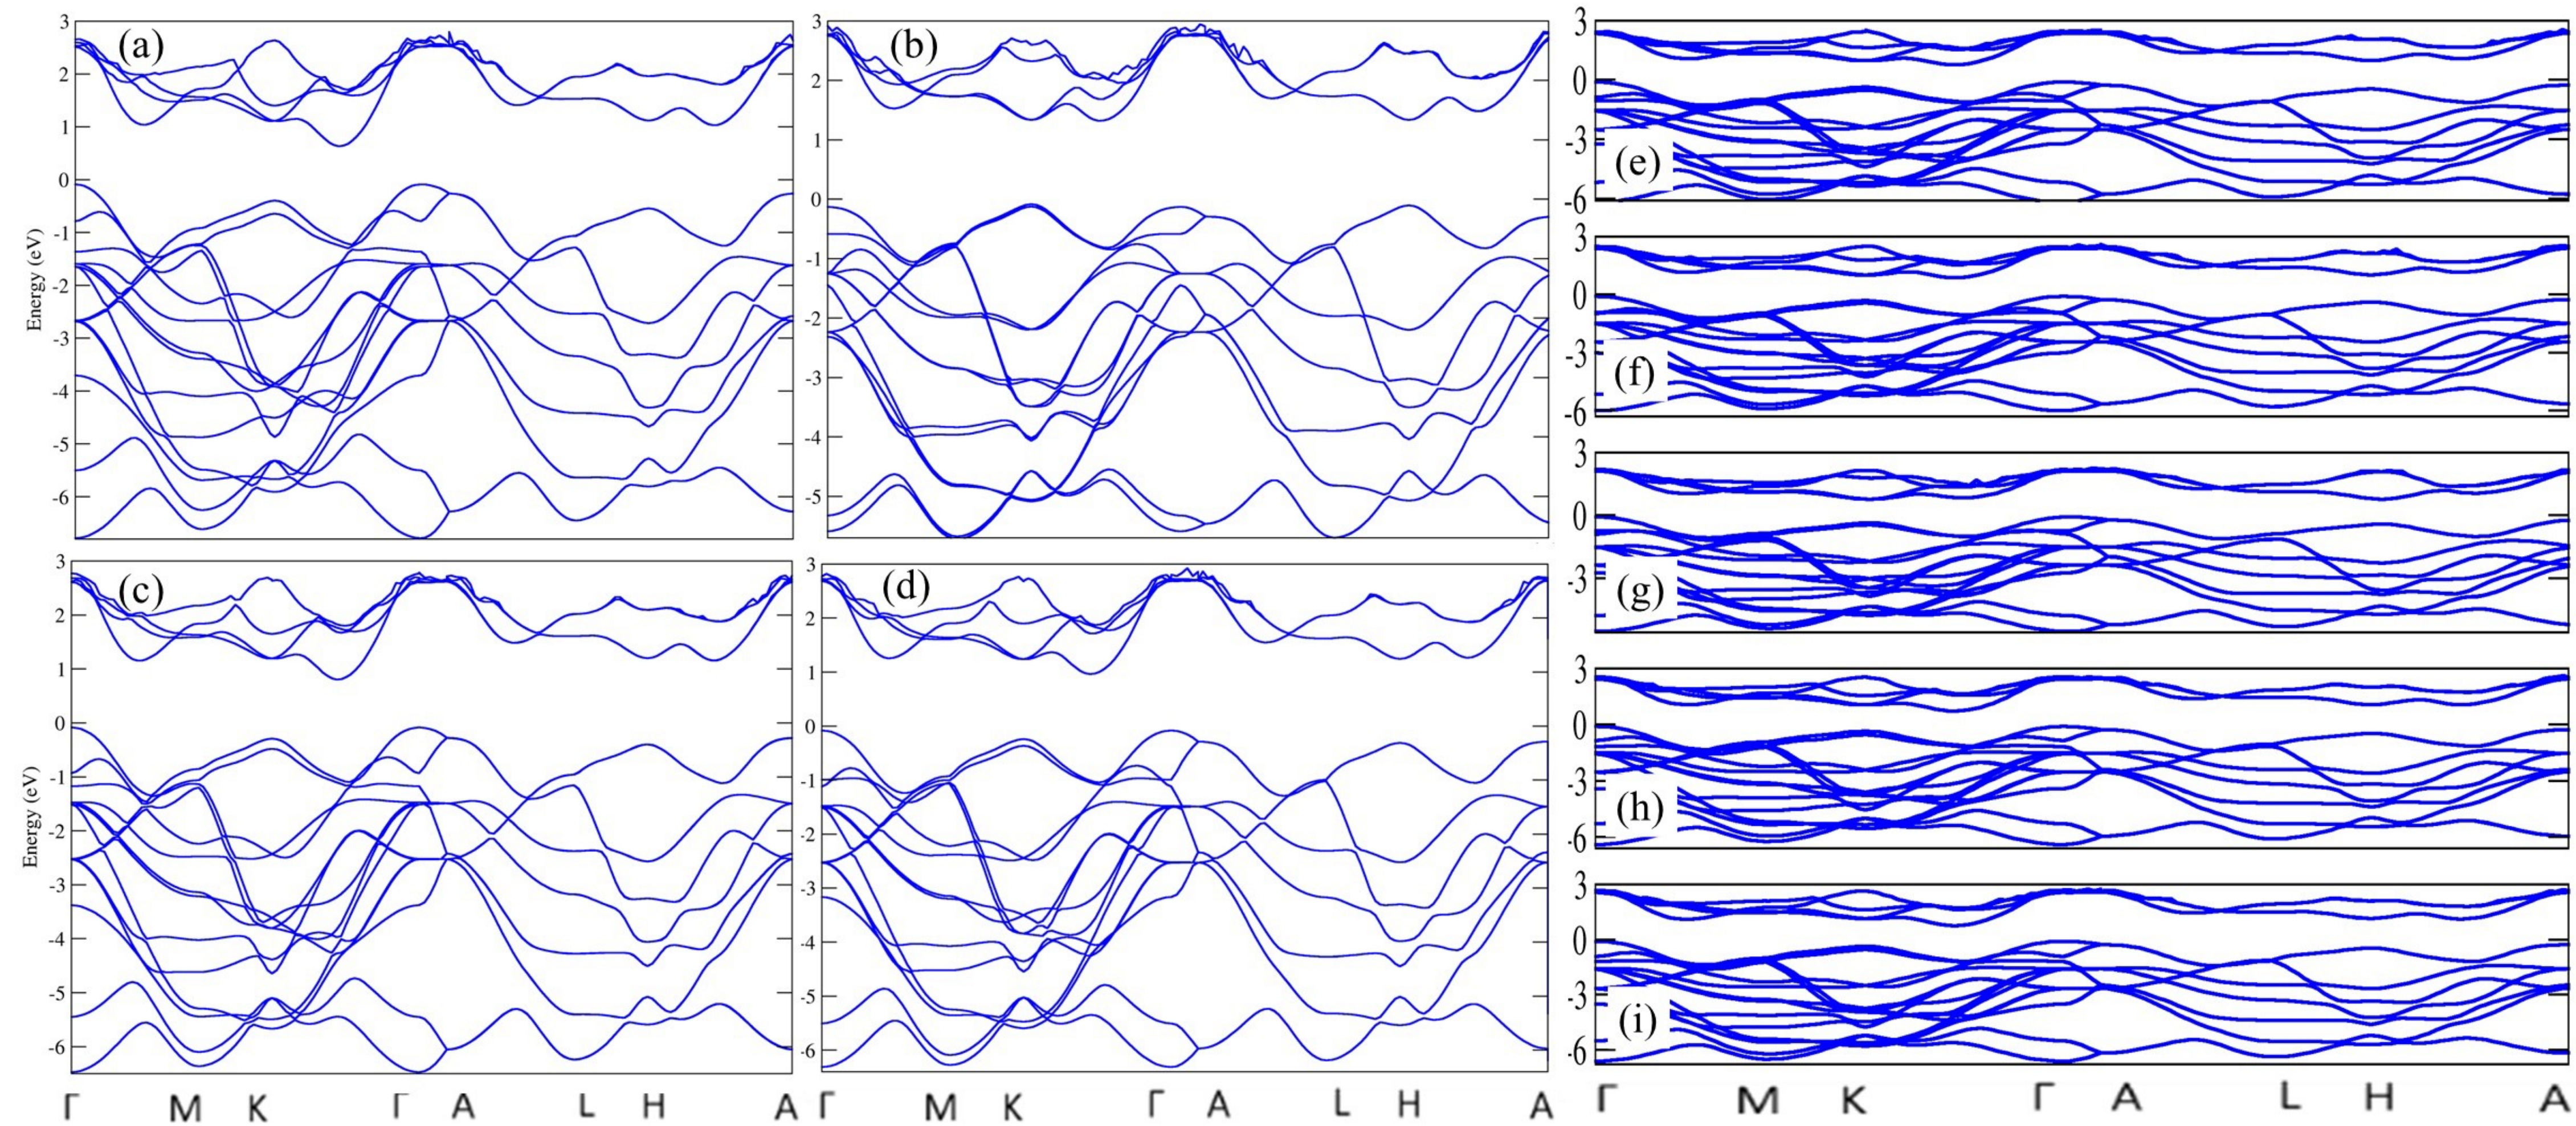

Supplement: d4nj03862b11.pdf [file d4nj03862b11.pdf]

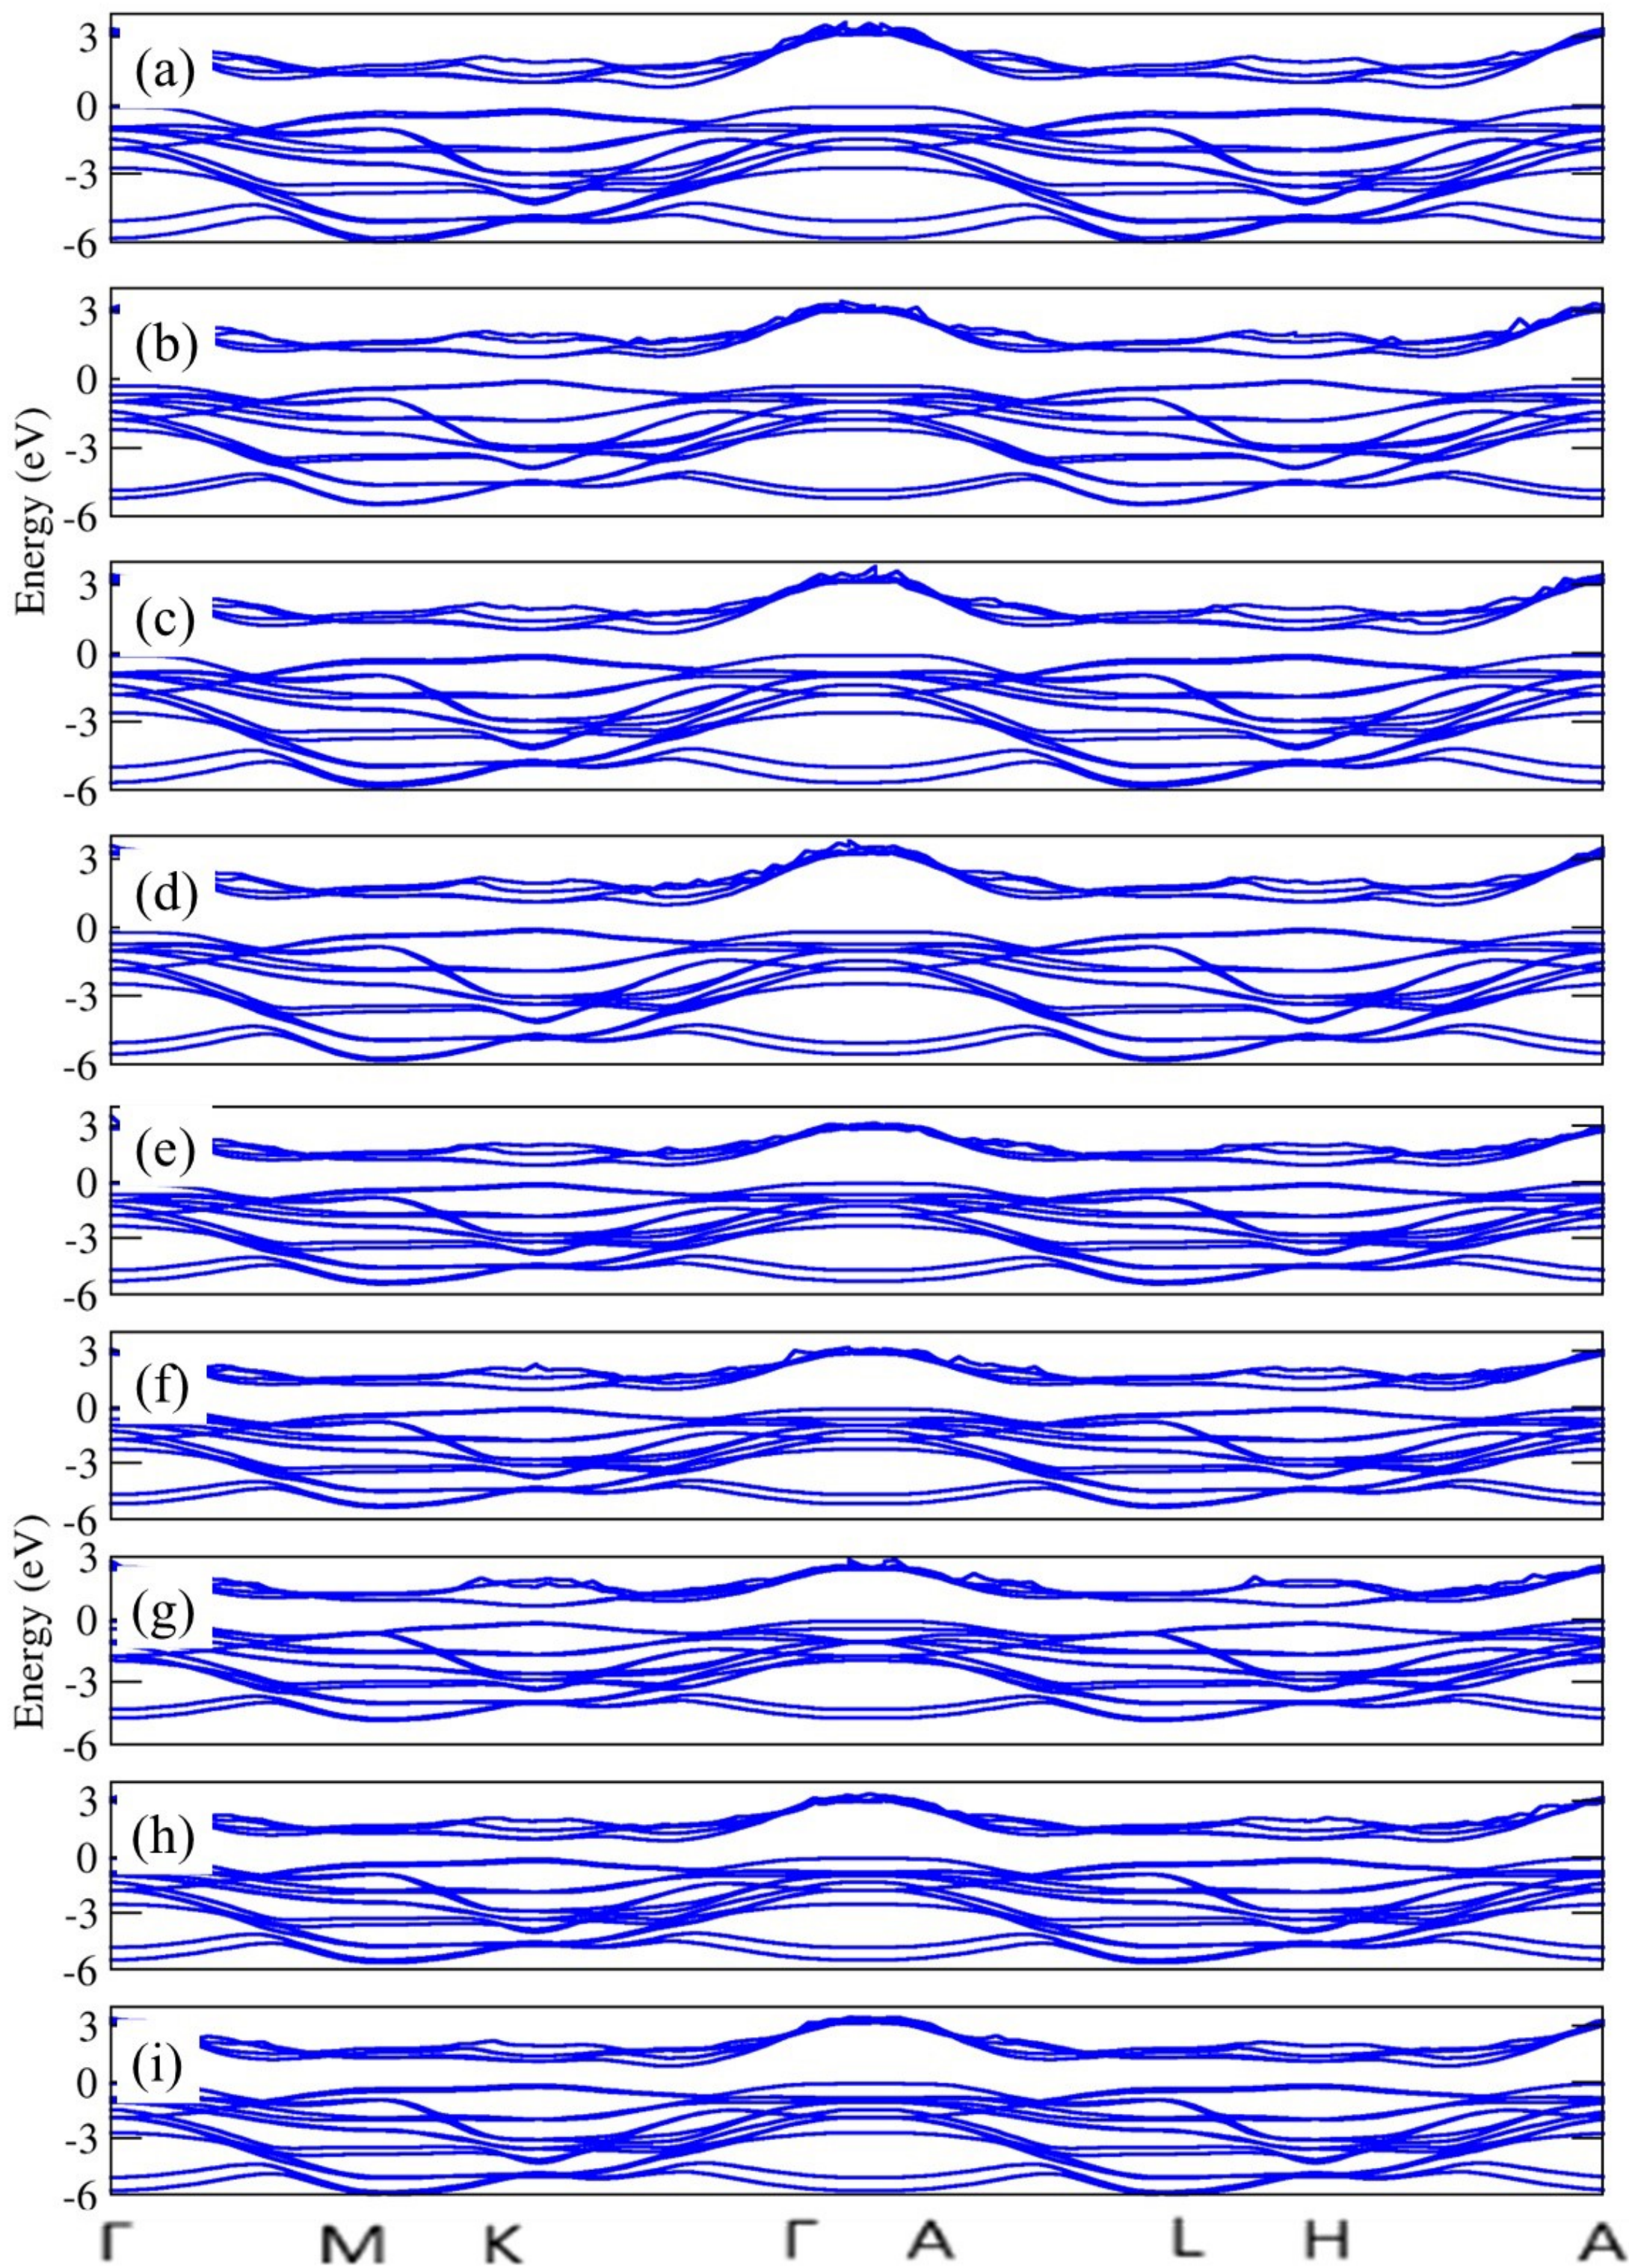

Supplement: d4nj03862b12.pdf [file d4nj03862b12.pdf]

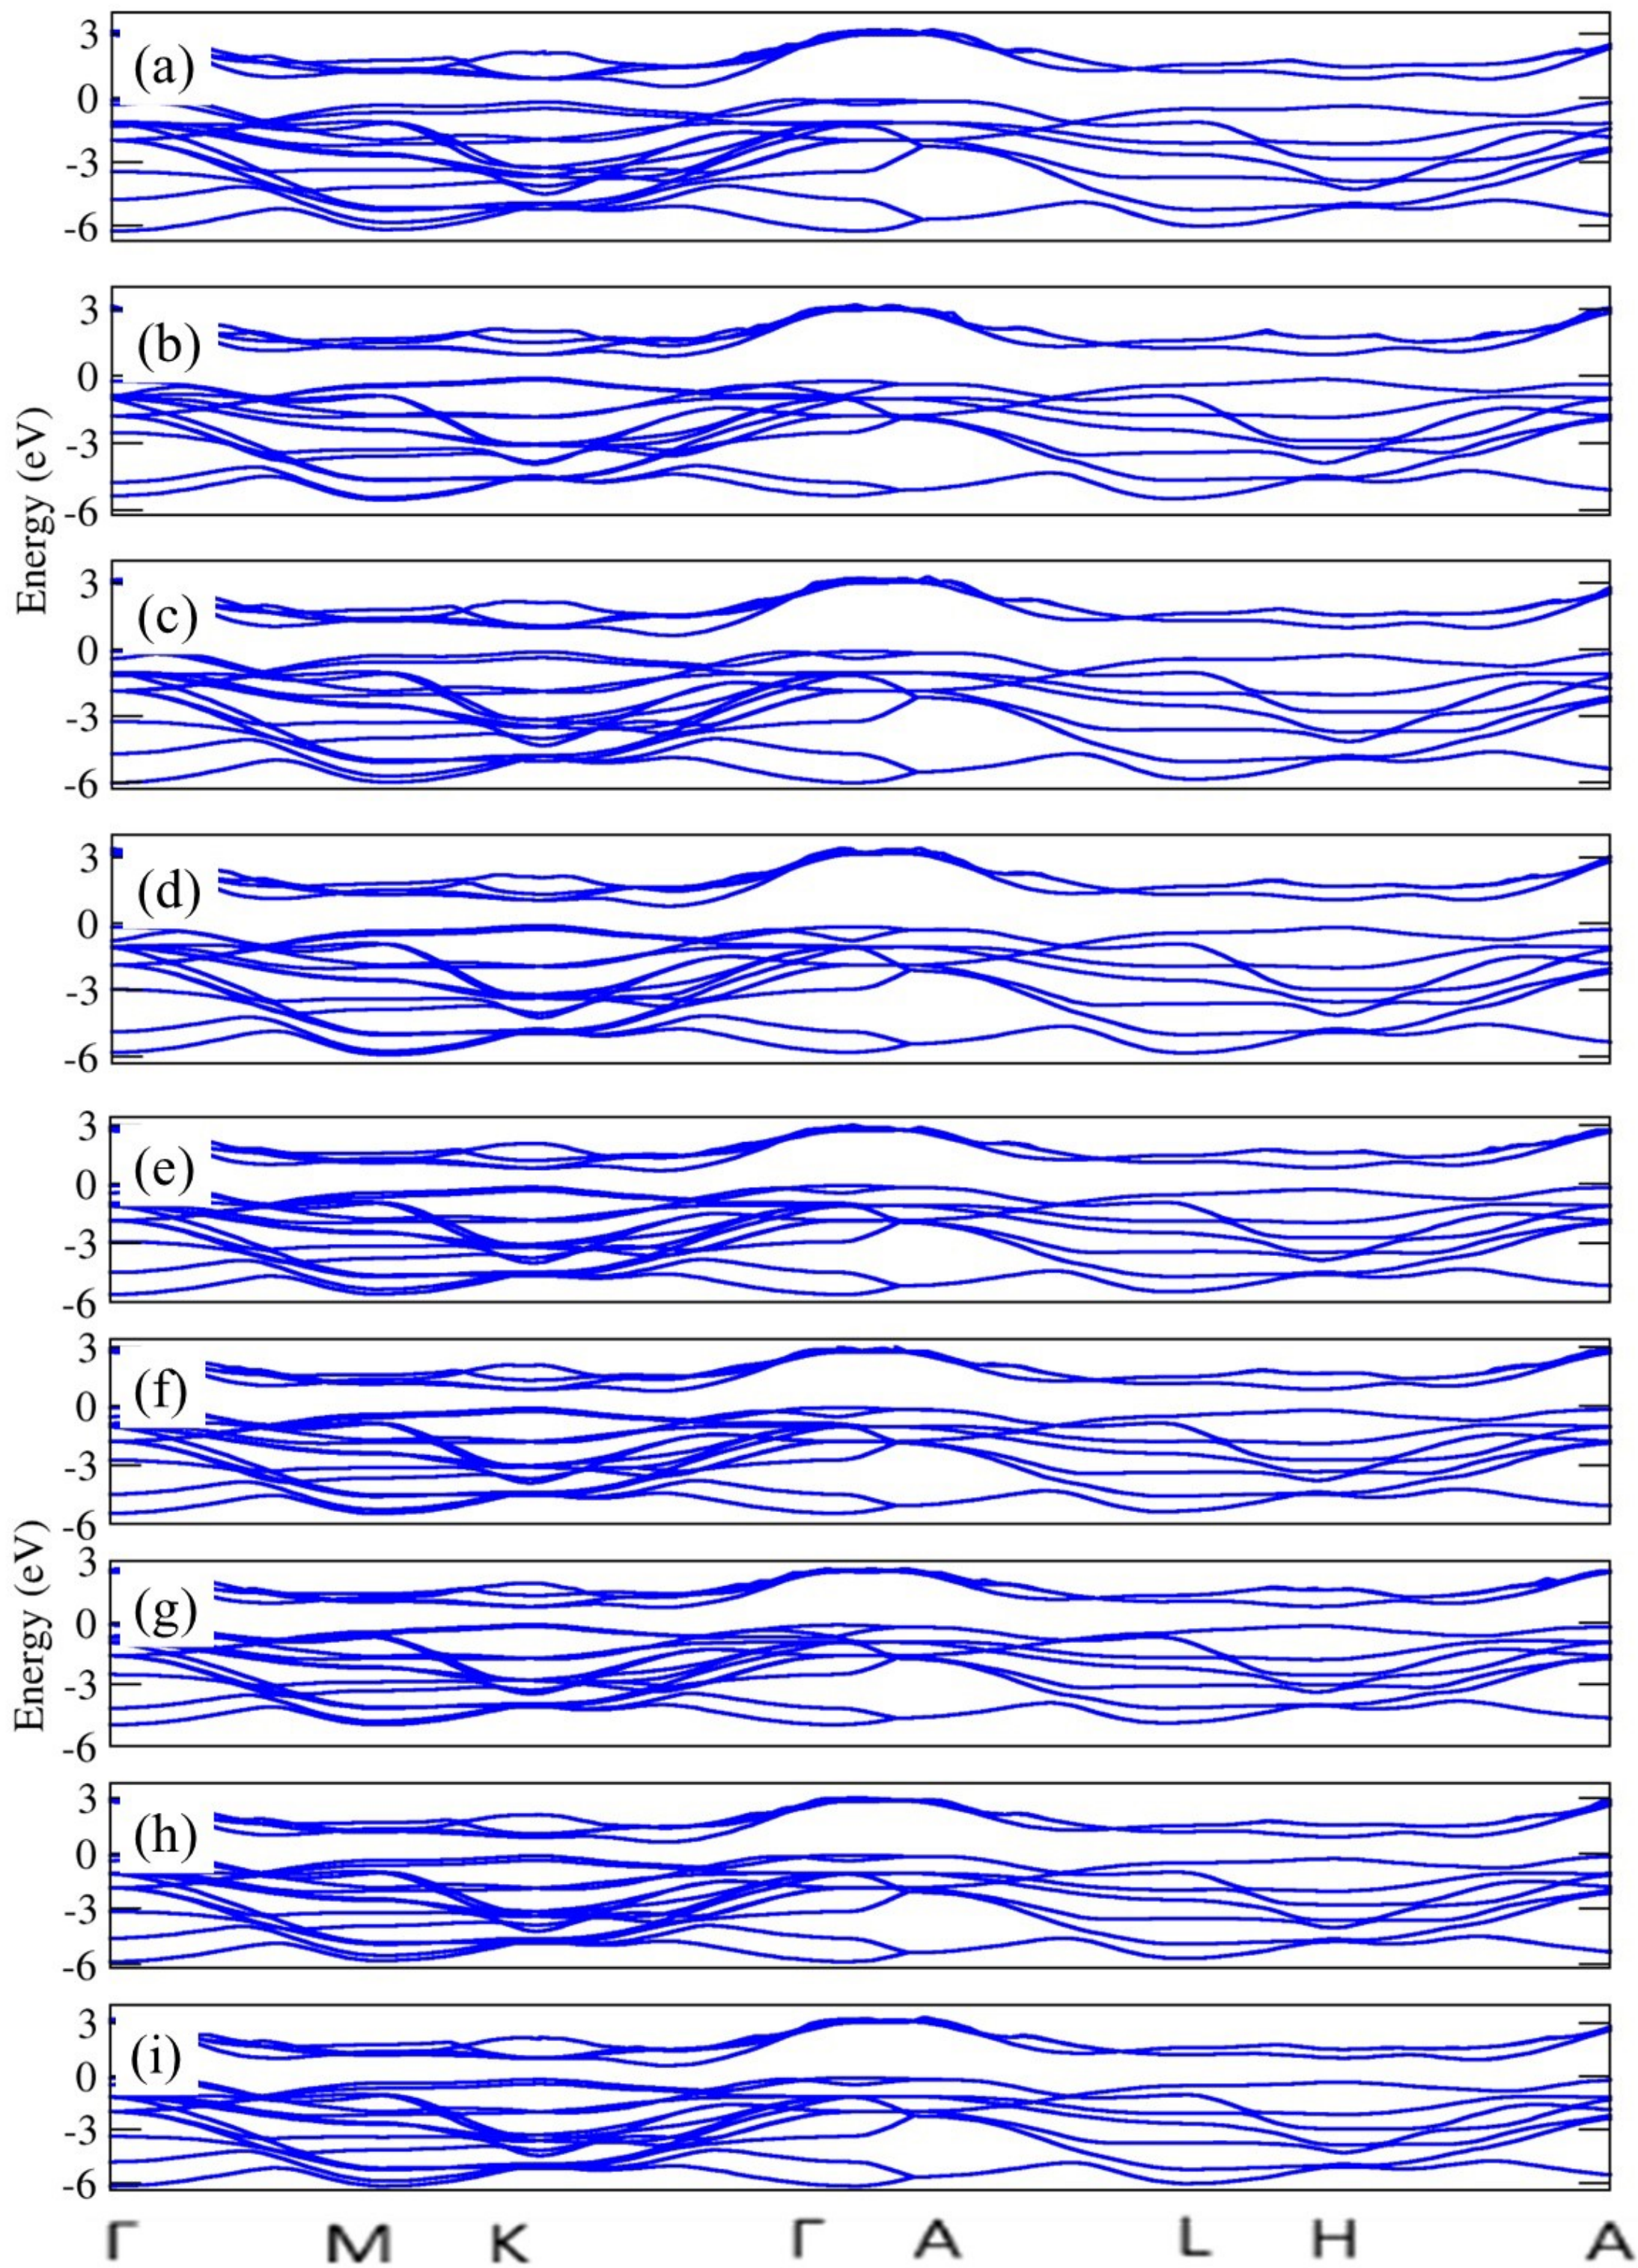

Supplement: d4nj03862b13.pdf [file d4nj03862b13.pdf]

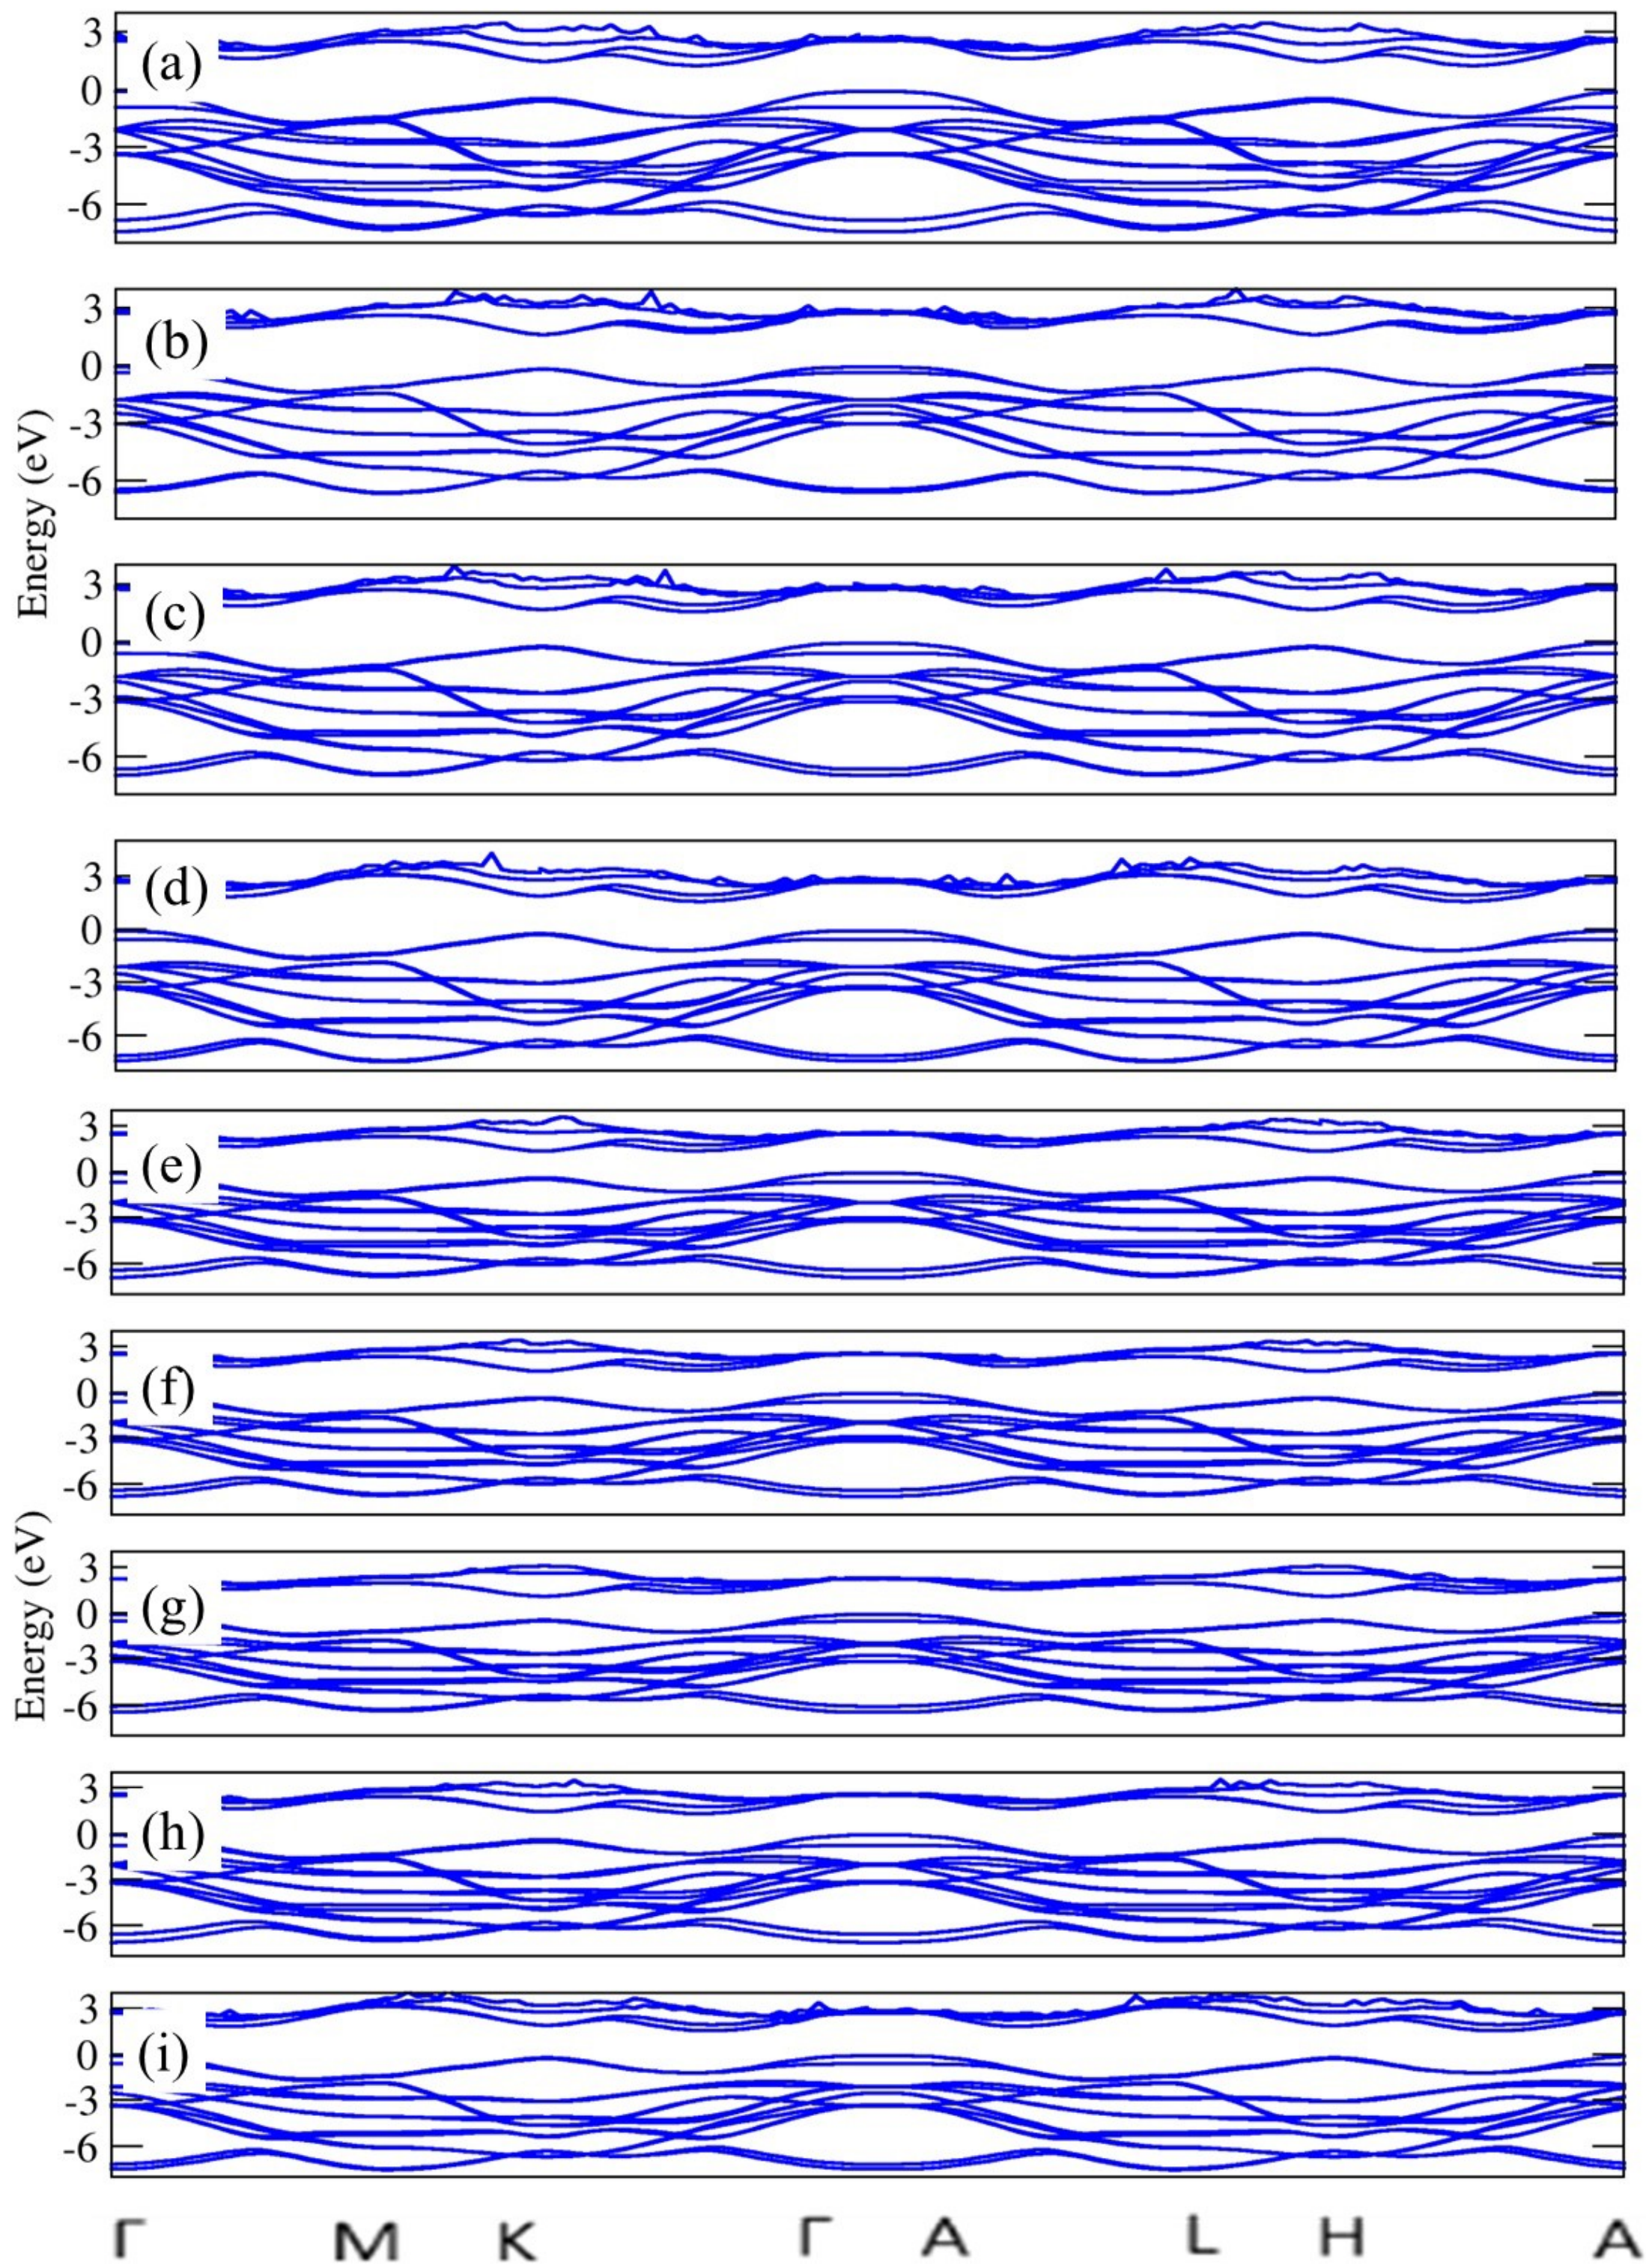

Supplement: d4nj03862b14.pdf [file d4nj03862b14.pdf]

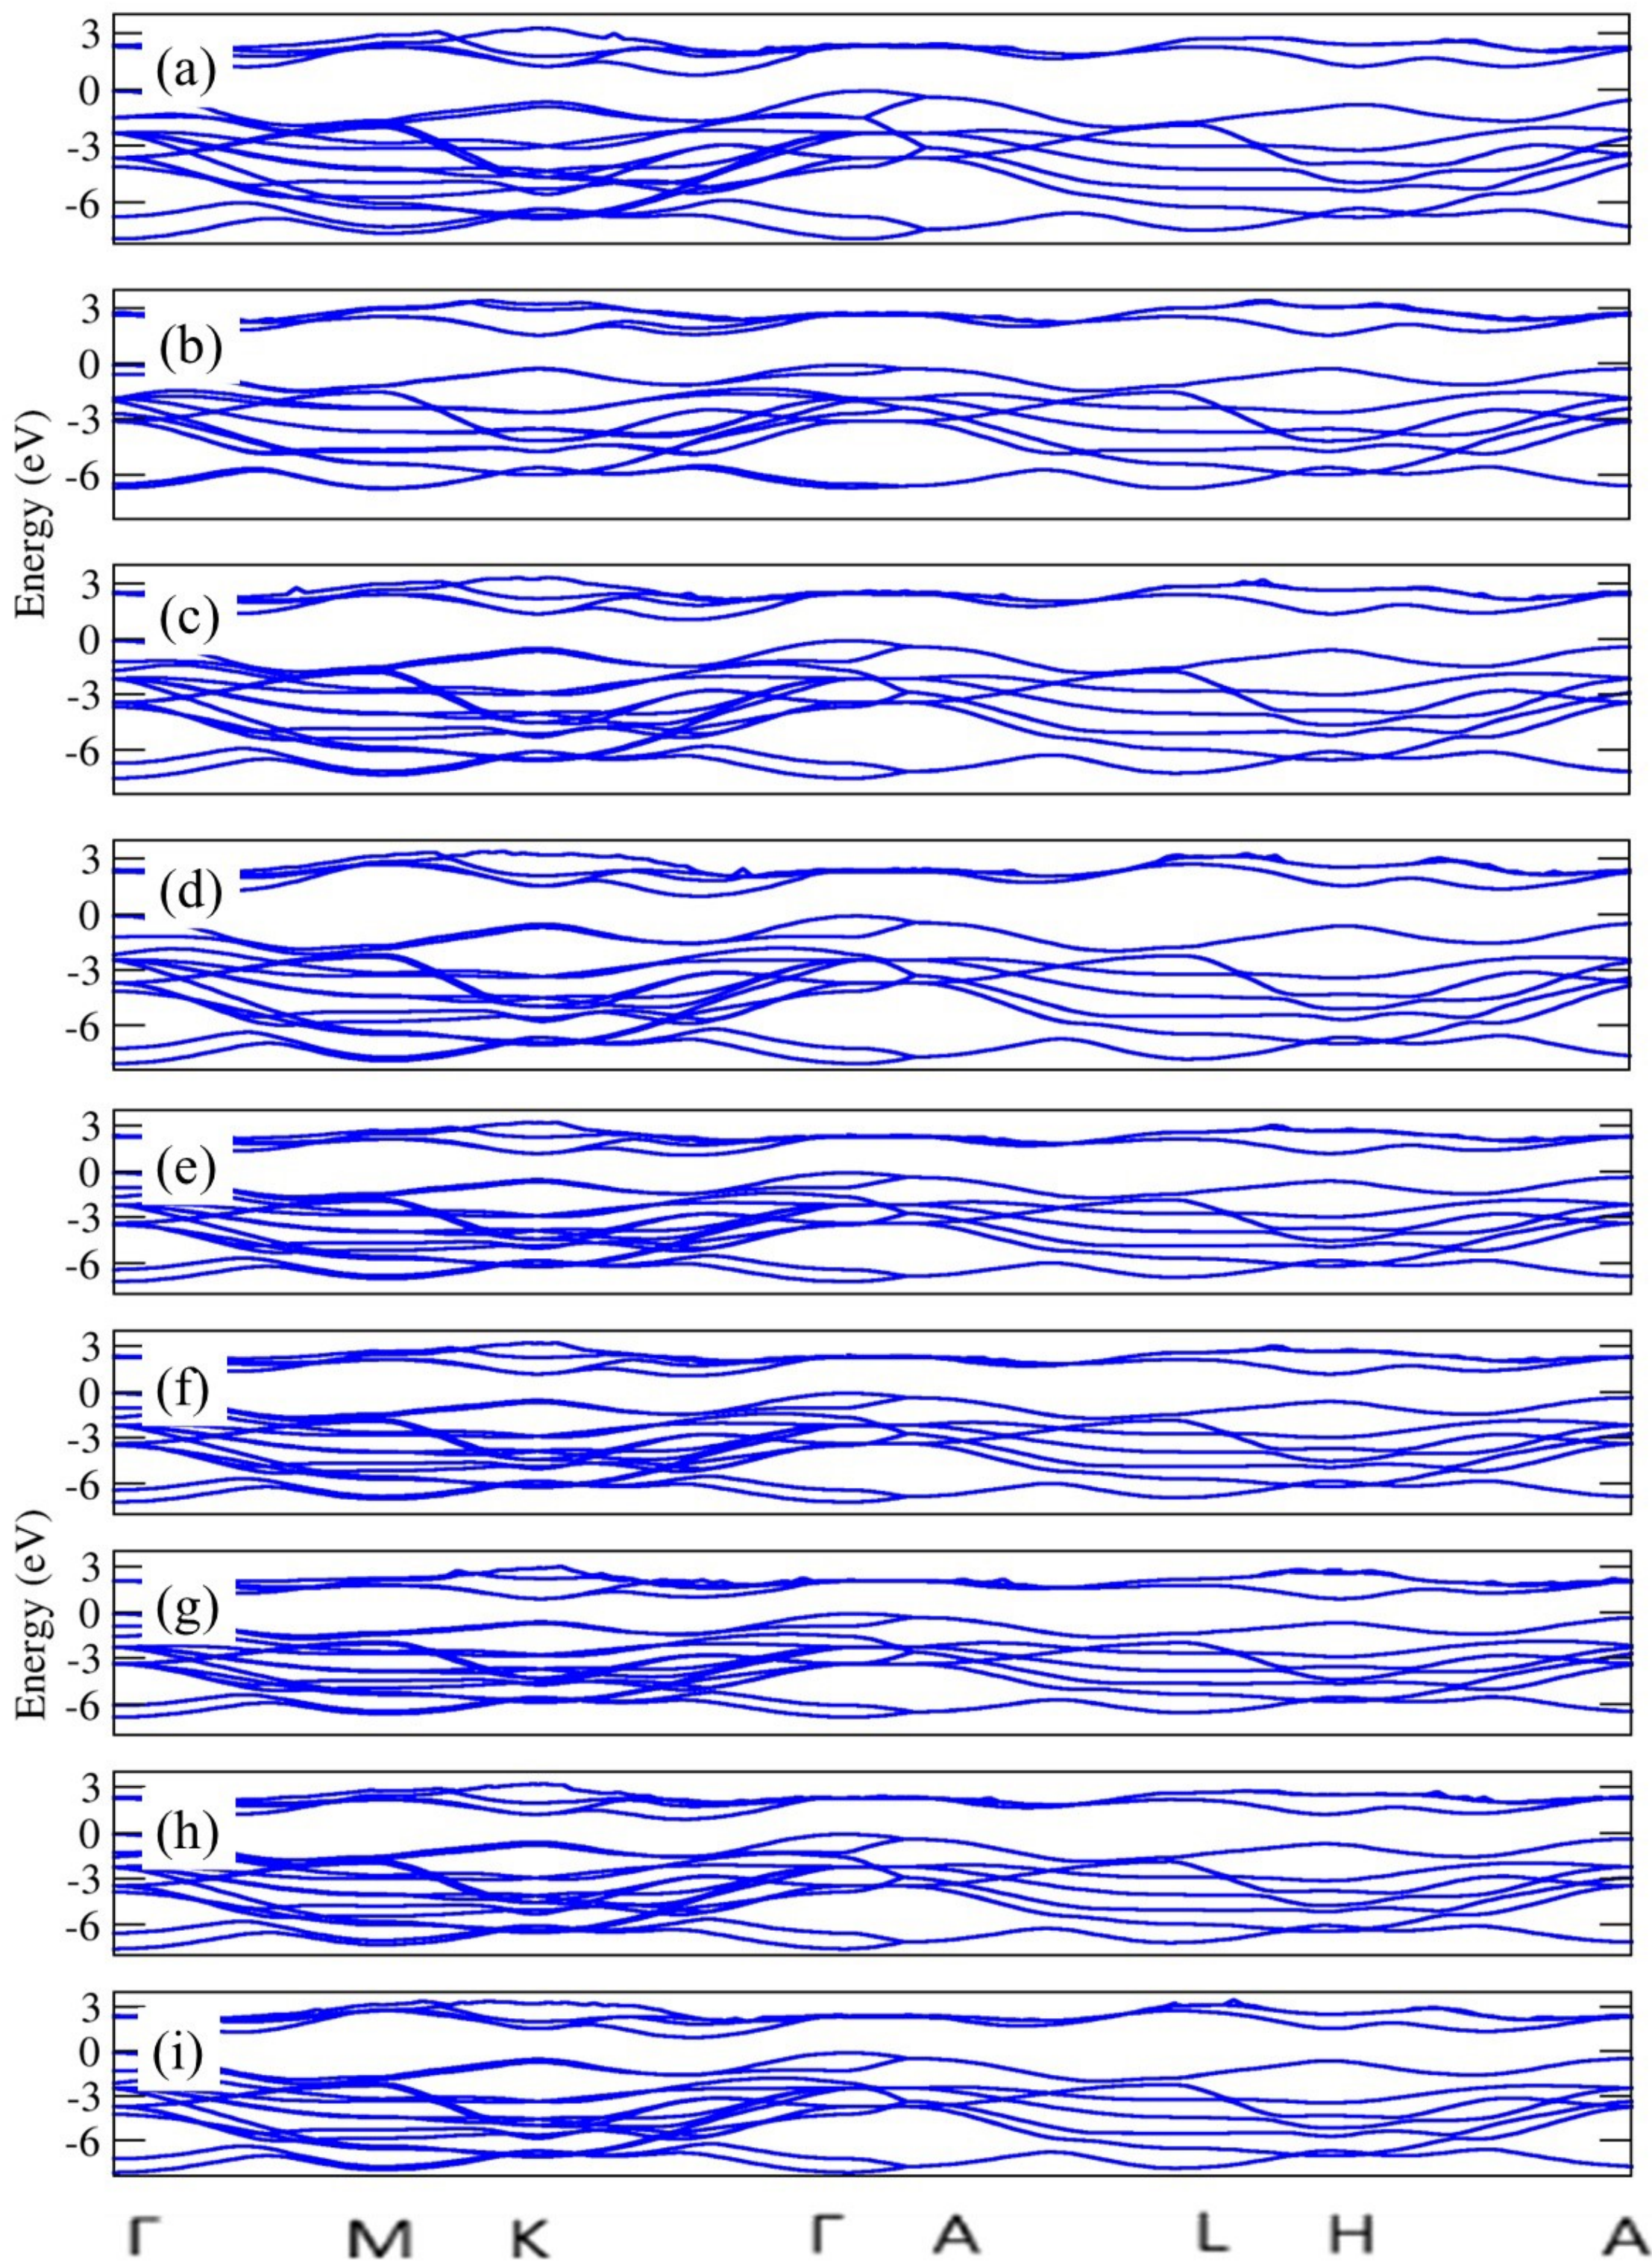

Supplement: d4nj03862b15.pdf [file d4nj03862b15.pdf]

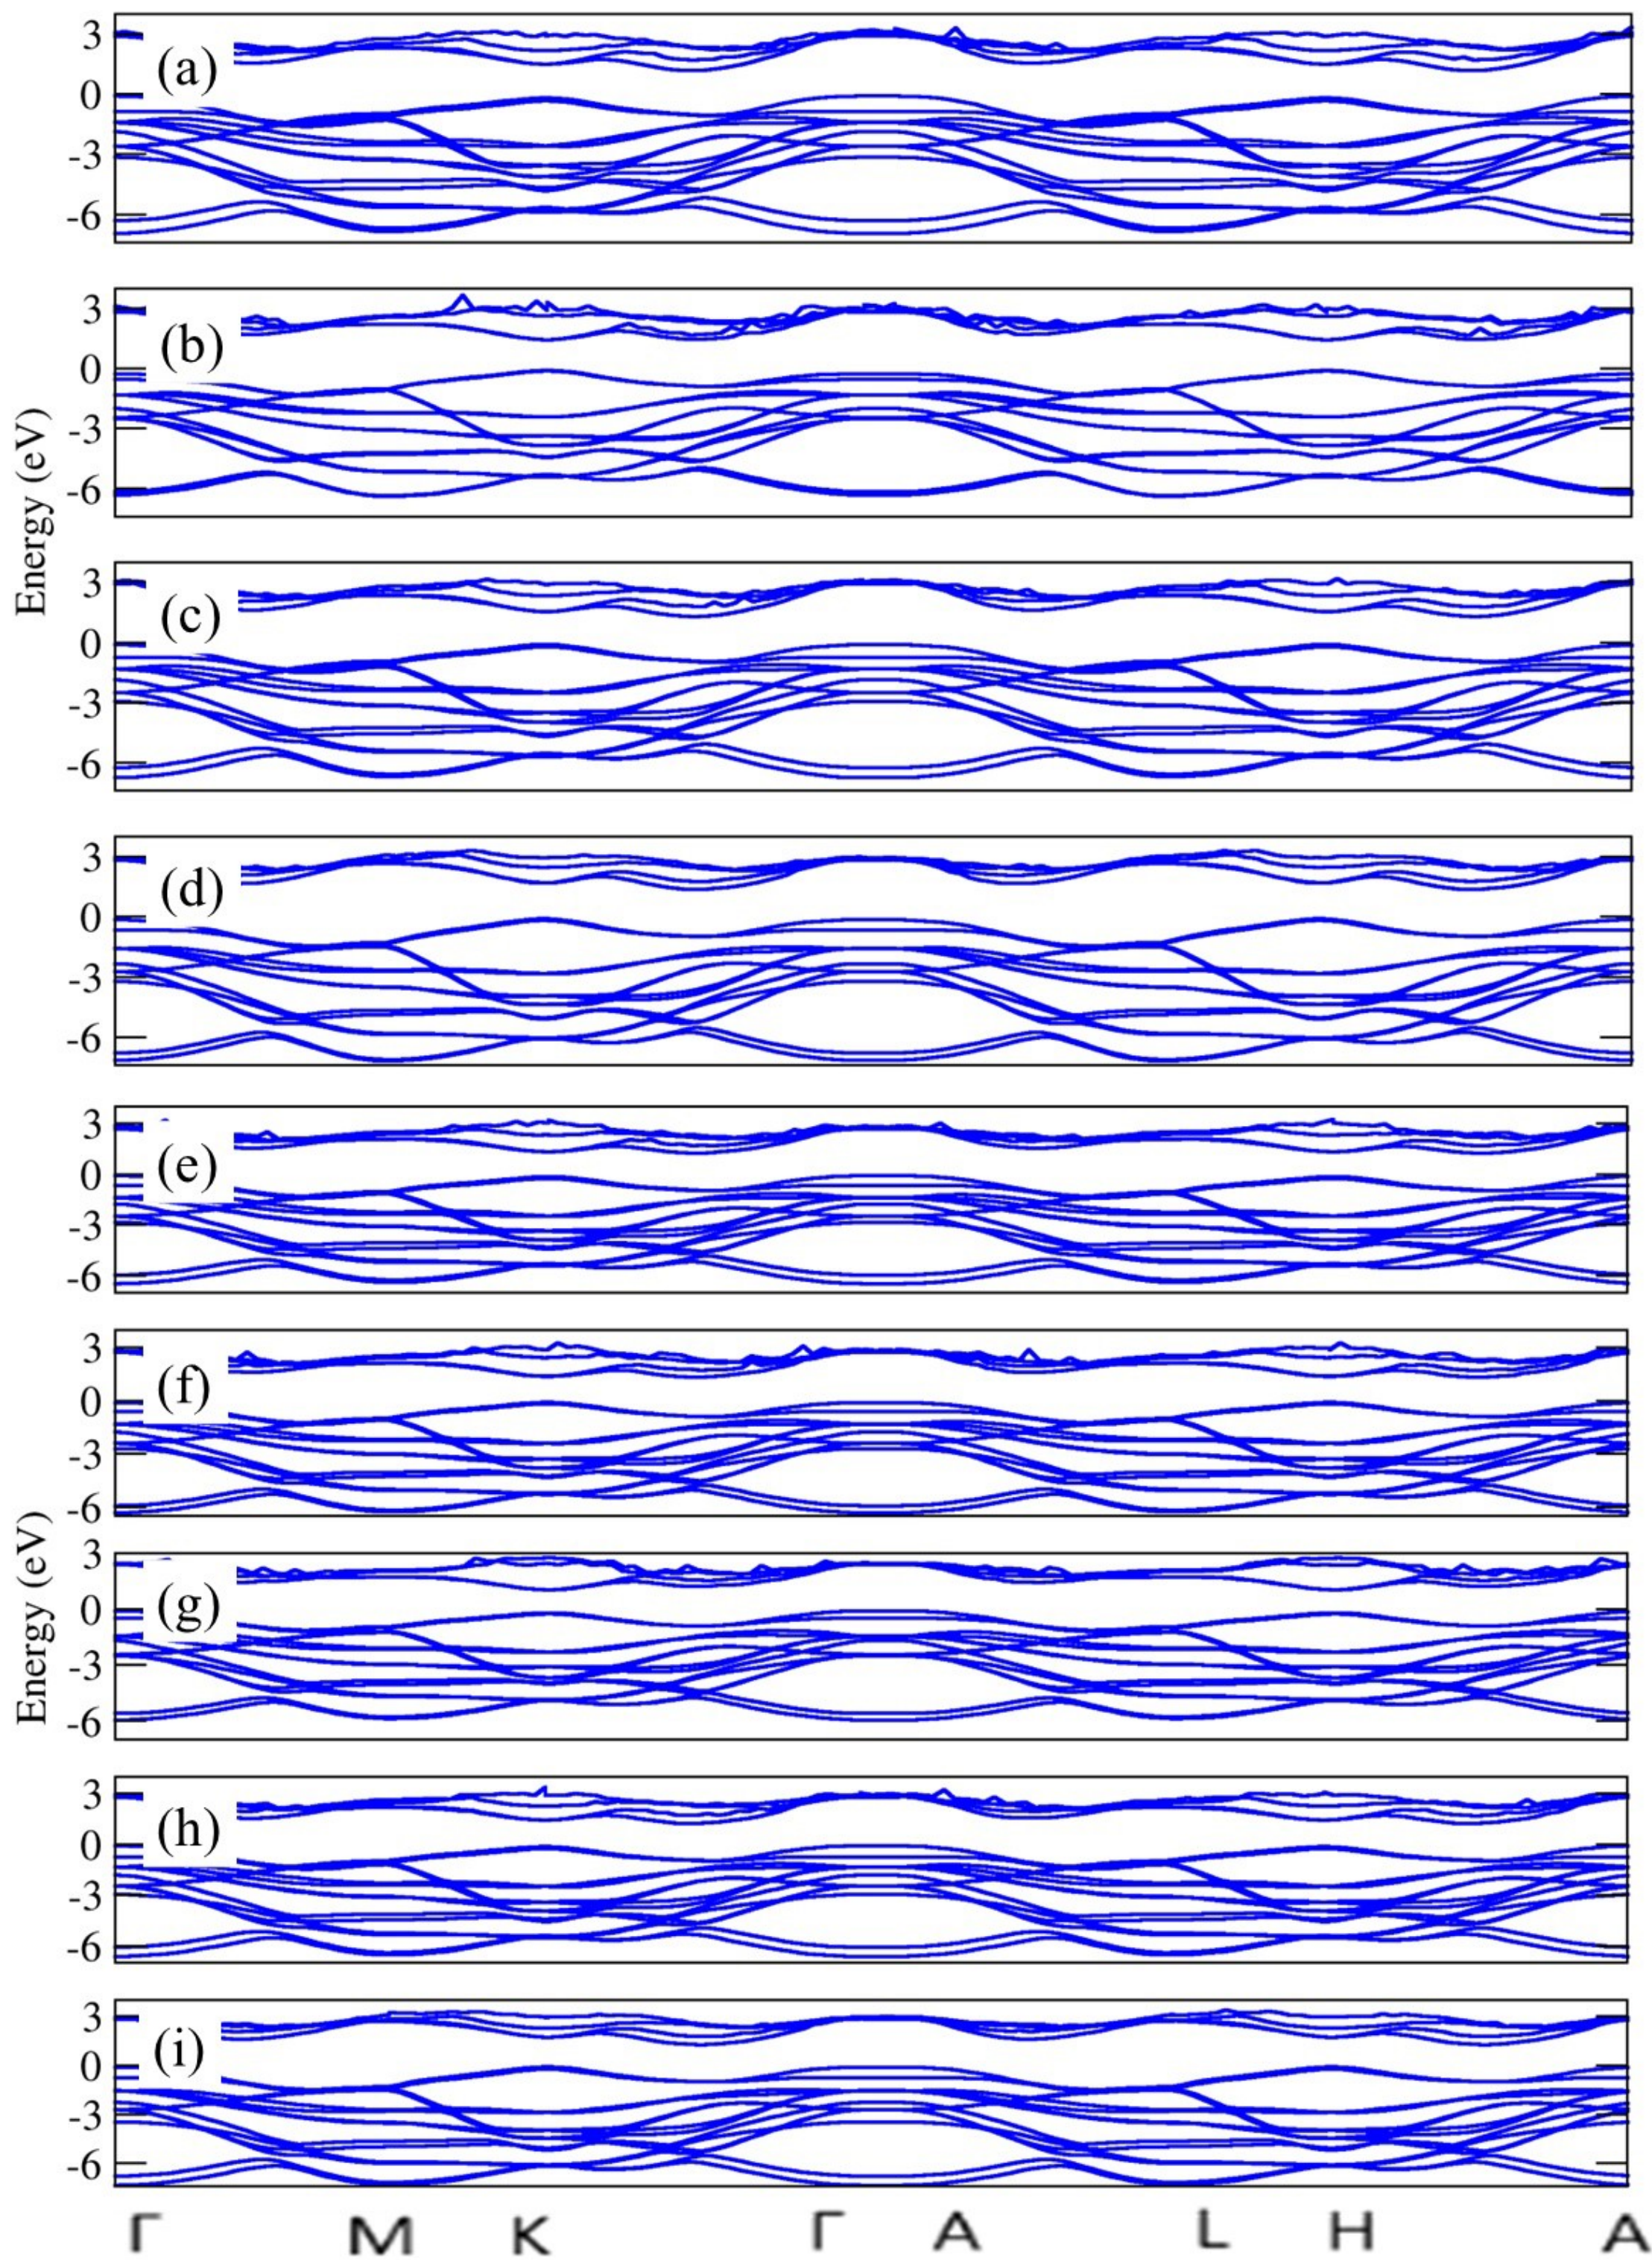

Supplement: d4nj03862b16.pdf [file d4nj03862b16.pdf]

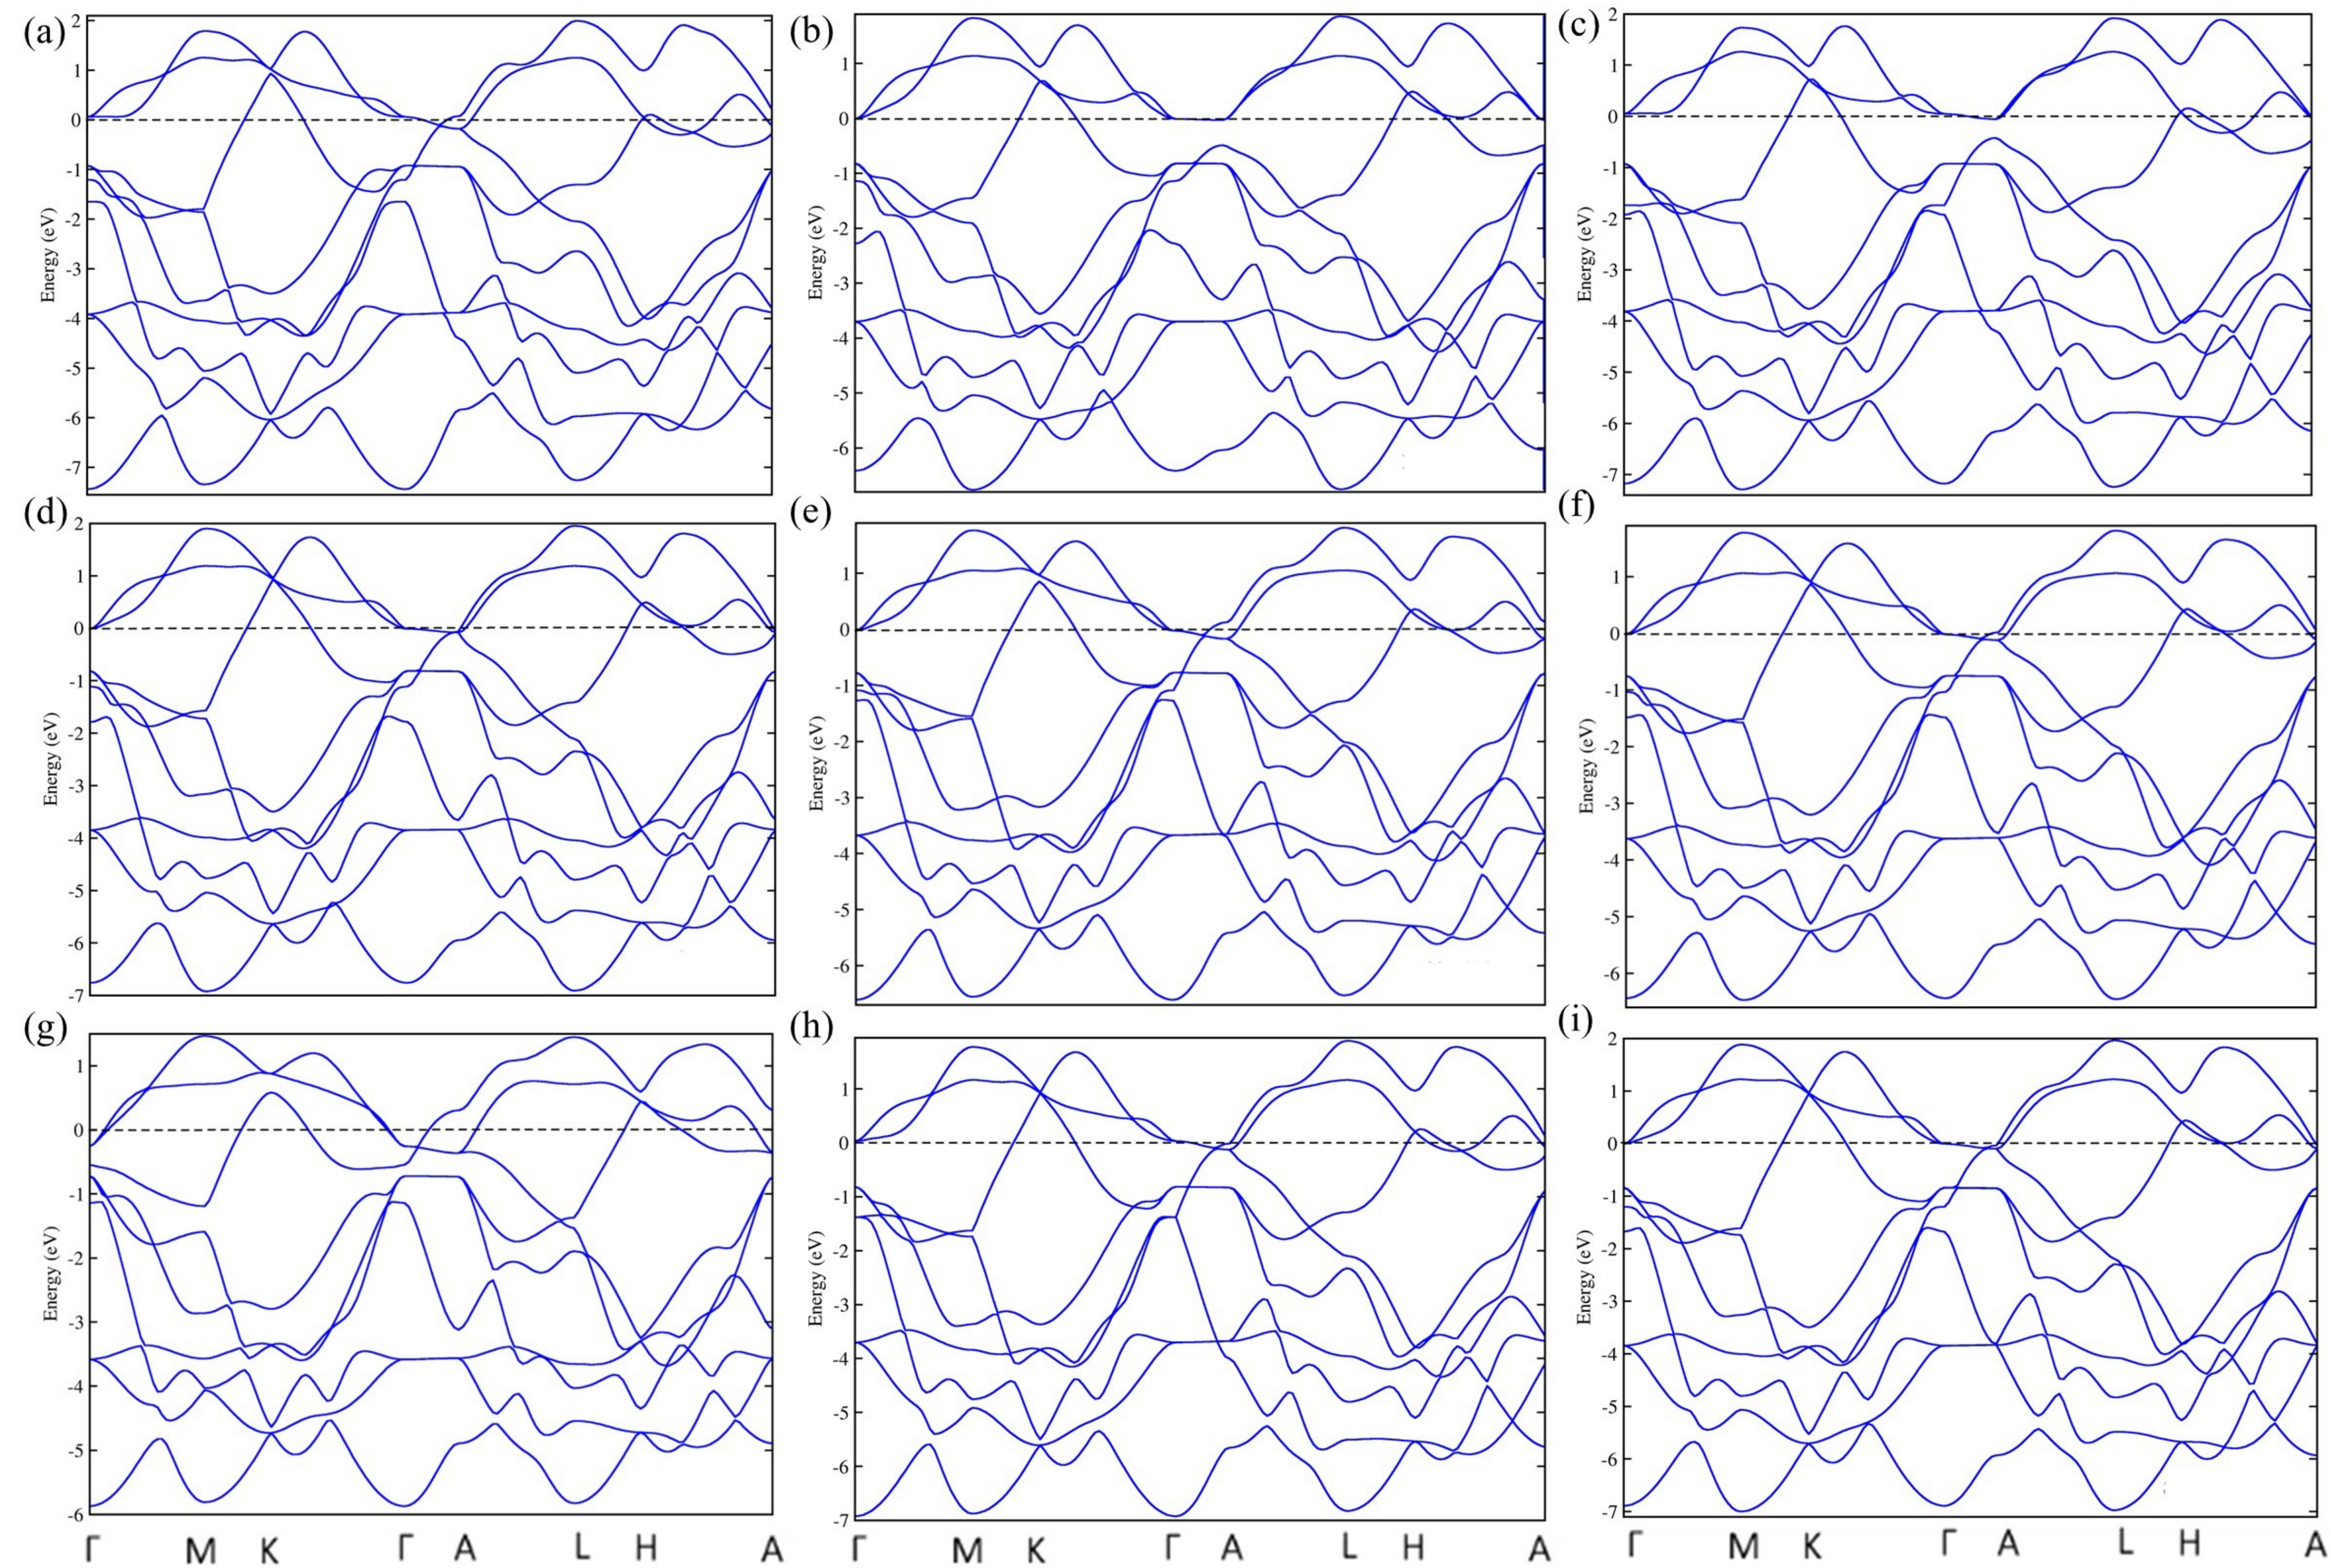

Supplement: d4nj03862b2.pdf [file d4nj03862b2.pdf]

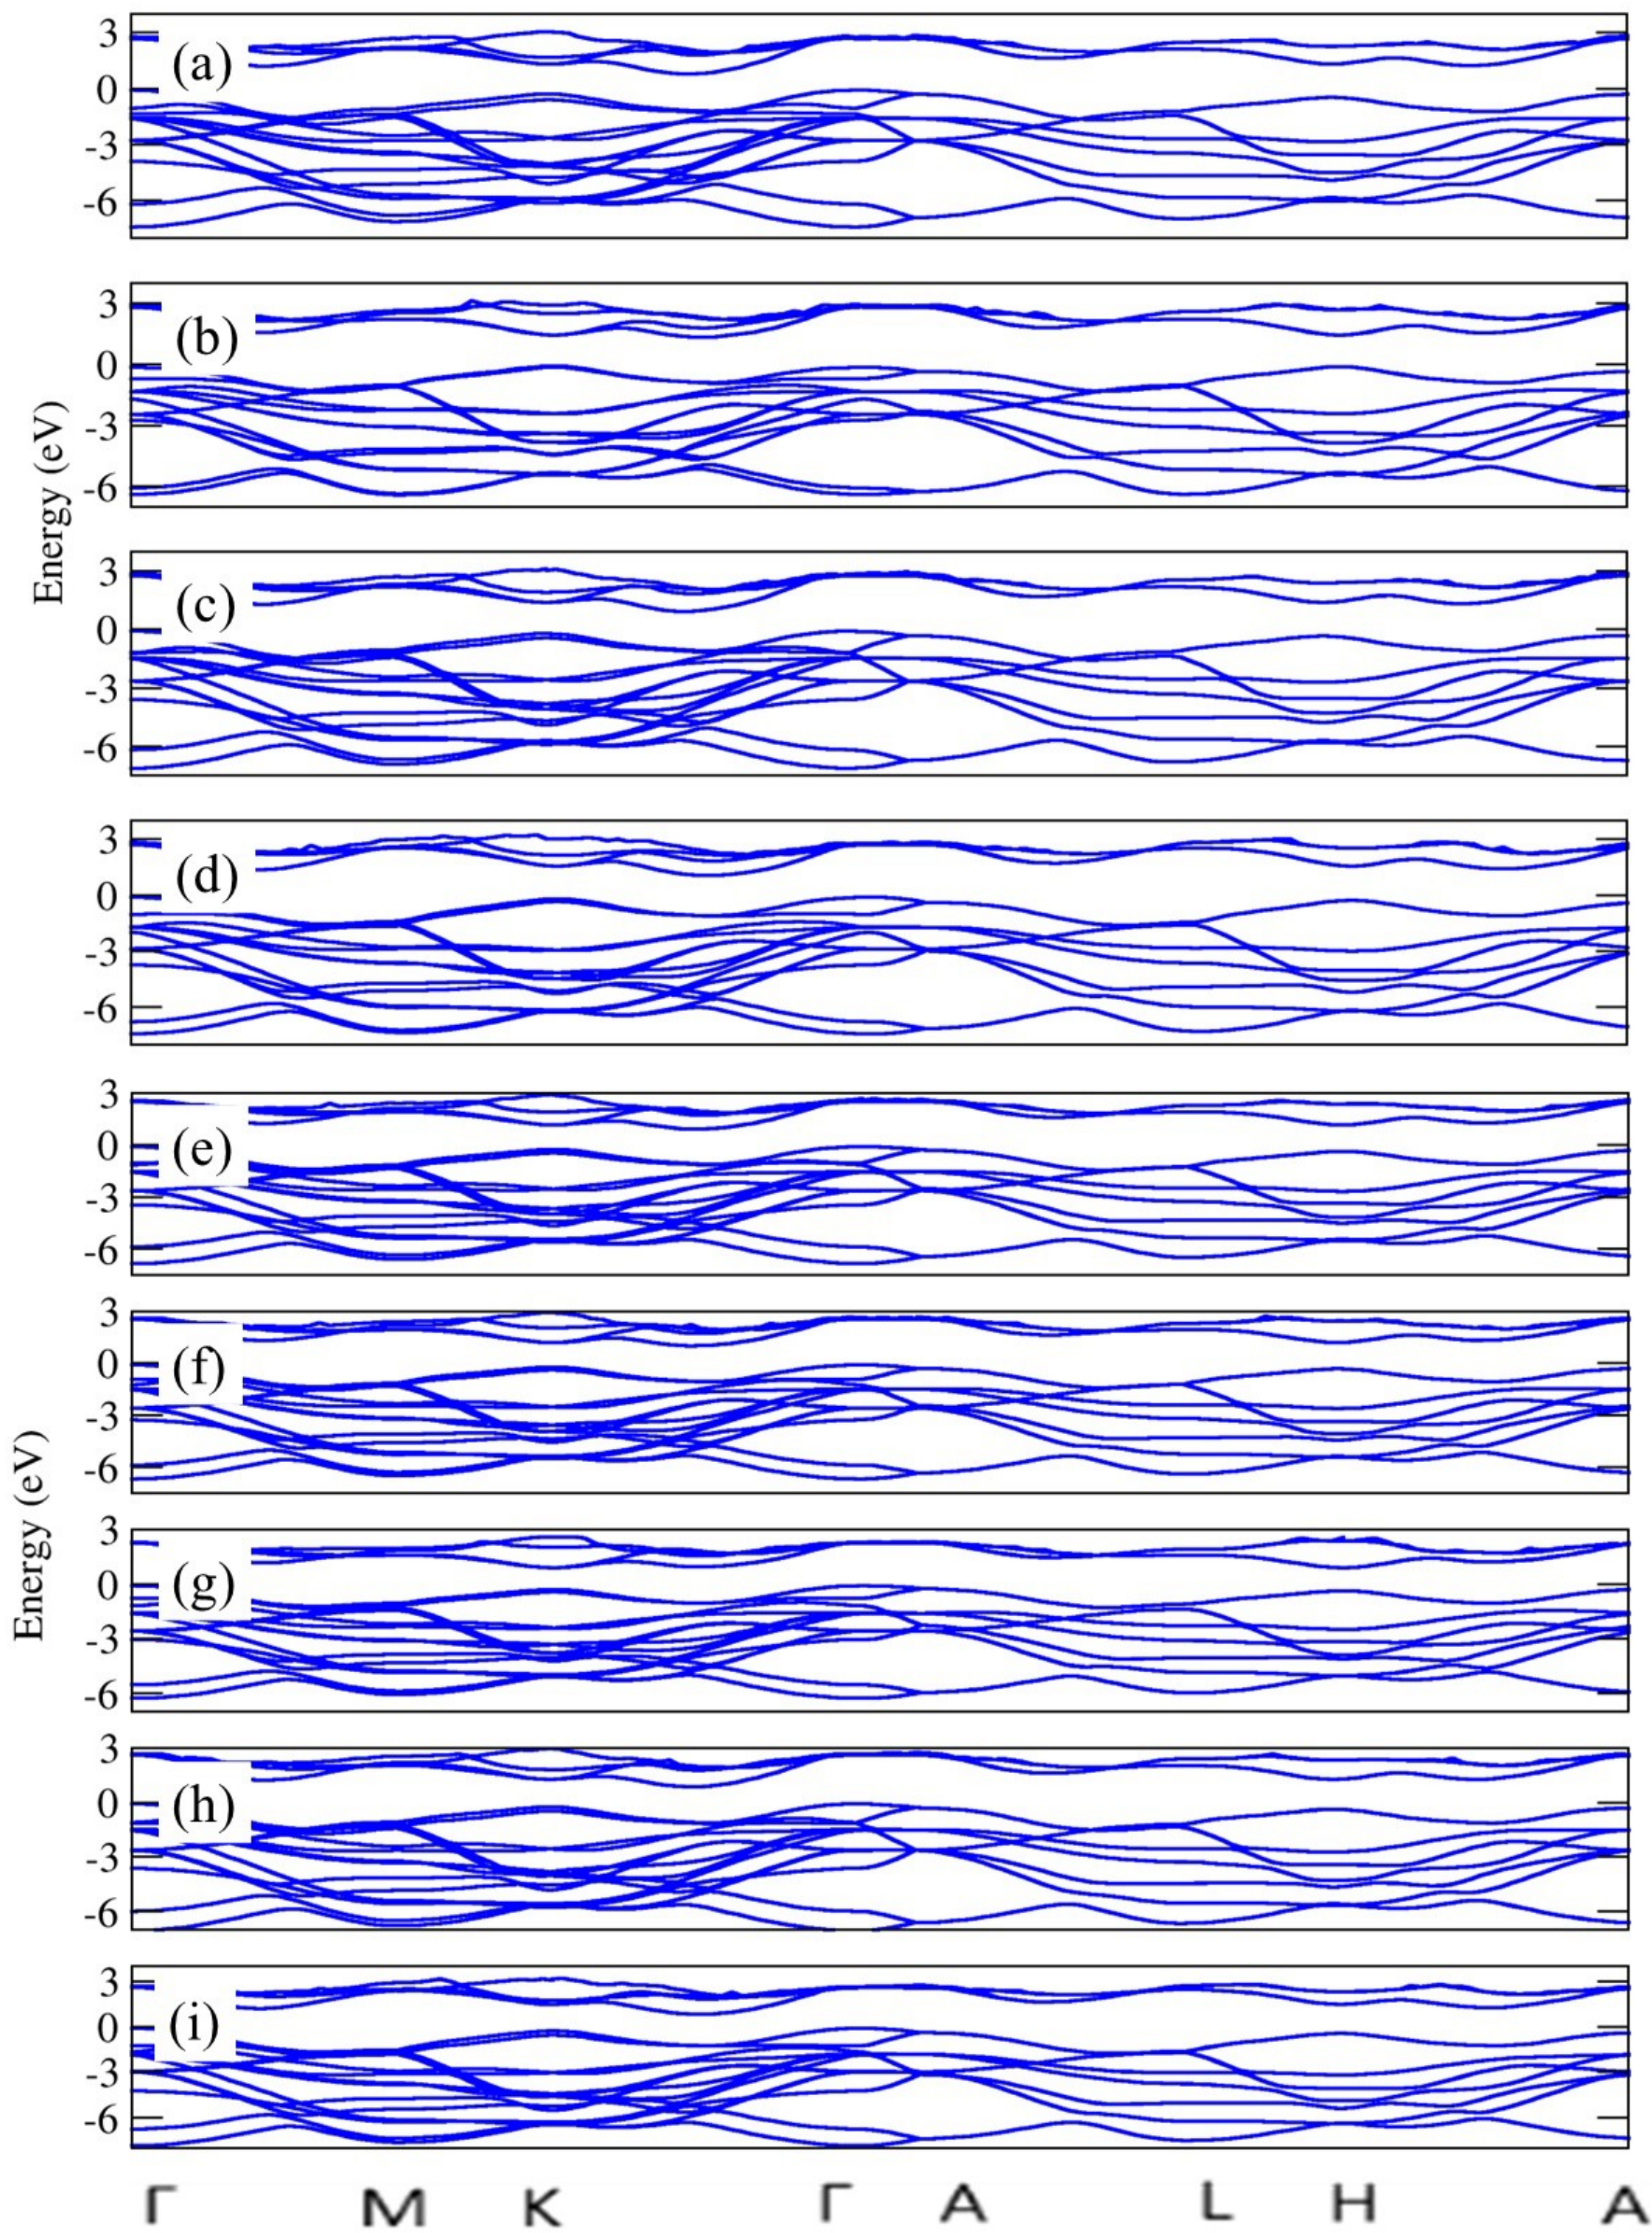

Supplement: d4nj03862b3.pdf [file d4nj03862b3.pdf]

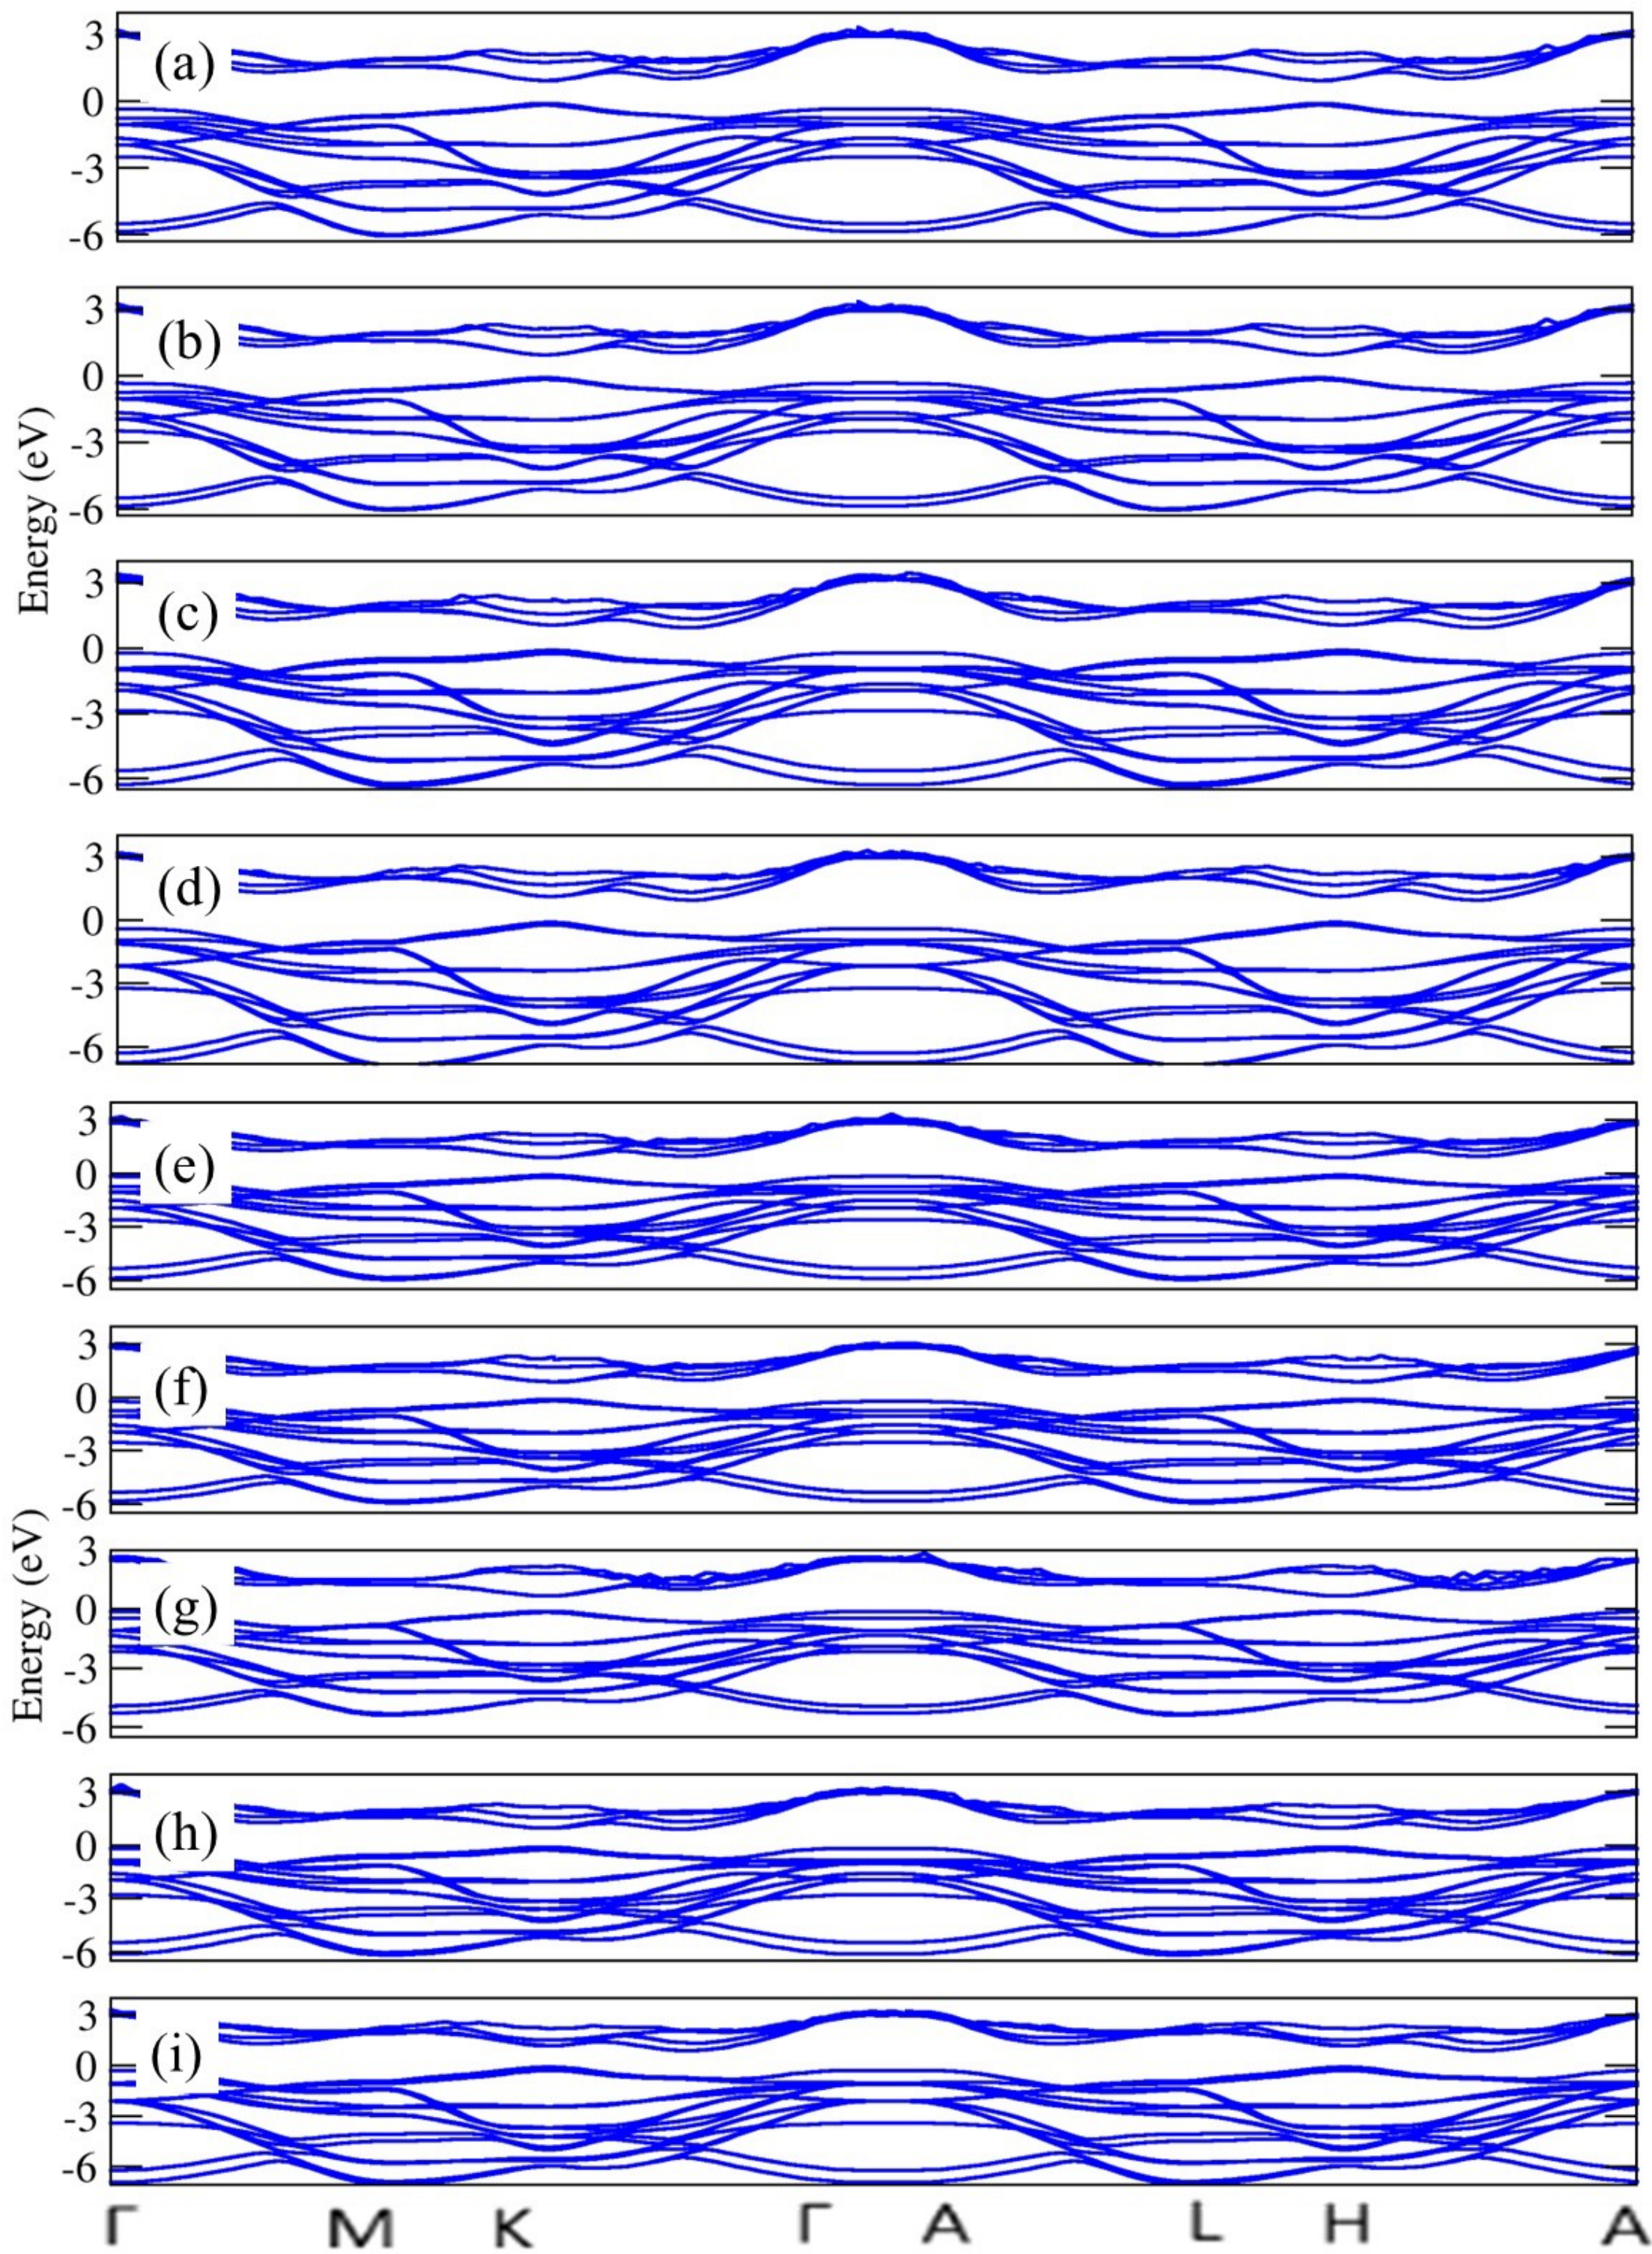

Supplement: d4nj03862b4.pdf [file d4nj03862b4.pdf]

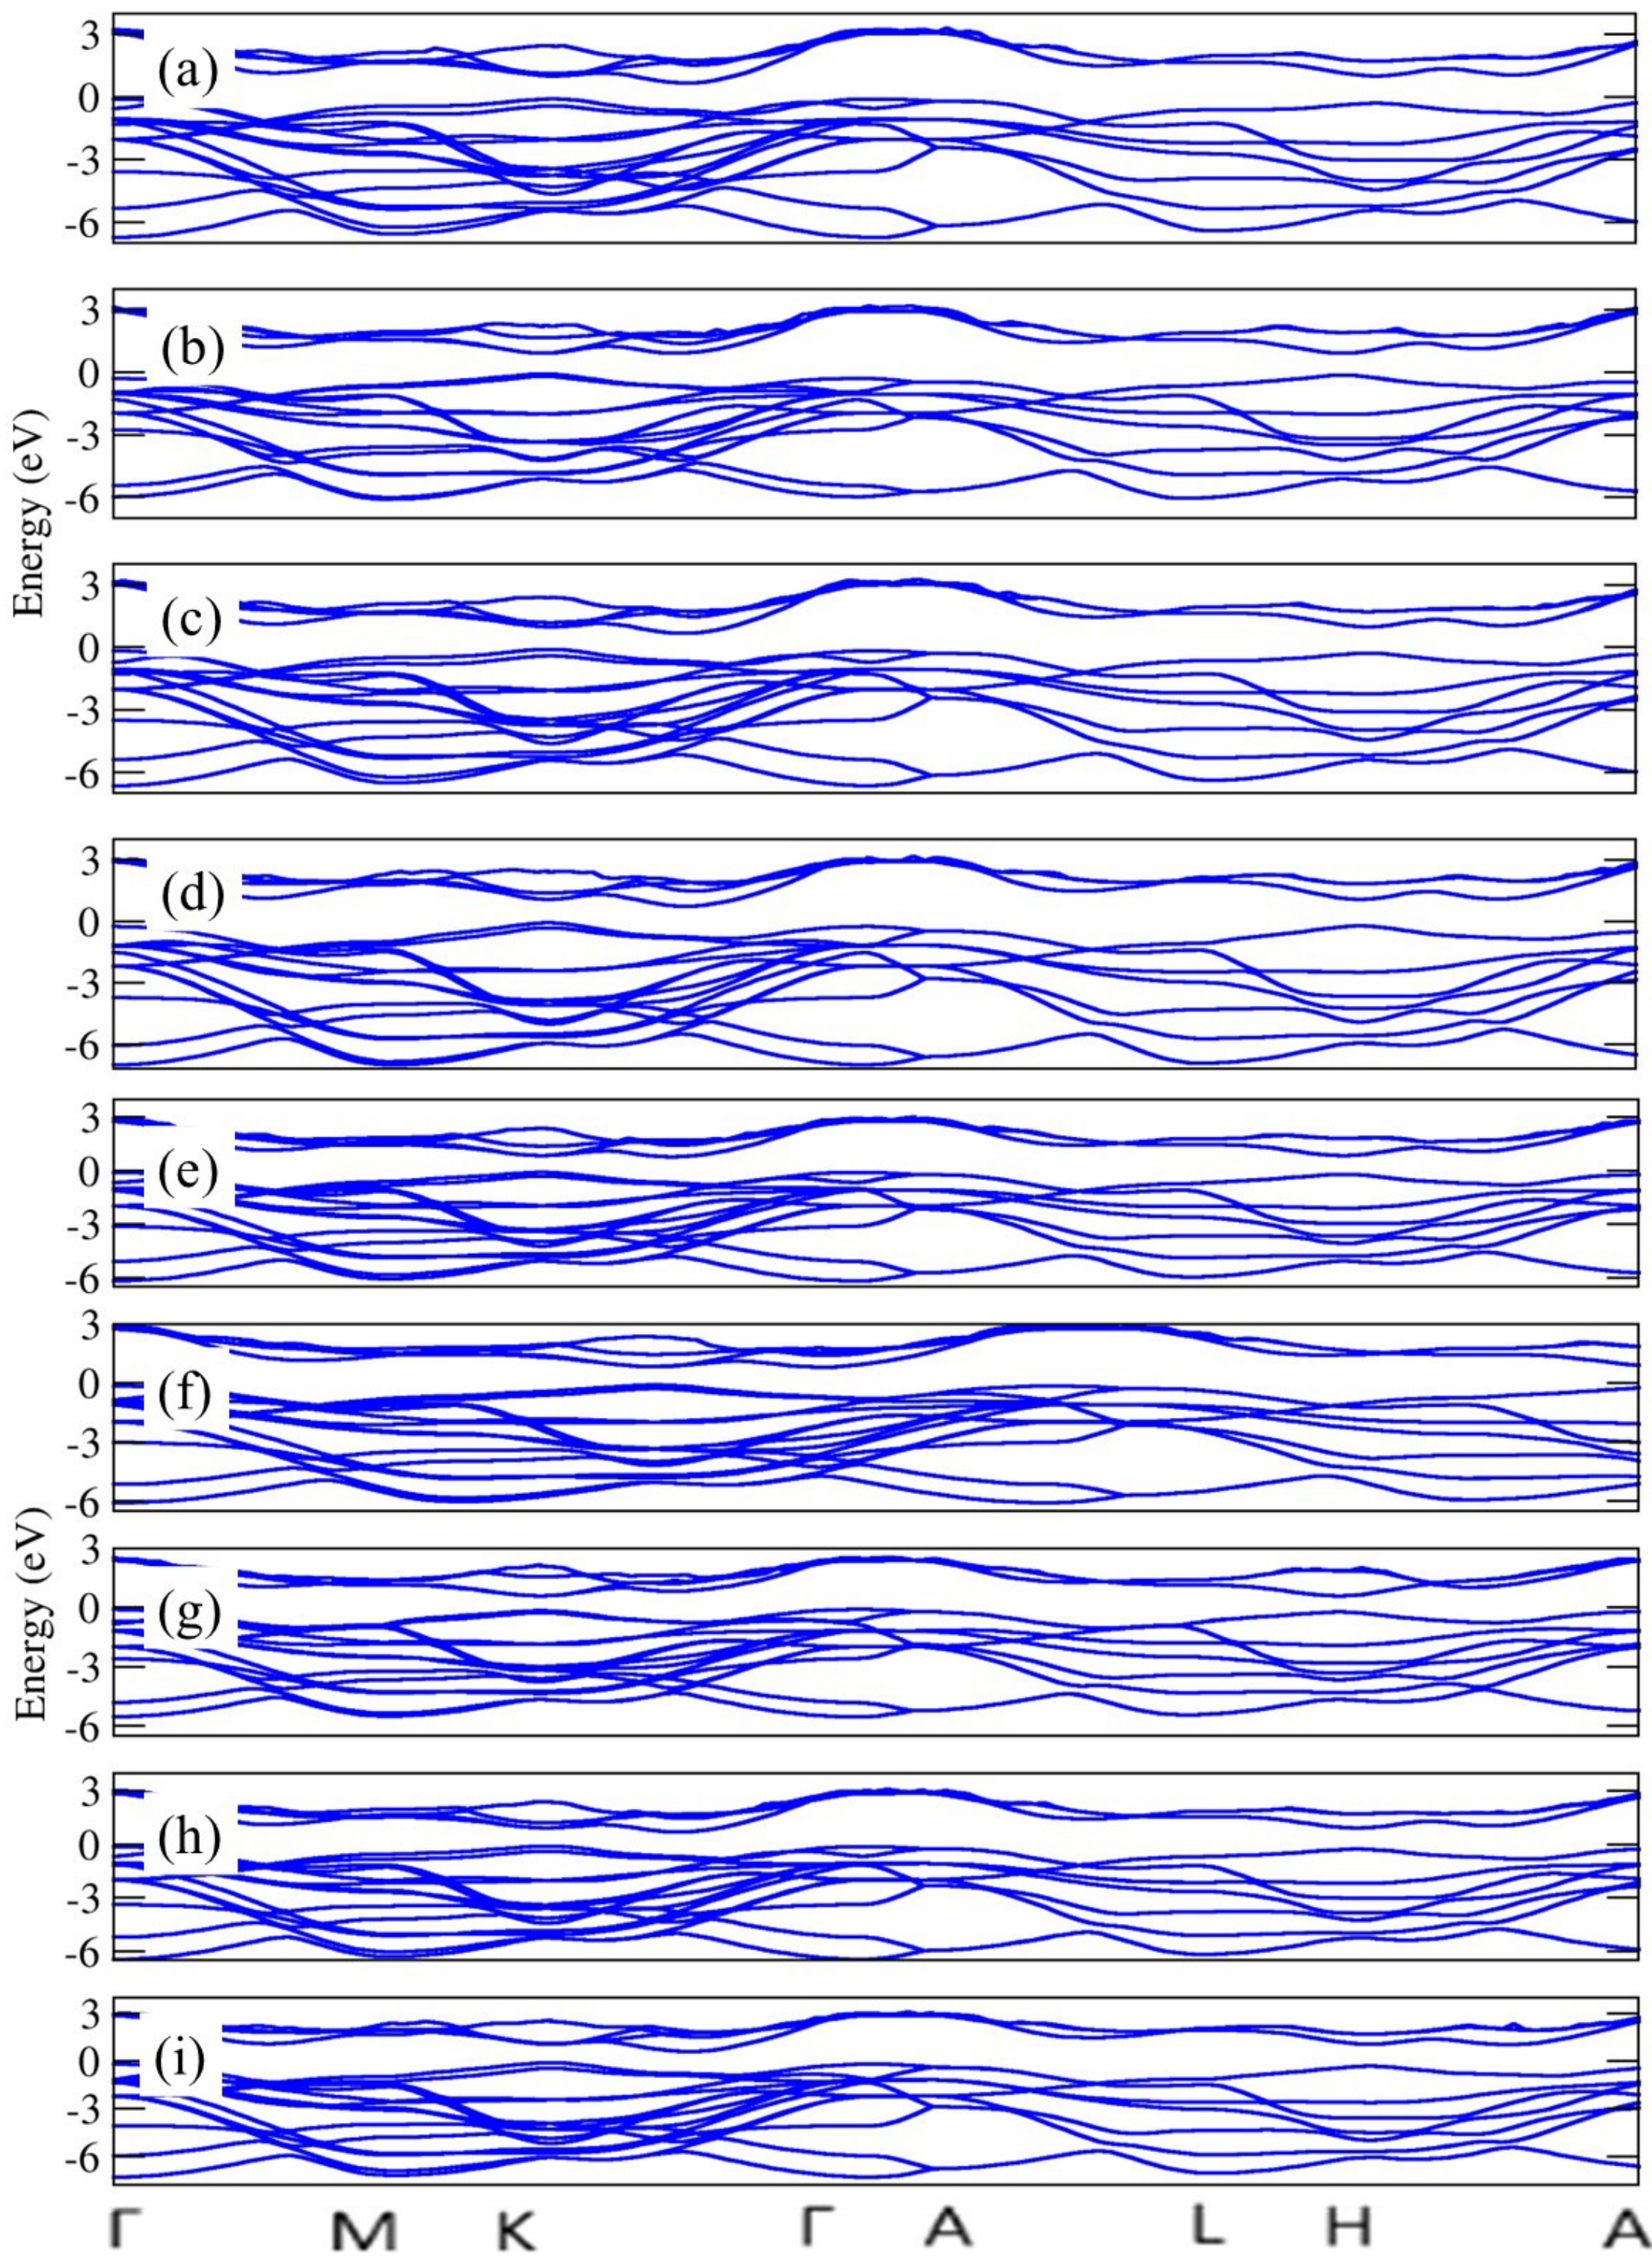

Supplement: d4nj03862b5.pdf [file d4nj03862b5.pdf]

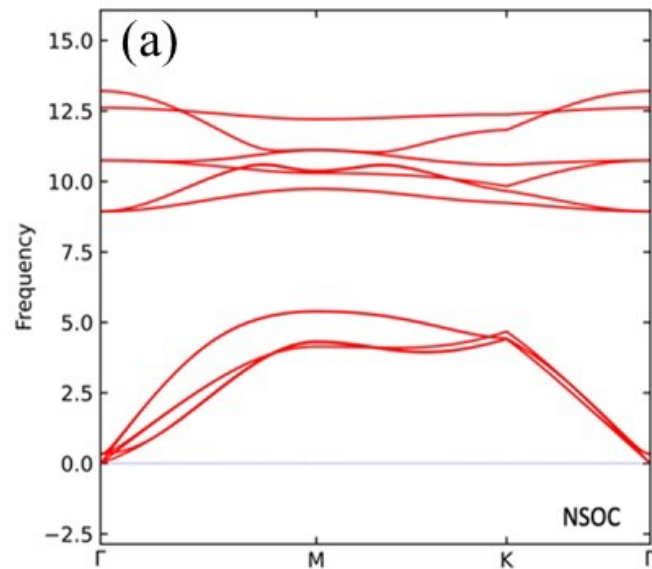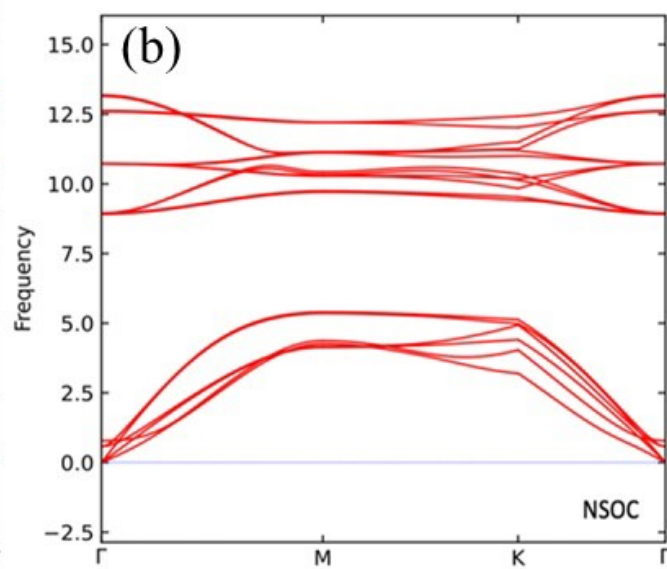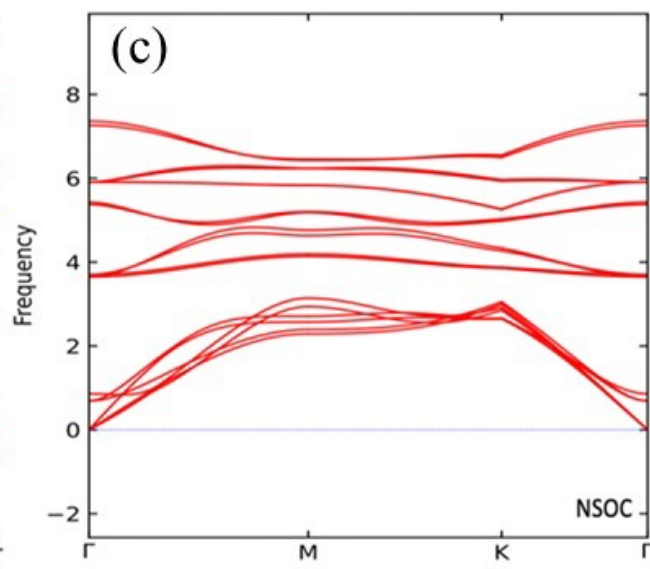

Supplement: d4nj03862b6.pdf [file d4nj03862b6.pdf]

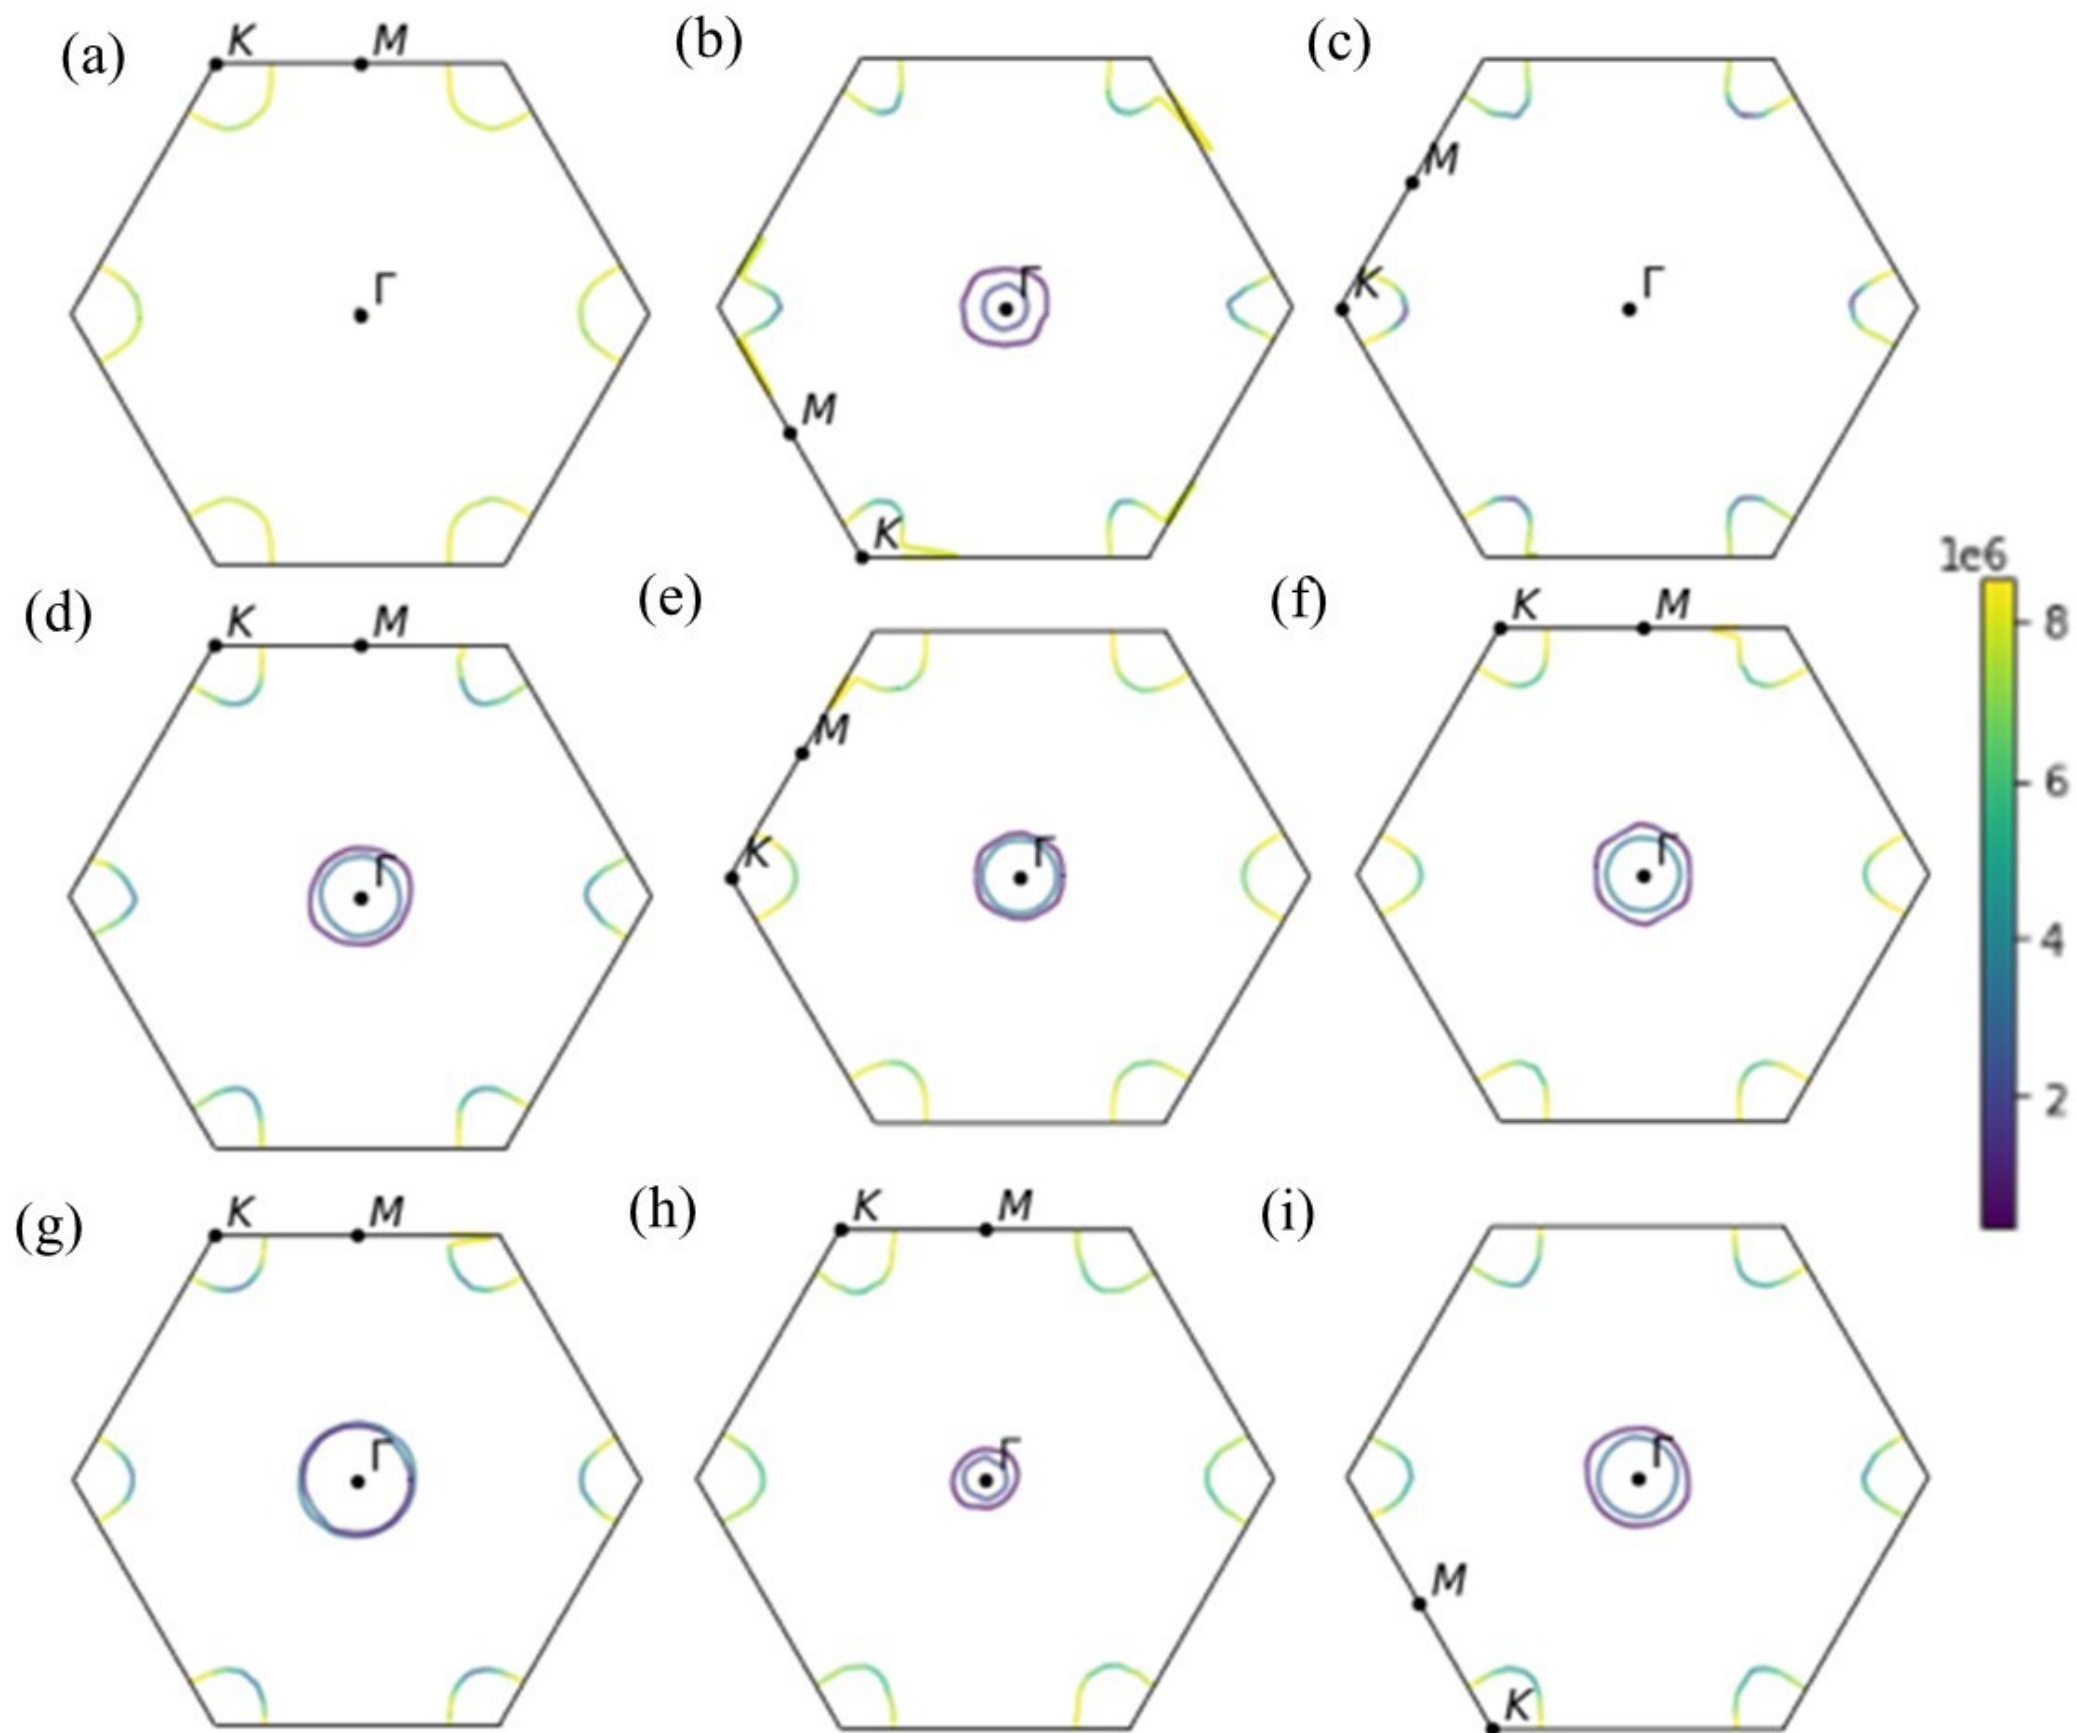

Supplement: d4nj03862b7.pdf [file d4nj03862b7.pdf]

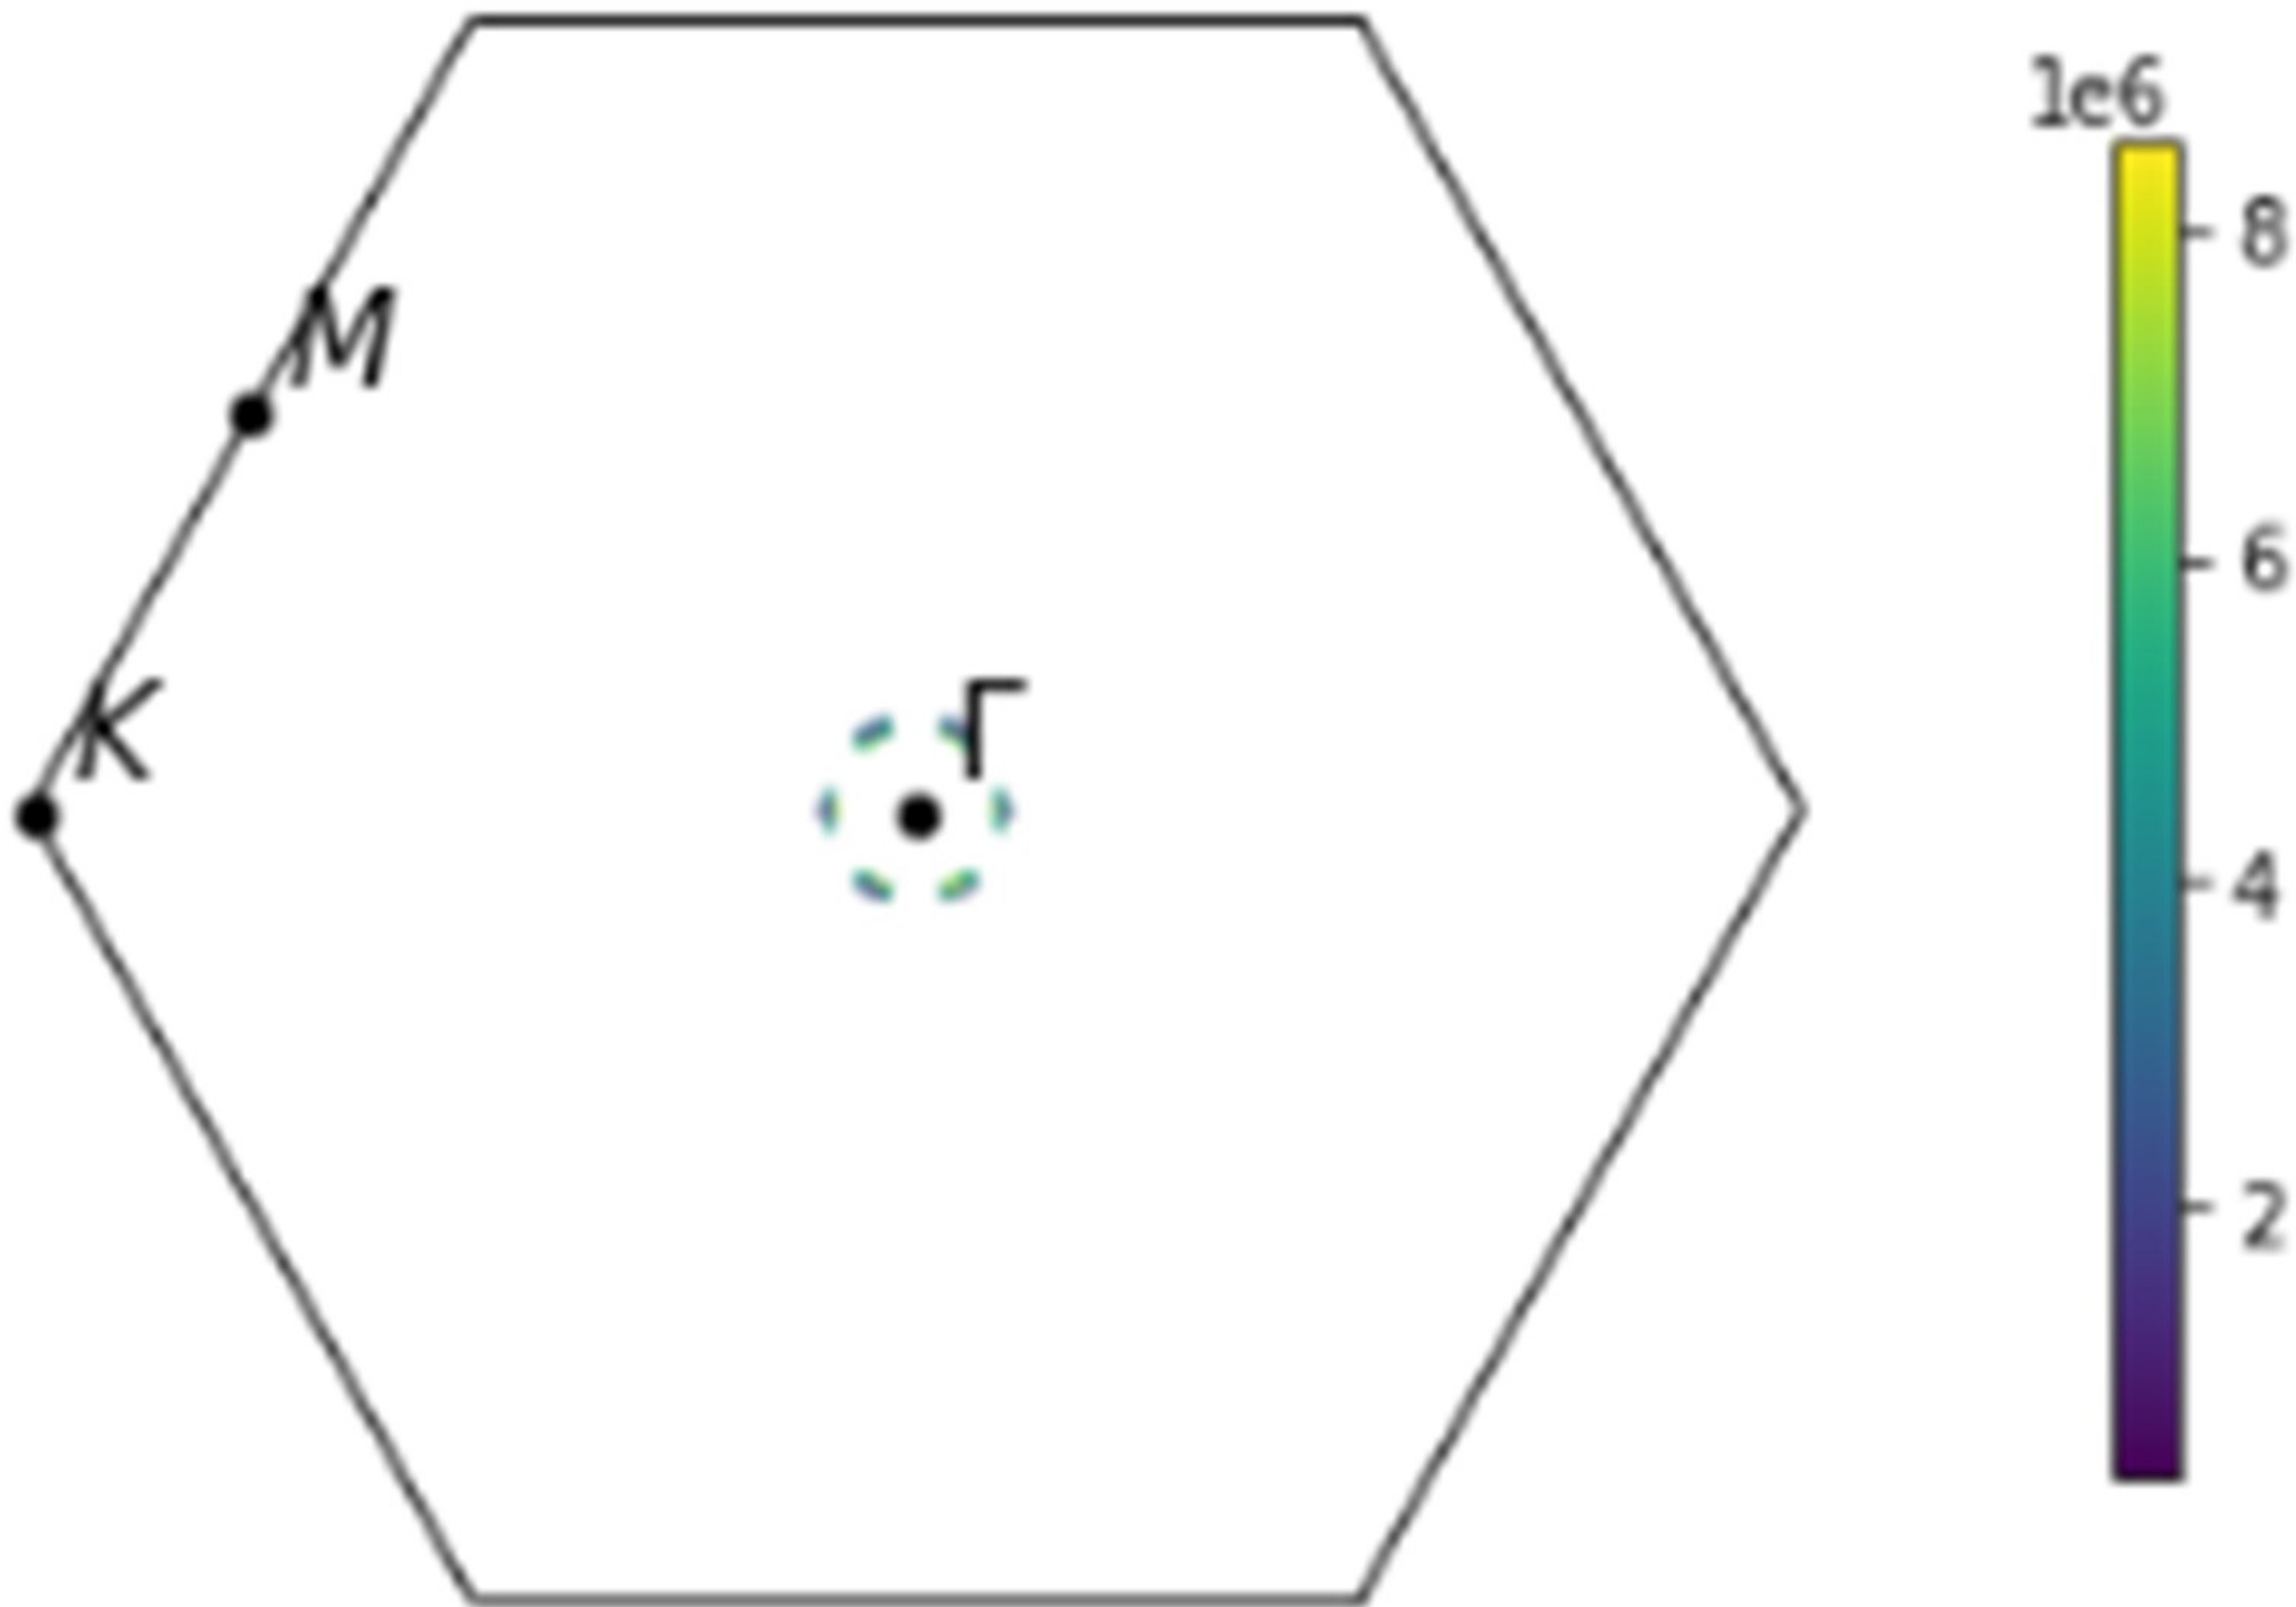

Supplement: d4nj03862b8.pdf [file d4nj03862b8.pdf]

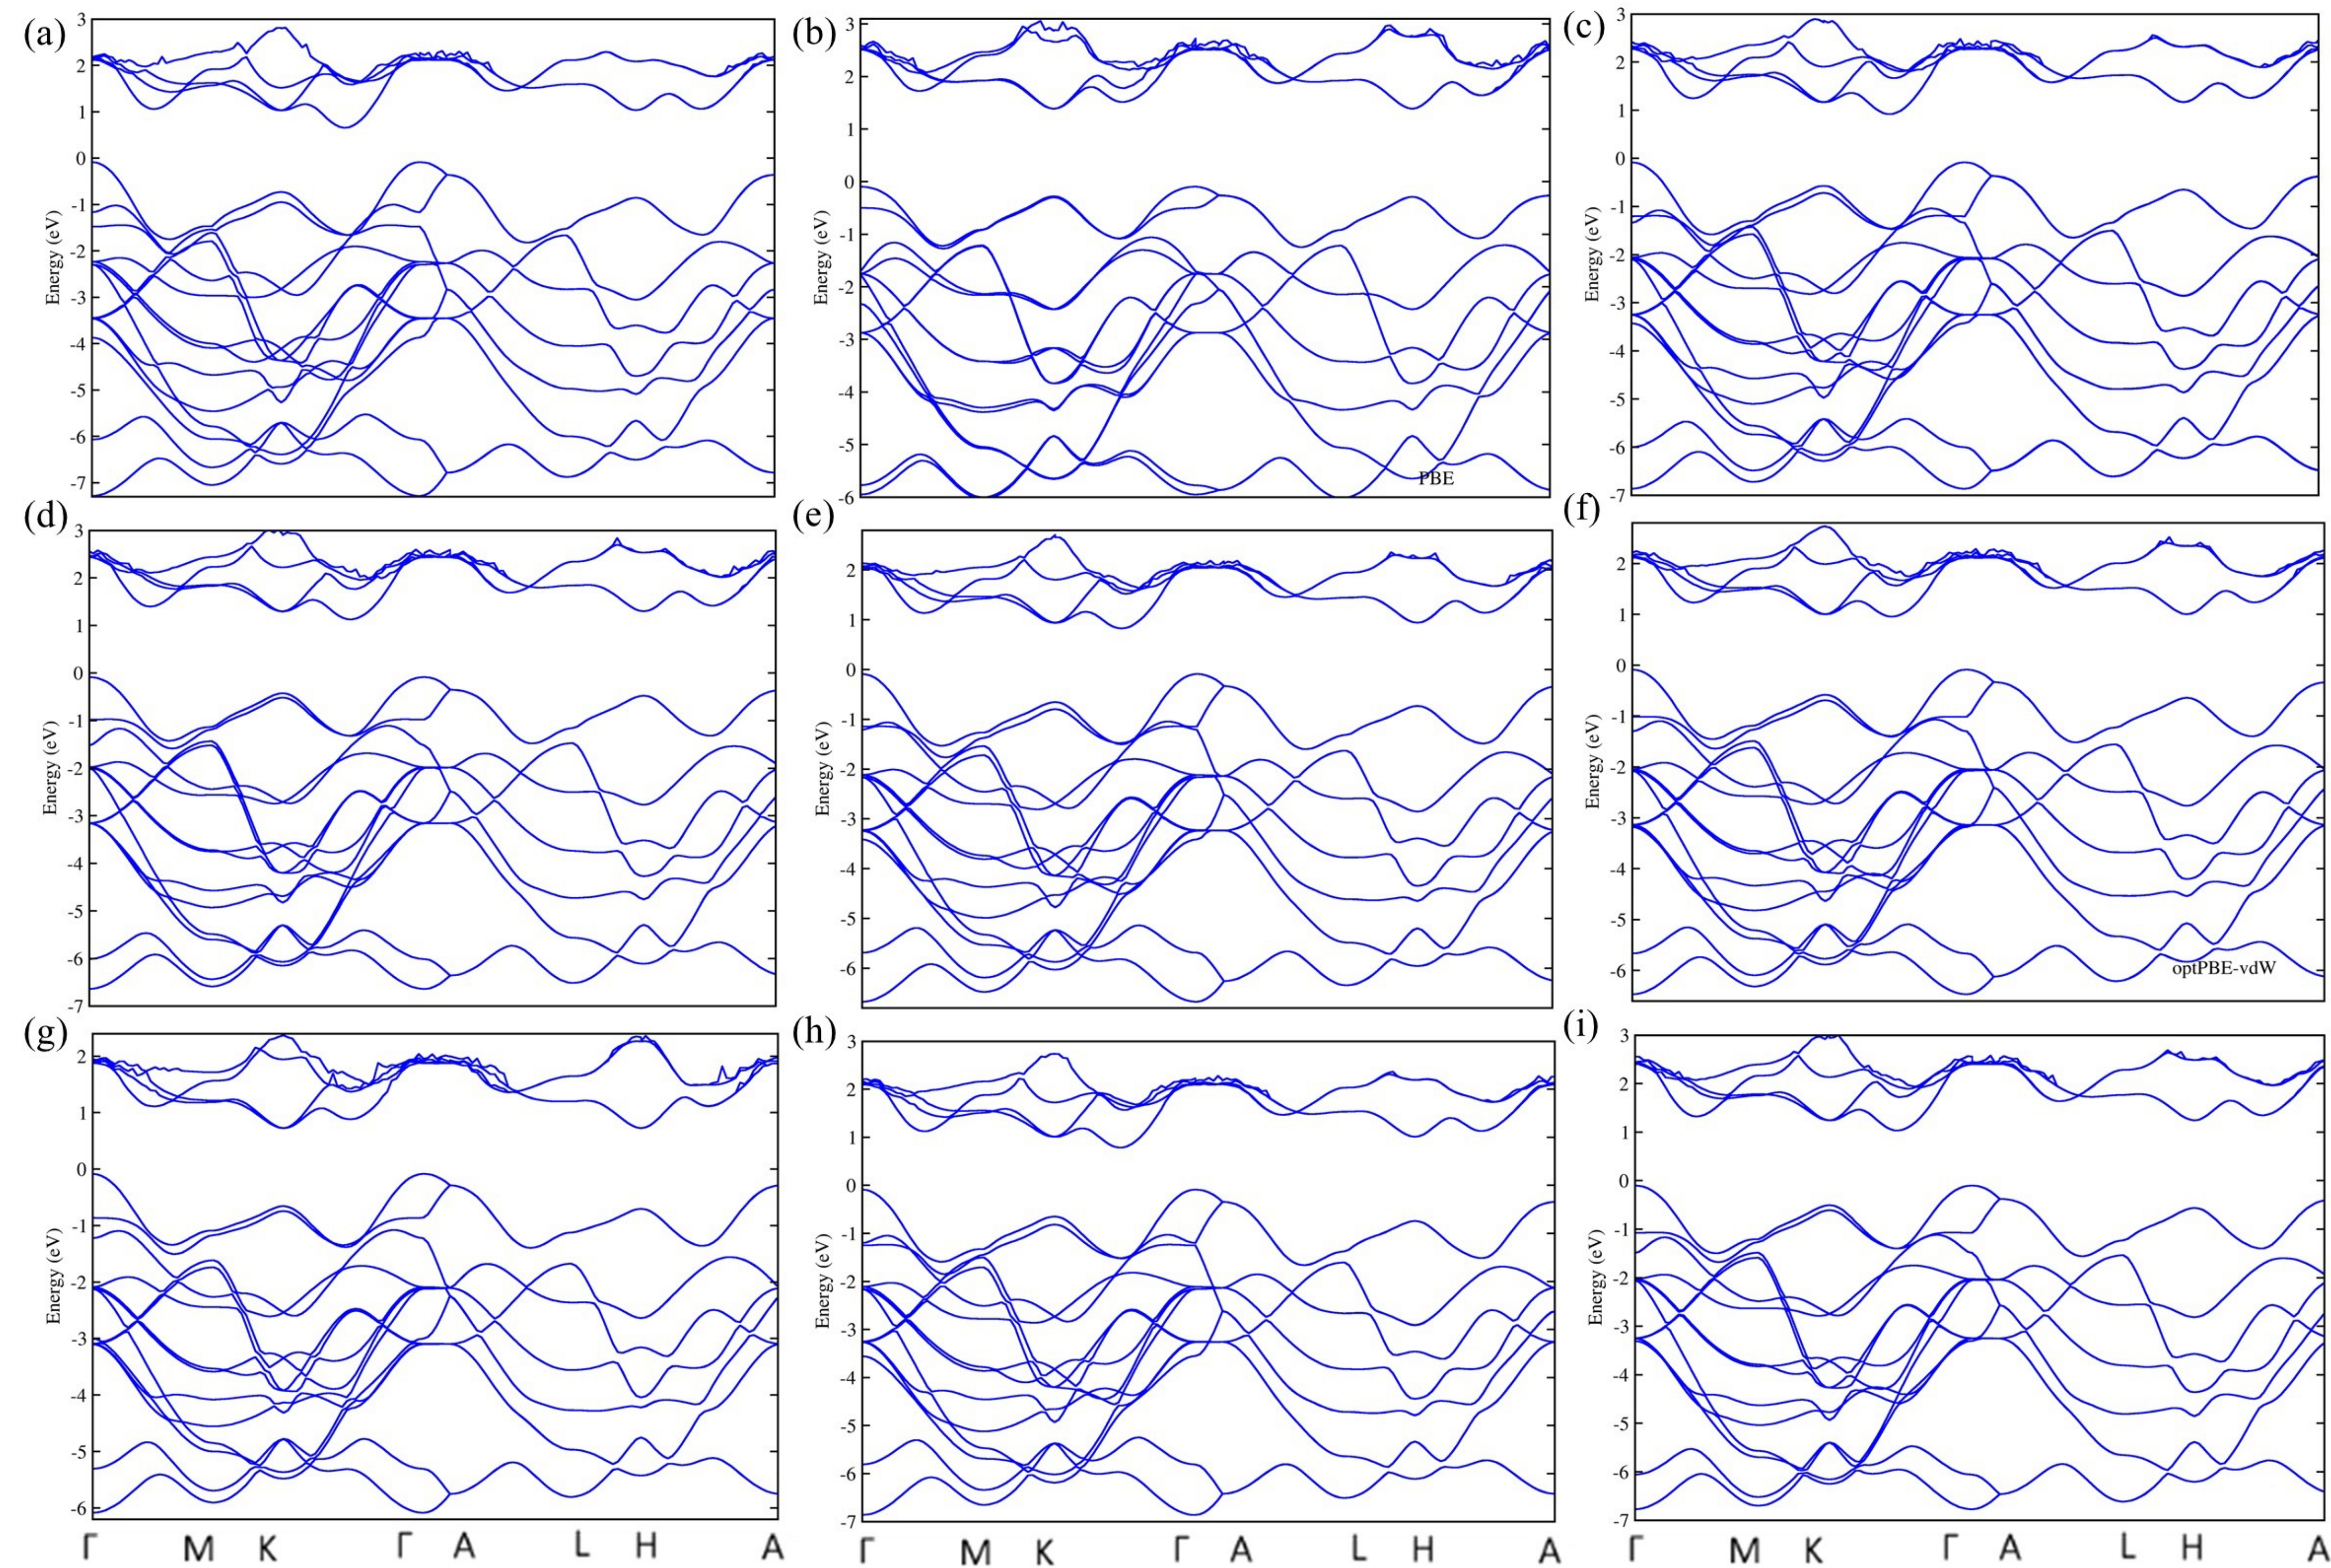

Supplement: d4nj03862b9.pdf [file d4nj03862b9.pdf]
